# Supplementary material for: Mechanistic explorations on the decarboxylative allylation of amino esters via dual photoredox and palladium catalysis
Source: Royal Society of Chemistry journal article supplement (doi:10.1039/d2ob02161g), 2023-01-01
Supplement: d2ob02161g1.pdf [file d2ob02161g1.pdf]

## Supporting Information

### Mechanistic explorations on the decarboxylative allylation of amino esters via dual photoredox and palladium catalysis

Qingqing Chen, Ruizhong Zhang,\* Yanfeng Dang\*

Tianjin Key Laboratory of Molecular Optoelectronic Sciences, Department of Chemistry, School of Science,  
Tianjin University, Tianjin 300072, China; E-mail: zhangrz2019@tju.edu.cn; yanfeng.dang@tju.edu.cn

#### Table contents

|                                                                    |    |
|--------------------------------------------------------------------|----|
| 1. Computational Details                                           | S2 |
| 2. Activation barriers of Single Electron Transfer Steps           | S2 |
| 3. Fig. S1                                                         | S3 |
| 4. Fig. S2                                                         | S3 |
| 5. Fig. S3                                                         | S4 |
| 6. Fig. S4                                                         | S4 |
| 7. REFERENCES                                                      | S5 |
| 8. Energies and Cartesian Coordinates for the Optimized Structures | S6 |

## Computational Details

All of the calculations were performed with Gaussian 09 package. The M06-L functional with a mixed basis set of SDD for Pd and Ir and 6-31G(d) for other atoms was used for geometry optimizations and frequency calculations. Frequency outcomes were scrutinized to confirm stationary points as minima (no imaginary frequencies) or transition states (one imaginary frequency). Single-point energies were then calculated using the def2-TZVP basis set. The solvation effects were taken into consideration using the SMD model with CH<sub>3</sub>CN as the solvent.

It should be emphasized that we have adopted the approximate approach proposed by Goddard III et al.<sup>1</sup> to correct free energies in the relevant figures. According to this approach, a correction of 1.89 kcal/mol applies to per component change for a reaction at 298.15K and 1 mol/L (i.e., a reaction from m- to n-components has an additional correction of (n – m) × 1.89 kcal/mol).

## Activation barriers of Single Electron Transfer Processes

The SET processes can be described on the basis of the Marcus theory,<sup>2,3</sup> where the Gibbs free energy of activation ( $\Delta G^\ddagger$ ), is related to the Gibbs free energy of electron transfer ( $\Delta G$ ) and the reorganization energy ( $\lambda$ ) according to S1.

$$\Delta G^\ddagger = \frac{(\Delta G + \lambda)^2}{4\lambda} \quad (S1)$$

The reorganization energy  $\lambda$  including internal reorganization energy ( $\lambda_{\text{int}}$ ) and external reorganization energy ( $\lambda_{\text{ext}}$ ). Here, we used DFT calculation and continuum solvation models to estimate the reorganization energy of by the Buda method<sup>4</sup> where internal reorganization energy and external reorganization energy are not considered separately but as a parameter. Thus, the reorganization energy  $\lambda$  can be expressed as the sum of donor ( $\lambda_D$ ) and acceptor ( $\lambda_A$ ) reorganization energies, as expressed in S2.

$$\lambda = \lambda_i + \lambda_e = \lambda_D + \lambda_A \quad (S2)$$

$$\lambda_D = E(D^+ / D) - E(D^+ / D^+) \quad (S3)$$

$$\lambda_A = E(A^- / A) - E(A^- / A^-) \quad (S4)$$

Where D and A represent the cationic donor and the anionic acceptor, respectively (S6 and S7).  $E(D^+ / D)$  and  $E(D^+ / D^+)$  separately represent the energies of cationic donor at the optimized neutral and cationic geometries.  $E(A^- / A)$  and  $E(A^- / A^-)$  separately represent the energies of anionic acceptor at the optimized neutral and anionic geometries.

The reorganization energy calculation method discussed above is for self-exchange reaction. For cross reaction, such as  $B + C = B^+ + C^-$ , the reorganization energy  $\lambda$  is:

$$\lambda = \frac{1}{2}(\lambda_B + \lambda_C) \quad (S5)$$

Where  $\lambda_B$  and  $\lambda_C$  correspond to the reorganization energies of the two self-exchange reactions of B and C, respectively.

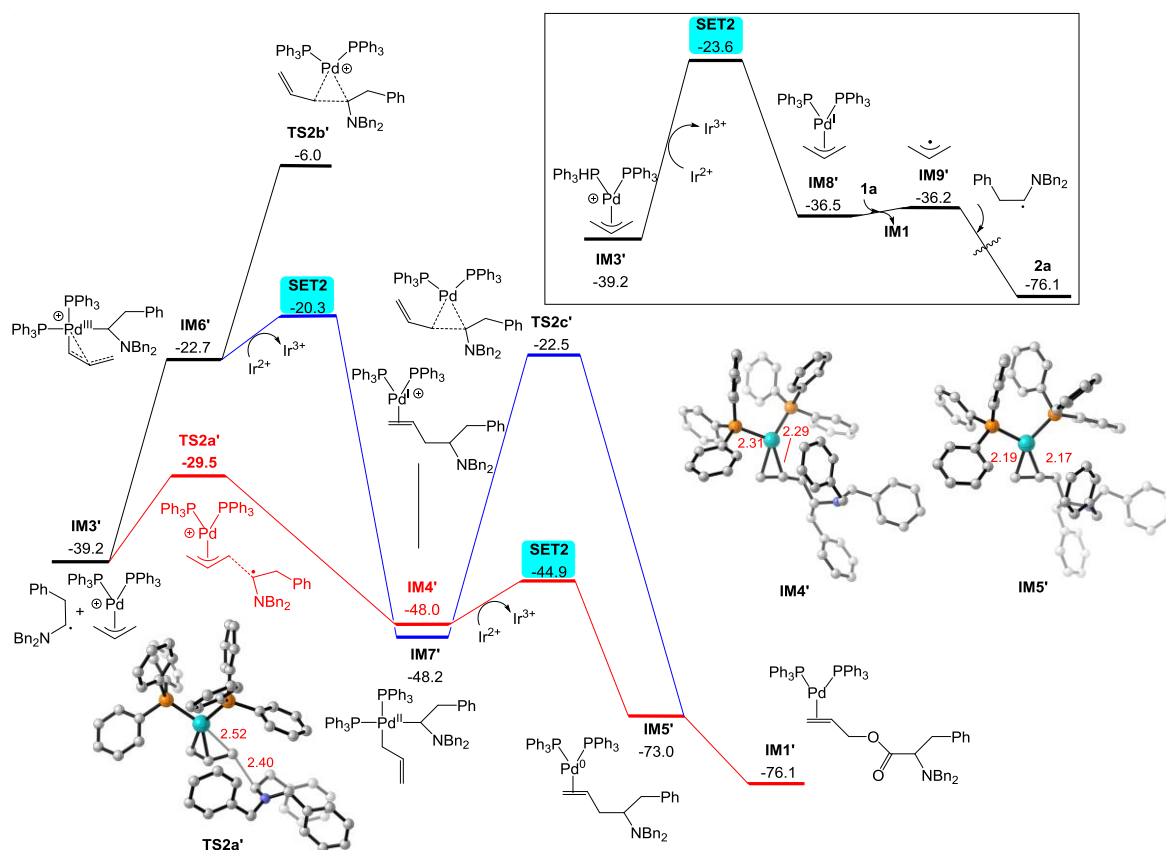

**Fig. S1.** Free energy profiles for the allylation of N,N-dibenzyl phenylalanine via inner-sphere pathway, outer-sphere pathway and radical coupling pathway.

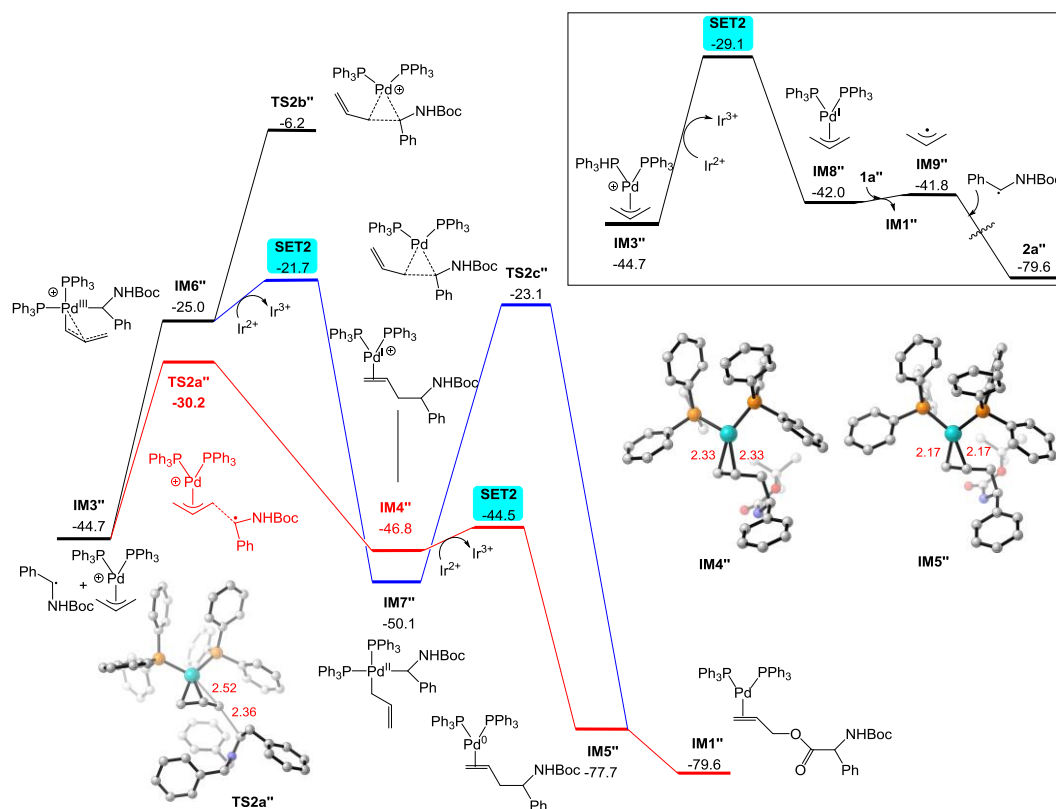

**Fig. S2.** Free energy profiles for the allylation of N-Boc phenylglycine via inner-sphere pathway, outer-sphere pathway, and radical coupling pathway.

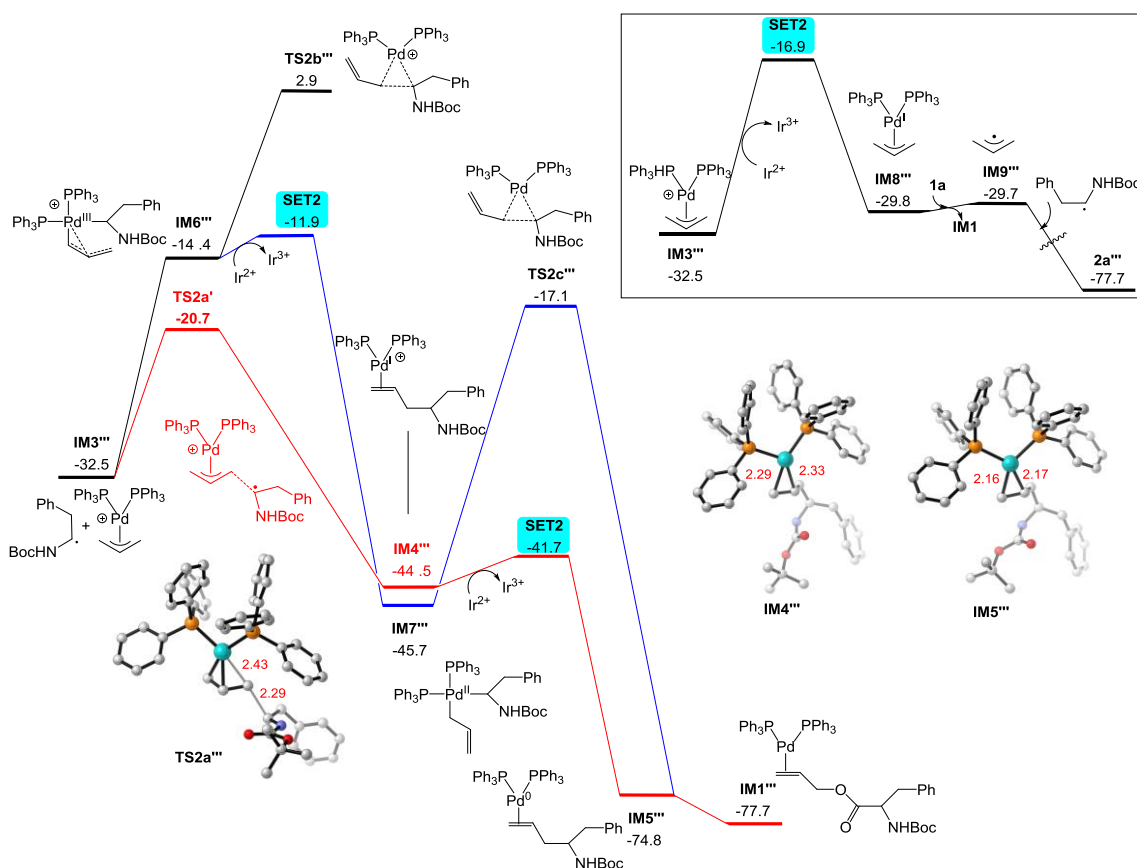

**Fig. S3.** Free energy profiles for the allylation of N-Boc phenylalanine via inner-sphere pathway, outer-sphere pathway and radical coupling pathway.

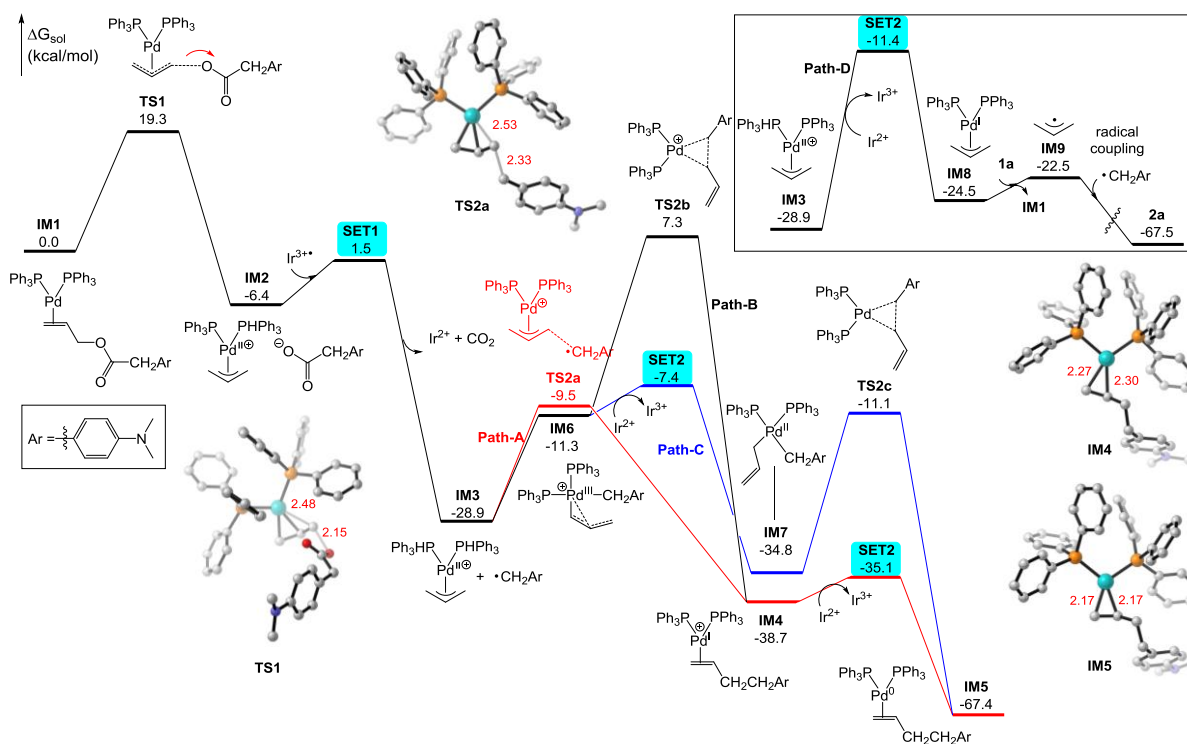

**Fig. S4.** Free energy profiles for the decarboxylative allylation of amino esters with other DFT functional and basis sets. (PBE0-D3(BJ)) functional with a mixed basis set of SDD for Pd and Ir and 6-311++G(d,p) for other atoms)

## REFERENCES

1. V. S. Bryantsev, M. S. Diallo and W. A. Goddard III, *J. Phys. Chem. B*, 2008, **112**, 9709.
2. R. A. Marcus, *Angew. Chem. Int. Ed. Engl.*, 1993, **32**, 1111.
3. L. Closs Gerhard and R. Miller John, *Science*, 1988, **240**, 440.
4. M. Buda, *Electrochimica Acta*, 2013, **113**, 536.

## Energies and Cartesian Coordinates for the Optimized Structures

|                                        |           |           |           |   |          |           |           |
|----------------------------------------|-----------|-----------|-----------|---|----------|-----------|-----------|
| <b>IM1</b>                             |           |           |           | H | 1.392557 | -1.929867 | 3.029353  |
| SCF energy in MeCN: -2912.025618 a.u.  |           |           |           | C | 5.130768 | -1.897966 | 2.014627  |
| Free energy in MeCN: -2911.286045 a.u. |           |           |           | H | 4.437252 | -1.910161 | -0.015927 |
|                                        |           |           |           | C | 4.774945 | -1.912177 | 3.361815  |
| C                                      | -1.957715 | -0.433096 | -1.208768 | H | 3.138472 | -1.931565 | 4.764121  |
| H                                      | -1.976667 | 0.188966  | -0.303842 | H | 6.179790 | -1.887039 | 1.721175  |
| H                                      | -1.909756 | -1.479160 | -0.883642 | H | 5.544061 | -1.911461 | 4.132988  |
| C                                      | -0.849251 | -0.054649 | -2.126578 | P | 2.561614 | 1.772680  | -0.160267 |
| H                                      | -0.681179 | -0.741749 | -2.960423 | C | 2.375104 | 3.575483  | -0.461789 |
| C                                      | -0.428211 | 1.286020  | -2.258888 | C | 2.045933 | 3.980200  | -1.762460 |
| H                                      | -0.926588 | 2.074900  | -1.690100 | C | 2.545272 | 4.552109  | 0.526141  |
| P                                      | 1.538155  | -1.781884 | 0.032175  | C | 1.903329 | 5.327857  | -2.071711 |
| C                                      | 2.157578  | -3.030915 | -1.156867 | H | 1.892737 | 3.221734  | -2.531739 |
| C                                      | 2.064925  | -2.745690 | -2.523875 | C | 2.391422 | 5.901954  | 0.217278  |
| C                                      | 2.724026  | -4.249644 | -0.756396 | H | 2.794281 | 4.255013  | 1.545059  |
| C                                      | 2.518854  | -3.659099 | -3.472814 | C | 2.072782 | 6.292821  | -1.080242 |
| H                                      | 1.635938  | -1.788791 | -2.830803 | H | 1.647405 | 5.626007  | -3.087165 |
| C                                      | 3.174562  | -5.162640 | -1.703987 | H | 2.522673 | 6.651595  | 0.996165  |
| H                                      | 2.815089  | -4.477563 | 0.306184  | H | 1.949964 | 7.348188  | -1.318253 |
| C                                      | 3.071820  | -4.869062 | -3.063407 | C | 2.574371 | 1.689946  | 1.670757  |
| H                                      | 2.443819  | -3.422197 | -4.532789 | C | 3.713099 | 1.524809  | 2.463755  |
| H                                      | 3.609035  | -6.107392 | -1.380932 | C | 1.320323 | 1.764755  | 2.298559  |
| H                                      | 3.429756  | -5.583936 | -3.802519 | C | 3.601442 | 1.454104  | 3.851284  |
| C                                      | 0.041436  | -2.537700 | 0.768387  | H | 4.693880 | 1.427451  | 2.000597  |
| C                                      | -0.744339 | -1.727236 | 1.603713  | C | 1.212071 | 1.702089  | 3.682564  |
| C                                      | -0.421180 | -3.816070 | 0.443350  | H | 0.423307 | 1.874821  | 1.684358  |
| C                                      | -1.955546 | -2.186719 | 2.105682  | C | 2.356439 | 1.549874  | 4.464722  |
| H                                      | -0.412536 | -0.709344 | 1.824963  | H | 4.497795 | 1.311354  | 4.453718  |
| C                                      | -1.642031 | -4.270793 | 0.939339  | H | 0.231593 | 1.769042  | 4.152007  |
| H                                      | 0.162930  | -4.456109 | -0.215988 | H | 2.274185 | 1.492882  | 5.548940  |
| C                                      | -2.410913 | -3.459540 | 1.767632  | C | 4.302206 | 1.497362  | -0.665442 |
| H                                      | -2.568040 | -1.534895 | 2.724891  | C | 5.342265 | 2.372676  | -0.326239 |
| H                                      | -1.996512 | -5.263440 | 0.665064  | C | 4.595083 | 0.368442  | -1.437505 |
| H                                      | -3.374493 | -3.807624 | 2.134707  | C | 6.648630 | 2.102099  | -0.720110 |
| Pd                                     | 0.979954  | 0.272580  | -1.002290 | H | 5.122510 | 3.273845  | 0.248281  |
| O                                      | -3.237852 | -0.248209 | -1.895498 | C | 5.901712 | 0.098192  | -1.836294 |
| C                                      | -4.317764 | -0.480428 | -1.130111 | H | 3.776816 | -0.298852 | -1.721507 |
| O                                      | -4.268217 | -0.789208 | 0.042873  | C | 6.930879 | 0.961348  | -1.471032 |
| C                                      | 2.785359  | -1.914052 | 1.376587  | H | 7.450367 | 2.786008  | -0.445506 |
| C                                      | 2.440472  | -1.921040 | 2.732640  | H | 6.113548 | -0.786484 | -2.435220 |
| C                                      | 4.145615  | -1.901245 | 1.033544  | H | 7.953854 | 0.753169  | -1.780571 |
| C                                      | 3.428431  | -1.924343 | 3.714269  | H | 0.038518 | 1.623003  | -3.185132 |

|                                       |            |           |           |                                       |           |           |           |
|---------------------------------------|------------|-----------|-----------|---------------------------------------|-----------|-----------|-----------|
| C                                     | -5.586583  | -0.351135 | -1.950825 | H                                     | -4.566391 | -2.147174 | -0.776913 |
| H                                     | -5.413567  | 0.369392  | -2.758555 | H                                     | -5.074825 | -1.609760 | 0.839596  |
| H                                     | -5.711741  | -1.324010 | -2.454165 | C                                     | 1.111275  | 0.499192  | 1.032581  |
| C                                     | -6.812440  | 0.002011  | -1.160790 | C                                     | 2.104097  | -0.306615 | 0.225435  |
| C                                     | -7.249929  | -0.784929 | -0.091238 | H                                     | 1.412374  | 1.552975  | 1.004507  |
| C                                     | -7.574573  | 1.125540  | -1.481128 | H                                     | 1.262642  | 0.188389  | 2.079621  |
| C                                     | -8.385601  | -0.458812 | 0.634478  | O                                     | 1.877844  | -1.328471 | -0.382930 |
| H                                     | -6.679800  | -1.668109 | 0.188797  | O                                     | 3.332728  | 0.253566  | 0.311652  |
| C                                     | -8.718511  | 1.465931  | -0.769541 | C                                     | 4.374985  | -0.483003 | -0.362101 |
| H                                     | -7.270140  | 1.755880  | -2.318028 | H                                     | 4.195065  | -0.456696 | -1.444201 |
| C                                     | -9.142447  | 0.688119  | 0.323511  | H                                     | 4.304764  | -1.534528 | -0.050299 |
| H                                     | -8.685035  | -1.106170 | 1.454599  | C                                     | 5.678072  | 0.126306  | 0.004552  |
| H                                     | -9.278777  | 2.348026  | -1.067841 | H                                     | 5.862439  | 0.242871  | 1.074090  |
| N                                     | -10.255242 | 1.043496  | 1.075631  | C                                     | 6.604817  | 0.487998  | -0.879816 |
| C                                     | -10.784819 | 0.092559  | 2.021814  | H                                     | 6.440535  | 0.386648  | -1.952345 |
| H                                     | -11.644083 | 0.536242  | 2.531894  | H                                     | 7.566383  | 0.891052  | -0.571366 |
| H                                     | -11.109720 | -0.853974 | 1.554594  |                                       |           |           |           |
| H                                     | -10.037693 | -0.153271 | 2.787233  | <b>2a</b>                             |           |           |           |
| C                                     | -11.150304 | 2.047990  | 0.556303  | SCF energy in MeCN: -522.35349 a.u.   |           |           |           |
| H                                     | -11.970917 | 2.196069  | 1.263243  | Free energy in MeCN: -522.129713 a.u. |           |           |           |
| H                                     | -10.636354 | 3.011367  | 0.442219  |                                       |           |           |           |
| H                                     | -11.581673 | 1.780628  | -0.424469 | C                                     | -1.099068 | -1.057211 | 0.173688  |
|                                       |            |           |           | C                                     | 0.272270  | -0.825895 | 0.204722  |
|                                       |            |           |           | C                                     | 0.807137  | 0.460859  | 0.136952  |
| <b>1a</b>                             |            |           |           | C                                     | -0.105767 | 1.515467  | 0.028512  |
| SCF energy in MeCN: -710.976398 a.u.  |            |           |           | C                                     | -1.475730 | 1.308850  | -0.003848 |
| Free energy in MeCN: -710.742974 a.u. |            |           |           | C                                     | -2.011875 | 0.007906  | 0.081785  |
|                                       |            |           |           | H                                     | -1.456853 | -2.082396 | 0.217646  |
| C                                     | -3.062221  | 0.063590  | -0.095300 | H                                     | 0.934519  | -1.688184 | 0.273716  |
| C                                     | -2.285458  | -1.053669 | 0.271594  | H                                     | 0.270762  | 2.537563  | -0.040329 |
| C                                     | -0.950190  | -0.914892 | 0.617857  | H                                     | -2.134526 | 2.168177  | -0.098586 |
| C                                     | -0.323086  | 0.334347  | 0.626667  | N                                     | -3.384563 | -0.209491 | 0.083885  |
| C                                     | -1.095262  | 1.441334  | 0.276000  | C                                     | -3.866757 | -1.557167 | -0.096869 |
| C                                     | -2.434790  | 1.323309  | -0.071433 | H                                     | -4.959785 | -1.552813 | -0.078723 |
| H                                     | -2.727848  | -2.046064 | 0.287939  | H                                     | -3.536940 | -2.013393 | -1.047006 |
| H                                     | -0.378075  | -1.802624 | 0.880624  | H                                     | -3.526728 | -2.206386 | 0.720150  |
| H                                     | -0.640345  | 2.433083  | 0.281449  | C                                     | -4.253250 | 0.873917  | -0.307915 |
| H                                     | -2.991170  | 2.220380  | -0.328044 | H                                     | -5.290967 | 0.532148  | -0.273426 |
| N                                     | -4.390094  | -0.074725 | -0.475693 | H                                     | -4.162650 | 1.719133  | 0.386249  |
| C                                     | -5.205918  | 1.110404  | -0.579998 | H                                     | -4.046369 | 1.250893  | -1.325021 |
| H                                     | -6.217027  | 0.824467  | -0.881297 | C                                     | 2.285748  | 0.751035  | 0.165685  |
| H                                     | -5.273228  | 1.676058  | 0.366024  | H                                     | 2.556022  | 1.365330  | -0.707402 |
| H                                     | -4.813192  | 1.790091  | -1.347262 | H                                     | 2.517432  | 1.386921  | 1.036033  |
| C                                     | -5.054684  | -1.331536 | -0.228732 | C                                     | 3.200831  | -0.470605 | 0.199821  |
| H                                     | -6.085842  | -1.267428 | -0.585881 | H                                     | 3.008147  | -1.109841 | -0.674107 |

|   |          |           |           |
|---|----------|-----------|-----------|
| H | 2.951047 | -1.076310 | 1.086285  |
| C | 4.644720 | -0.094593 | 0.243843  |
| H | 4.948606 | 0.523305  | 1.094414  |
| C | 5.556483 | -0.433190 | -0.666142 |
| H | 5.296063 | -1.042170 | -1.531960 |
| H | 6.595707 | -0.121776 | -0.586535 |

**Benzyl radical**

SCF energy in MeCN: -404.978152 a.u.

Free energy in MeCN: -404.825194 a.u.

|   |           |           |           |
|---|-----------|-----------|-----------|
| C | 0.599132  | -0.000014 | -0.063029 |
| C | -0.135998 | 1.208387  | -0.035180 |
| C | -1.513332 | 1.205100  | -0.003704 |
| C | -2.270907 | -0.000013 | 0.010195  |
| C | -1.513331 | -1.205118 | -0.003483 |
| C | -0.135991 | -1.208414 | -0.034952 |
| H | 0.386496  | 2.161686  | -0.035239 |
| H | -2.046273 | 2.155906  | 0.017520  |
| H | -2.046258 | -2.155925 | 0.017998  |
| H | 0.386510  | -2.161706 | -0.034767 |
| N | 1.981698  | 0.000018  | -0.127483 |
| C | 2.696184  | -1.239298 | 0.060264  |
| H | 3.768485  | -1.054201 | -0.040482 |
| H | 2.515273  | -1.694548 | 1.048868  |
| H | 2.414132  | -1.975015 | -0.703763 |
| C | 2.696092  | 1.239336  | 0.060706  |
| H | 3.768451  | 1.054214  | -0.039353 |
| H | 2.414526  | 1.975104  | -0.703458 |
| H | 2.514564  | 1.694525  | 1.049216  |
| C | -3.668766 | 0.000001  | 0.043209  |
| H | -4.233123 | 0.929500  | 0.055685  |
| H | -4.233158 | -0.929465 | 0.055997  |

**Allyl radical**

SCF energy in MeCN: -117.283633 a.u.

Free energy in MeCN: -117.242817 a.u.

|   |           |           |           |
|---|-----------|-----------|-----------|
| C | 1.226662  | 0.195377  | -0.000006 |
| H | 1.293646  | 1.282485  | -0.000003 |
| H | 2.161278  | -0.359098 | 0.000166  |
| C | -0.000001 | -0.442670 | -0.000045 |
| H | -0.000030 | -1.535291 | -0.000019 |
| C | -1.226653 | 0.195382  | 0.000011  |

|   |           |           |           |
|---|-----------|-----------|-----------|
| H | -1.293686 | 1.282489  | -0.000036 |
| H | -2.161253 | -0.359119 | 0.000128  |

**CO<sub>2</sub>**

SCF energy in MeCN: -188.653132 a.u.

Free energy in MeCN: -188.661954

|   |          |          |           |
|---|----------|----------|-----------|
| C | 0.000000 | 0.000000 | 0.000000  |
| O | 0.000000 | 0.000000 | 1.168679  |
| O | 0.000000 | 0.000000 | -1.168679 |

**TS1**

SCF energy in MeCN: -2912.00249 a.u.

Free energy in MeCN: -2911.263517 a.u.

|   |           |           |           |
|---|-----------|-----------|-----------|
| C | -0.311124 | -1.863225 | -2.314904 |
| H | -0.818353 | -1.561582 | -1.405972 |
| H | 0.037811  | -2.890832 | -2.371915 |
| C | 0.126344  | -0.904852 | -3.244788 |
| H | 0.728573  | -1.218897 | -4.098180 |
| C | -0.147426 | 0.468754  | -3.034251 |
| H | -1.061757 | 0.747105  | -2.503219 |
| P | 2.261535  | -1.495293 | 0.152022  |
| C | 3.943314  | -1.999522 | -0.355211 |
| C | 4.341440  | -1.731779 | -1.670234 |
| C | 4.843722  | -2.634325 | 0.511936  |
| C | 5.610273  | -2.095708 | -2.114503 |
| H | 3.640110  | -1.227847 | -2.340478 |
| C | 6.110657  | -2.996874 | 0.067658  |
| H | 4.548496  | -2.837066 | 1.541756  |
| C | 6.495047  | -2.728118 | -1.245882 |
| H | 5.908131  | -1.880867 | -3.139190 |
| H | 6.802550  | -3.489599 | 0.748669  |
| H | 7.488519  | -3.010987 | -1.590031 |
| C | 1.325830  | -3.049482 | 0.394002  |
| C | -0.053795 | -2.938658 | 0.622874  |
| C | 1.889911  | -4.322552 | 0.261626  |
| C | -0.850584 | -4.072859 | 0.720756  |
| H | -0.529464 | -1.957890 | 0.676134  |
| C | 1.087978  | -5.457860 | 0.360497  |
| H | 2.955439  | -4.433286 | 0.065038  |
| C | -0.280127 | -5.337079 | 0.589723  |
| H | -1.922943 | -3.952964 | 0.866776  |
| H | 1.537754  | -6.442957 | 0.247235  |



|    |           |           |           |                                        |           |           |           |
|----|-----------|-----------|-----------|----------------------------------------|-----------|-----------|-----------|
| H  | -0.903674 | -6.227394 | 0.647918  | C                                      | 5.107496  | 2.714991  | 0.181794  |
| Pd | 1.175127  | -0.078227 | -1.432130 | H                                      | 3.853120  | 1.162896  | -0.653732 |
| O  | -2.352296 | -2.459483 | -2.658908 | C                                      | 5.135271  | 3.953134  | 0.816709  |
| C  | -3.024921 | -2.099545 | -1.637528 | H                                      | 3.963731  | 5.595669  | 1.579183  |
| O  | -2.621668 | -1.471731 | -0.632350 | H                                      | 6.036126  | 2.197789  | -0.055332 |
| C  | 2.514848  | -0.876264 | 1.862942  | H                                      | 6.087856  | 4.409105  | 1.081760  |
| C  | 1.549317  | -1.067331 | 2.858289  | H                                      | 0.202964  | 1.210229  | -3.752584 |
| C  | 3.644290  | -0.104252 | 2.166759  | C                                      | -4.494869 | -2.575710 | -1.661706 |
| C  | 1.714735  | -0.507172 | 4.121097  | H                                      | -4.811562 | -2.681048 | -2.705763 |
| H  | 0.660580  | -1.660338 | 2.651652  | H                                      | -4.473525 | -3.597854 | -1.250318 |
| C  | 3.799525  | 0.469730  | 3.424559  | C                                      | -5.446772 | -1.718958 | -0.888442 |
| H  | 4.419685  | 0.038742  | 1.416513  | C                                      | -5.378265 | -1.619684 | 0.504874  |
| C  | 2.834471  | 0.268320  | 4.408096  | C                                      | -6.432621 | -0.965065 | -1.525130 |
| H  | 0.952155  | -0.670317 | 4.881018  | C                                      | -6.239245 | -0.805923 | 1.226752  |
| H  | 4.683421  | 1.071090  | 3.633945  | H                                      | -4.621538 | -2.194502 | 1.037782  |
| H  | 2.955561  | 0.713057  | 5.394526  | C                                      | -7.306222 | -0.142653 | -0.821997 |
| P  | 1.120586  | 1.974609  | -0.339416 | H                                      | -6.526418 | -1.023926 | -2.610536 |
| C  | 0.229384  | 3.327507  | -1.193055 | C                                      | -7.218220 | -0.029330 | 0.576556  |
| C  | 0.924495  | 4.137972  | -2.102108 | H                                      | -6.147712 | -0.776842 | 2.309732  |
| C  | -1.155551 | 3.486161  | -1.067799 | H                                      | -8.062302 | 0.411205  | -1.372353 |
| C  | 0.250158  | 5.090501  | -2.857467 | N                                      | -8.056113 | 0.827160  | 1.291907  |
| H  | 2.002927  | 4.023108  | -2.215867 | C                                      | -8.136360 | 0.664506  | 2.722684  |
| C  | -1.827371 | 4.439078  | -1.828992 | H                                      | -8.836092 | 1.400686  | 3.128428  |
| H  | -1.715928 | 2.863539  | -0.371165 | H                                      | -8.473203 | -0.341592 | 3.032306  |
| C  | -1.128792 | 5.243387  | -2.724390 | H                                      | -7.160650 | 0.846357  | 3.190881  |
| H  | 0.805129  | 5.716425  | -3.554586 | C                                      | -9.221323 | 1.352953  | 0.624398  |
| H  | -2.904360 | 4.550519  | -1.717799 | H                                      | -9.772125 | 1.995930  | 1.316860  |
| H  | -1.656215 | 5.987789  | -3.318203 | H                                      | -8.931818 | 1.968937  | -0.236371 |
| C  | 0.135670  | 1.684527  | 1.174130  | H                                      | -9.908316 | 0.568613  | 0.257786  |
| C  | 0.385841  | 2.275128  | 2.415530  |                                        |           |           |           |
| C  | -0.944063 | 0.794423  | 1.046030  | <b>IM2</b>                             |           |           |           |
| C  | -0.439827 | 1.993808  | 3.501910  | SCF energy in MeCN: -2911.286045 a.u.  |           |           |           |
| H  | 1.241274  | 2.936949  | 2.544766  | Free energy in MeCN: -2911.296328 a.u. |           |           |           |
| C  | -1.769916 | 0.520708  | 2.131703  |                                        |           |           |           |
| H  | -1.155482 | 0.298765  | 0.094557  | C                                      | 2.036967  | -1.502320 | -3.057732 |
| C  | -1.518035 | 1.122973  | 3.362937  | H                                      | 1.161087  | -1.414034 | -3.702005 |
| H  | -0.227701 | 2.450670  | 4.467987  | H                                      | 2.404519  | -2.504226 | -2.834215 |
| H  | -2.603702 | -0.166394 | 1.994600  | C                                      | 2.894159  | -0.385240 | -2.953405 |
| H  | -2.156920 | 0.907629  | 4.218274  | H                                      | 3.916339  | -0.482345 | -2.581399 |
| C  | 2.683642  | 2.782364  | 0.143072  | C                                      | 2.286423  | 0.881816  | -3.071117 |
| C  | 2.724390  | 4.043166  | 0.755319  | H                                      | 1.385985  | 0.983124  | -3.680331 |
| C  | 3.886727  | 2.135264  | -0.154741 | P                                      | 0.645966  | -1.924156 | 0.031250  |
| C  | 3.942649  | 4.619171  | 1.098223  | C                                      | 1.925535  | -3.183667 | 0.418131  |
| H  | 1.794691  | 4.577964  | 0.951262  | C                                      | 3.219580  | -3.032141 | -0.090917 |

|    |           |           |           |   |           |           |           |
|----|-----------|-----------|-----------|---|-----------|-----------|-----------|
| C  | 1.641628  | -4.298864 | 1.217565  | H | 4.501804  | 5.019360  | -1.902946 |
| C  | 4.210711  | -3.969612 | 0.191980  | H | 0.304503  | 5.521993  | -2.687032 |
| H  | 3.441681  | -2.160209 | -0.709873 | H | 2.656956  | 6.262571  | -3.015404 |
| C  | 2.628572  | -5.236898 | 1.497587  | C | 0.045544  | 2.103160  | 1.183283  |
| H  | 0.640228  | -4.430070 | 1.627269  | C | 0.163055  | 2.445066  | 2.535830  |
| C  | 3.914999  | -5.074481 | 0.984527  | C | -1.221692 | 2.143016  | 0.578137  |
| H  | 5.212777  | -3.837558 | -0.212564 | C | -0.950702 | 2.867989  | 3.256022  |
| H  | 2.393238  | -6.099667 | 2.118331  | H | 1.122553  | 2.369328  | 3.043041  |
| H  | 4.685482  | -5.811886 | 1.203216  | C | -2.325375 | 2.587409  | 1.301217  |
| C  | -0.752270 | -2.898675 | -0.640577 | H | -1.351943 | 1.770450  | -0.441388 |
| C  | -0.974226 | -2.897996 | -2.020809 | C | -2.193758 | 2.958502  | 2.636628  |
| C  | -1.612605 | -3.635054 | 0.186353  | H | -0.840845 | 3.122853  | 4.309737  |
| C  | -2.022881 | -3.632733 | -2.568511 | H | -3.298820 | 2.613653  | 0.814124  |
| H  | -0.366314 | -2.270791 | -2.667386 | H | -3.065383 | 3.291546  | 3.199913  |
| C  | -2.659881 | -4.367688 | -0.363179 | C | 2.877900  | 1.494358  | 1.329192  |
| H  | -1.482591 | -3.610837 | 1.268328  | C | 3.365726  | 2.590676  | 2.056716  |
| C  | -2.864807 | -4.371442 | -1.742159 | C | 3.470630  | 0.244396  | 1.526362  |
| H  | -2.191348 | -3.597404 | -3.643623 | C | 4.409171  | 2.429808  | 2.962158  |
| H  | -3.324473 | -4.931215 | 0.289945  | H | 2.925964  | 3.576611  | 1.905170  |
| H  | -3.692761 | -4.936021 | -2.167860 | C | 4.511082  | 0.079106  | 2.437014  |
| Pd | 1.387558  | -0.202508 | -1.401232 | H | 3.110409  | -0.605284 | 0.945625  |
| O  | -0.738567 | -0.329771 | -4.043729 | C | 4.981587  | 1.172777  | 3.157196  |
| C  | -1.393215 | 0.095859  | -3.070938 | H | 4.778234  | 3.289678  | 3.518788  |
| O  | -0.950654 | 0.365529  | -1.907390 | H | 4.953566  | -0.906973 | 2.575238  |
| C  | 0.031345  | -1.435500 | 1.677491  | H | 5.797416  | 1.050545  | 3.867825  |
| C  | -1.251642 | -0.876211 | 1.760922  | H | 2.854749  | 1.788653  | -2.869766 |
| C  | 0.821049  | -1.506613 | 2.830559  | C | -2.909304 | 0.324189  | -3.286910 |
| C  | -1.746085 | -0.431797 | 2.980429  | H | -3.021903 | 1.224466  | -3.908283 |
| H  | -1.859315 | -0.777650 | 0.860340  | H | -3.266557 | -0.504524 | -3.915264 |
| C  | 0.326621  | -1.046076 | 4.048896  | C | -3.725793 | 0.448752  | -2.037099 |
| H  | 1.822465  | -1.934276 | 2.780769  | C | -3.744110 | -0.584589 | -1.093210 |
| C  | -0.958140 | -0.516052 | 4.127323  | C | -4.493939 | 1.574293  | -1.743770 |
| H  | -2.741315 | 0.009903  | 3.024558  | C | -4.460651 | -0.493652 | 0.090036  |
| H  | 0.950069  | -1.106482 | 4.939549  | H | -3.164064 | -1.487286 | -1.285493 |
| H  | -1.342282 | -0.154810 | 5.080270  | C | -5.226158 | 1.687130  | -0.562691 |
| P  | 1.487615  | 1.636301  | 0.146592  | H | -4.529160 | 2.396534  | -2.460672 |
| C  | 1.862847  | 3.193031  | -0.752199 | C | -5.196950 | 0.665549  | 0.402274  |
| C  | 3.185942  | 3.607549  | -0.956444 | H | -4.428975 | -1.330719 | 0.785364  |
| C  | 0.832768  | 3.892352  | -1.392596 | H | -5.812051 | 2.587313  | -0.393156 |
| C  | 3.467795  | 4.708461  | -1.760968 | N | -5.828476 | 0.805753  | 1.640473  |
| H  | 4.004951  | 3.062777  | -0.487971 | C | -6.123752 | -0.392019 | 2.392301  |
| C  | 1.118743  | 4.990015  | -2.198316 | H | -6.661042 | -0.117864 | 3.304670  |
| H  | -0.200800 | 3.572831  | -1.267435 | H | -6.739712 | -1.117064 | 1.831764  |
| C  | 2.435426  | 5.404113  | -2.383980 | H | -5.202488 | -0.904736 | 2.697473  |

|   |           |          |          |   |           |           |           |
|---|-----------|----------|----------|---|-----------|-----------|-----------|
| C | -6.711823 | 1.929506 | 1.827913 | C | 1.328601  | 0.184072  | -3.391015 |
| H | -7.093523 | 1.919093 | 2.852973 | H | 1.502098  | 1.261964  | -3.414522 |
| H | -6.167112 | 2.872743 | 1.688369 | P | -1.788444 | 0.006602  | -0.122304 |
| H | -7.574782 | 1.937384 | 1.137022 | C | -3.151372 | -0.918282 | -0.909700 |

**carboxylate anion**

SCF energy in MeCN: -593.635425 a.u.

Free energy in MeCN: -593.47927 a.u.

|   |           |           |           |    |           |           |           |
|---|-----------|-----------|-----------|----|-----------|-----------|-----------|
| O | -4.469788 | 0.460955  | -0.678452 | H  | -4.756481 | 0.239033  | -0.040563 |
| C | -3.516042 | -0.215891 | -0.245123 | C  | -5.177772 | -2.478908 | -2.039700 |
| O | -3.223916 | -1.423933 | -0.408327 | H  | -3.585314 | -3.646218 | -2.908503 |
| C | -2.538008 | 0.572741  | 0.734382  | H  | -6.543118 | -1.135958 | -1.052723 |
| H | -2.795672 | 1.640469  | 0.730446  | H  | -5.967675 | -3.082760 | -2.481224 |
| H | -2.779970 | 0.187817  | 1.738271  | C  | -2.447055 | 1.668609  | 0.224819  |
| C | -1.084163 | 0.389730  | 0.470134  | C  | -2.205668 | 2.695502  | -0.696790 |
| C | -0.490451 | -0.883128 | 0.464836  | C  | -3.219791 | 1.941887  | 1.361211  |
| C | -0.239237 | 1.467951  | 0.191316  | C  | -2.728191 | 3.968096  | -0.494018 |
| C | 0.861558  | -1.059132 | 0.202846  | H  | -1.593451 | 2.491576  | -1.576770 |
| H | -1.140118 | -1.739397 | 0.631128  | C  | -3.738565 | 3.217566  | 1.564417  |
| C | 1.119025  | 1.308446  | -0.074414 | H  | -3.410469 | 1.155548  | 2.090847  |
| H | -0.658907 | 2.476349  | 0.187586  | C  | -3.494959 | 4.230461  | 0.639234  |
| C | 1.701556  | 0.032054  | -0.083715 | H  | -2.535445 | 4.755912  | -1.219371 |
| H | 1.265865  | -2.069728 | 0.218469  | H  | -4.337458 | 3.420354  | 2.449784  |
| H | 1.720401  | 2.192816  | -0.275955 | H  | -3.903452 | 5.225632  | 0.801710  |
| N | 3.070802  | -0.155322 | -0.390653 | Pd | 0.078397  | 0.046128  | -1.600603 |
| C | 3.670069  | -1.390794 | 0.049115  | C  | -1.632961 | -0.792258 | 1.512223  |
| H | 4.733340  | -1.387695 | -0.216113 | C  | -0.998266 | -0.117532 | 2.565006  |
| H | 3.583126  | -1.565734 | 1.139807  | C  | -2.070549 | -2.107781 | 1.712739  |
| H | 3.209071  | -2.247244 | -0.457101 | C  | -0.794838 | -0.753832 | 3.785324  |
| C | 3.921168  | 1.002299  | -0.285110 | H  | -0.686056 | 0.918675  | 2.440748  |
| H | 4.950719  | 0.715285  | -0.527141 | C  | -1.870708 | -2.735819 | 2.938493  |
| H | 3.616137  | 1.771224  | -1.005544 | H  | -2.577276 | -2.644850 | 0.912242  |
| H | 3.917180  | 1.471267  | 0.719357  | C  | -1.225687 | -2.064661 | 3.973946  |

**$\Pi$ -allylpalladium cation**

SCF energy in MeCN: -2318.239469 a.u.

Free energy in MeCN: -2317.687917 a.u.

|   |           |           |           |   |           |           |           |
|---|-----------|-----------|-----------|---|-----------|-----------|-----------|
| C | -1.094812 | 0.380844  | -3.451671 | H | -2.225934 | -3.754233 | 3.084300  |
| H | -1.074205 | 1.471393  | -3.489250 | H | -1.069235 | -2.558205 | 4.930927  |
| H | -2.074600 | -0.075146 | -3.575499 | P | 1.877801  | -0.007993 | -0.078783 |
| C | 0.072289  | -0.342004 | -3.751955 | C | 3.508609  | 0.374145  | -0.802800 |
| H | -0.007578 | -1.403281 | -3.995510 | C | 4.223244  | -0.639250 | -1.457173 |
|   |           |           |           | C | 4.020486  | 1.676029  | -0.791472 |
|   |           |           |           | C | 5.433792  | -0.353968 | -2.078449 |
|   |           |           |           | H | 3.836185  | -1.658972 | -1.467542 |
|   |           |           |           | C | 5.232481  | 1.956381  | -1.418013 |



|   |           |           |           |    |           |           |           |
|---|-----------|-----------|-----------|----|-----------|-----------|-----------|
| H | -0.835016 | -2.871049 | -4.673638 |    |           |           |           |
| H | -2.285525 | -5.829955 | -1.909343 |    |           |           |           |
| H | -1.899090 | -5.075255 | -4.243210 |    |           |           |           |
| C | 1.437931  | -2.098610 | 0.325460  |    |           |           |           |
| C | 2.043962  | -3.214880 | -0.261955 |    |           |           |           |
| C | 2.229790  | -1.192513 | 1.051799  | Pd | 0.331379  | -0.800175 | -0.360185 |
| C | 3.414254  | -3.420797 | -0.119980 | P  | 2.622453  | -1.124300 | 0.038460  |
| H | 1.446838  | -3.921483 | -0.836215 | P  | -0.167224 | 1.467639  | -0.024474 |
| C | 3.595878  | -1.403590 | 1.193913  | C  | 3.715384  | 0.277789  | -0.422388 |
| H | 1.765185  | -0.305498 | 1.490894  | C  | 4.766488  | 0.732250  | 0.381044  |
| C | 4.189327  | -2.518194 | 0.602404  | C  | 3.427892  | 0.964651  | -1.610007 |
| H | 3.876730  | -4.291984 | -0.579917 | C  | 5.500903  | 1.857399  | 0.012646  |
| H | 4.203182  | -0.689778 | 1.748083  | H  | 5.001951  | 0.214064  | 1.310423  |
| H | 5.262087  | -2.675113 | 0.698324  | C  | 4.163098  | 2.086262  | -1.980183 |
| C | 6.805728  | 0.964361  | 0.308699  | H  | 2.599310  | 0.624598  | -2.233758 |
| C | 6.582521  | -0.012837 | -0.685332 | C  | 5.197698  | 2.540423  | -1.162773 |
| C | 5.573514  | 0.148024  | -1.621494 | H  | 6.310969  | 2.205883  | 0.652391  |
| C | 4.749518  | 1.279317  | -1.637870 | H  | 3.914179  | 2.616209  | -2.898765 |
| C | 4.979060  | 2.249457  | -0.654907 | H  | 5.765540  | 3.426472  | -1.442018 |
| C | 5.973645  | 2.106223  | 0.299632  | C  | 3.049603  | -1.377714 | 1.805476  |
| H | 7.210601  | -0.898427 | -0.734407 | C  | 4.067625  | -2.235558 | 2.239481  |
| H | 5.427872  | -0.628227 | -2.374556 | C  | 2.341126  | -0.633399 | 2.758521  |
| H | 4.371046  | 3.155631  | -0.646937 | C  | 4.370916  | -2.341201 | 3.594630  |
| H | 6.119959  | 2.895504  | 1.031802  | H  | 4.630408  | -2.820718 | 1.512318  |
| N | 7.793945  | 0.810602  | 1.254611  | C  | 2.654961  | -0.729862 | 4.110129  |
| C | 8.084611  | 1.888288  | 2.171849  | H  | 1.539727  | 0.030505  | 2.431384  |
| H | 8.902225  | 1.589709  | 2.830495  | C  | 3.669271  | -1.586668 | 4.531885  |
| H | 7.215953  | 2.124648  | 2.801620  | H  | 5.164274  | -3.013390 | 3.918706  |
| H | 8.383799  | 2.809449  | 1.648997  | H  | 2.098000  | -0.136020 | 4.833593  |
| C | 8.691271  | -0.317807 | 1.176473  | H  | 3.911470  | -1.668788 | 5.590415  |
| H | 9.397069  | -0.275953 | 2.008078  | C  | 3.449939  | -2.550747 | -0.767199 |
| H | 9.266346  | -0.330692 | 0.237787  | C  | 4.627748  | -2.450450 | -1.515269 |
| H | 8.144254  | -1.268618 | 1.249058  | C  | 2.848206  | -3.809526 | -0.623642 |
| C | 3.653031  | 1.421813  | -2.644543 | C  | 5.187997  | -3.581877 | -2.106066 |
| C | 2.285608  | 0.851560  | -2.169636 | H  | 5.114185  | -1.483103 | -1.636274 |
| H | 2.450371  | -0.189658 | -1.848529 | C  | 3.417865  | -4.939426 | -1.197539 |
| C | 1.699773  | 1.664182  | -1.060766 | H  | 1.921876  | -3.892332 | -0.053625 |
| H | 2.276986  | 1.689175  | -0.131424 | C  | 4.588990  | -4.827611 | -1.946083 |
| C | 0.643948  | 2.540267  | -1.195947 | H  | 6.102918  | -3.487367 | -2.689291 |
| H | 0.164555  | 2.703643  | -2.163594 | H  | 2.941816  | -5.910259 | -1.069221 |
| H | 0.436516  | 3.288389  | -0.432543 | H  | 5.030613  | -5.710318 | -2.405826 |
| H | 1.593219  | 0.831433  | -3.023473 | C  | 0.607241  | 2.328837  | 1.397932  |
| H | 3.506749  | 2.476046  | -2.916606 | C  | -0.049810 | 2.456699  | 2.627929  |
| H | 3.920209  | 0.889866  | -3.566994 | C  | 1.959306  | 2.699445  | 1.318770  |

**IM5**

SCF energy in MeCN: -2723.402061 a.u.

Free energy in MeCN: -2722.671256 a.u.



|   |           |           |           |                                        |           |           |           |
|---|-----------|-----------|-----------|----------------------------------------|-----------|-----------|-----------|
| H | -6.866192 | 0.071887  | 0.012811  | H                                      | 0.222416  | -6.669207 | -3.163604 |
| C | -1.398696 | 3.299232  | -0.527828 | C                                      | 4.663042  | 1.397185  | -0.332561 |
| C | -0.772474 | 4.328249  | 0.182784  | C                                      | 3.608381  | 2.202693  | 0.170177  |
| C | -2.026883 | 3.596136  | -1.746974 | C                                      | 2.419280  | 2.310279  | -0.513380 |
| C | -0.779947 | 5.630958  | -0.314193 | C                                      | 2.176116  | 1.613572  | -1.724558 |
| H | -0.287488 | 4.116562  | 1.136030  | C                                      | 3.240105  | 0.812321  | -2.214813 |
| C | -2.036372 | 4.896310  | -2.236045 | C                                      | 4.442394  | 0.708443  | -1.554118 |
| H | -2.514265 | 2.799297  | -2.312109 | H                                      | 3.739120  | 2.762341  | 1.092674  |
| C | -1.409337 | 5.916949  | -1.521312 | H                                      | 1.633823  | 2.959551  | -0.121839 |
| H | -0.295073 | 6.424940  | 0.250184  | H                                      | 3.107182  | 0.276341  | -3.153724 |
| H | -2.533861 | 5.115220  | -3.178892 | H                                      | 5.227343  | 0.090758  | -1.981089 |
| H | -1.415004 | 6.934520  | -1.906263 | N                                      | 5.846430  | 1.281221  | 0.340263  |
| C | -1.551910 | -2.282015 | 1.288066  | C                                      | 6.926880  | 0.490312  | -0.213768 |
| C | -2.564371 | -3.227862 | 1.085717  | H                                      | 7.794504  | 0.555775  | 0.444020  |
| C | -1.610686 | -1.475344 | 2.434365  | H                                      | 6.647776  | -0.568929 | -0.307368 |
| C | -3.617592 | -3.342836 | 1.989568  | H                                      | 7.224146  | 0.855270  | -1.205481 |
| H | -2.529201 | -3.902739 | 0.234888  | C                                      | 6.031827  | 1.957789  | 1.607757  |
| C | -2.665880 | -1.590450 | 3.332119  | H                                      | 7.014572  | 1.707142  | 2.009482  |
| H | -0.807993 | -0.772894 | 2.645840  | H                                      | 5.975196  | 3.049311  | 1.498534  |
| C | -3.679695 | -2.518437 | 3.108500  | H                                      | 5.272657  | 1.647414  | 2.340336  |
| H | -4.388133 | -4.092249 | 1.818888  | C                                      | 0.916345  | 1.724608  | -2.409369 |
| H | -2.684953 | -0.958291 | 4.218000  | C                                      | 0.478508  | -1.146275 | -3.117031 |
| H | -4.505223 | -2.609618 | 3.811422  | H                                      | 1.181998  | -0.580756 | -3.728623 |
| C | 1.294738  | -2.013672 | 1.169479  | C                                      | -0.916258 | -0.984862 | -3.405869 |
| C | 2.426726  | -1.273918 | 0.808720  | H                                      | -1.583810 | -1.770485 | -3.048572 |
| C | 1.333811  | -2.800877 | 2.328244  | C                                      | -1.504446 | 0.075792  | -4.045273 |
| C | 3.575230  | -1.314541 | 1.596449  | H                                      | -0.920917 | 0.891371  | -4.468981 |
| H | 2.399877  | -0.653082 | -0.091507 | H                                      | -2.583587 | 0.127048  | -4.168389 |
| C | 2.478672  | -2.832297 | 3.117474  | H                                      | 0.827792  | -2.145252 | -2.855155 |
| H | 0.461624  | -3.387285 | 2.613745  | H                                      | 0.929363  | 1.461194  | -3.467862 |
| C | 3.600180  | -2.088929 | 2.753782  | H                                      | 0.335628  | 2.626474  | -2.210233 |
| H | 4.450824  | -0.736412 | 1.304814  |                                        |           |           |           |
| H | 2.496155  | -3.443318 | 4.017533  | <b>IM7</b>                             |           |           |           |
| H | 4.494648  | -2.116451 | 3.373344  | SCF energy in MeCN: -2723.358017 a.u.  |           |           |           |
| C | -0.062023 | -3.537194 | -0.863709 | Free energy in MeCN: -2722.624973 a.u. |           |           |           |
| C | 1.096652  | -4.324134 | -0.857425 |                                        |           |           |           |
| C | -1.111422 | -3.898212 | -1.723505 | Pd                                     | 0.005734  | 0.098531  | -1.353279 |
| C | 1.193814  | -5.443202 | -1.681358 | P                                      | 0.639966  | -1.876749 | -0.161449 |
| H | 1.929812  | -4.063012 | -0.207213 | P                                      | 1.059740  | 1.698138  | 0.150943  |
| C | -1.015668 | -5.019777 | -2.538866 | C                                      | 0.169123  | -1.808506 | 1.610989  |
| H | -2.020589 | -3.296859 | -1.752632 | C                                      | 0.857778  | -2.461534 | 2.639672  |
| C | 0.141790  | -5.794670 | -2.521758 | C                                      | -0.945400 | -1.024833 | 1.938157  |
| H | 2.100112  | -6.045043 | -1.661796 | C                                      | 0.443298  | -2.326871 | 3.961528  |
| H | -1.844660 | -5.285683 | -3.191581 | H                                      | 1.743283  | -3.053490 | 2.413557  |

|   |           |           |           |   |           |           |           |
|---|-----------|-----------|-----------|---|-----------|-----------|-----------|
| C | -1.366153 | -0.897207 | 3.259109  | C | -1.149266 | 3.412883  | 3.200444  |
| H | -1.480438 | -0.498416 | 1.148811  | H | 0.941429  | 3.114958  | 2.780975  |
| C | -0.667930 | -1.544793 | 4.275586  | C | -2.457572 | 3.221976  | 2.760004  |
| H | 0.996168  | -2.830604 | 4.753389  | H | -3.709633 | 2.435093  | 1.181373  |
| H | -2.233685 | -0.278332 | 3.487377  | H | -0.959457 | 3.902319  | 4.154526  |
| H | -0.984361 | -1.439198 | 5.312236  | H | -3.293505 | 3.559094  | 3.371544  |
| C | 2.442922  | -2.223795 | -0.175546 | C | 1.751383  | 3.183643  | -0.674924 |
| C | 2.972219  | -3.456649 | 0.235013  | C | 1.575050  | 4.486735  | -0.203103 |
| C | 3.319103  | -1.243148 | -0.649618 | C | 2.510305  | 2.978532  | -1.834021 |
| C | 4.344196  | -3.680300 | 0.212070  | C | 2.153239  | 5.561350  | -0.874907 |
| H | 2.299646  | -4.253813 | 0.553127  | H | 0.974204  | 4.666113  | 0.687900  |
| C | 4.692768  | -1.467546 | -0.676437 | C | 3.093861  | 4.050380  | -2.500567 |
| H | 2.906552  | -0.301453 | -1.014444 | H | 2.618002  | 1.963577  | -2.223789 |
| C | 5.208309  | -2.682346 | -0.236573 | C | 2.914402  | 5.346021  | -2.020705 |
| H | 4.740770  | -4.640827 | 0.537169  | H | 2.004035  | 6.573192  | -0.501338 |
| H | 5.359262  | -0.688293 | -1.043913 | H | 3.674122  | 3.874920  | -3.404955 |
| H | 6.282315  | -2.860403 | -0.257053 | H | 3.360338  | 6.188680  | -2.546228 |
| C | -0.002374 | -3.512191 | -0.686837 | C | -5.023461 | 0.123478  | -0.111161 |
| C | -0.839757 | -4.306790 | 0.102293  | C | -4.190752 | -0.959954 | 0.231552  |
| C | 0.344582  | -3.959707 | -1.969771 | C | -3.118072 | -1.315736 | -0.571227 |
| C | -1.310221 | -5.528311 | -0.377377 | C | -2.772522 | -0.609622 | -1.738244 |
| H | -1.124238 | -3.973458 | 1.100380  | C | -3.643946 | 0.436687  | -2.093068 |
| C | -0.119357 | -5.180969 | -2.442620 | C | -4.728190 | 0.804605  | -1.307101 |
| H | 0.983430  | -3.338359 | -2.599494 | H | -4.381935 | -1.536629 | 1.134395  |
| C | -0.948936 | -5.969565 | -1.645982 | H | -2.495889 | -2.162340 | -0.271557 |
| H | -1.959565 | -6.137805 | 0.248952  | H | -3.463440 | 0.985156  | -3.017614 |
| H | 0.161512  | -5.515891 | -3.439721 | H | -5.350360 | 1.634475  | -1.633850 |
| H | -1.317117 | -6.923818 | -2.018364 | N | -6.106076 | 0.486898  | 0.692056  |
| C | 2.397180  | 1.327852  | 1.358395  | C | -6.778375 | 1.729899  | 0.405785  |
| C | 3.736396  | 1.607194  | 1.049173  | H | -7.604037 | 1.861479  | 1.110608  |
| C | 2.121011  | 0.624442  | 2.539707  | H | -6.119998 | 2.616577  | 0.473992  |
| C | 4.764994  | 1.182012  | 1.882875  | H | -7.205718 | 1.714703  | -0.604235 |
| H | 3.980898  | 2.161728  | 0.143540  | C | -6.107985 | 0.039461  | 2.064214  |
| C | 3.153015  | 0.193195  | 3.367269  | H | -6.978199 | 0.458066  | 2.577510  |
| H | 1.089988  | 0.416900  | 2.822304  | H | -6.187067 | -1.053199 | 2.123827  |
| C | 4.479185  | 0.462901  | 3.039924  | H | -5.198648 | 0.338520  | 2.619261  |
| H | 5.797040  | 1.412362  | 1.622010  | C | -1.534259 | -0.907509 | -2.475441 |
| H | 2.910912  | -0.356739 | 4.275927  | C | -0.500113 | 1.738843  | -2.675043 |
| H | 5.284984  | 0.122312  | 3.687940  | H | -1.591856 | 1.765048  | -2.756989 |
| C | -0.303934 | 2.335744  | 1.198116  | C | 0.150834  | 1.526178  | -3.968269 |
| C | -1.624890 | 2.155013  | 0.761411  | H | 1.239757  | 1.653082  | -3.985617 |
| C | -0.079339 | 2.975397  | 2.424500  | C | -0.445473 | 1.179013  | -5.122593 |
| C | -2.692657 | 2.596198  | 1.538075  | H | -1.527575 | 1.058953  | -5.189434 |
| H | -1.817420 | 1.641607  | -0.184790 | H | 0.119374  | 1.008333  | -6.036792 |



|                                        |           |           |           |                                       |           |           |           |
|----------------------------------------|-----------|-----------|-----------|---------------------------------------|-----------|-----------|-----------|
| H                                      | -0.162689 | 2.666159  | -2.197137 | C                                     | -1.756764 | 2.858532  | -2.768010 |
| H                                      | -1.507974 | -0.505536 | -3.492867 | H                                     | -2.281478 | 2.759661  | -0.683531 |
| H                                      | -1.295353 | -1.976816 | -2.486764 | C                                     | -1.366767 | 2.151732  | -3.900894 |
| <b>IM8</b>                             |           |           |           | H                                     | -0.835533 | 0.215555  | -4.693178 |
| SCF energy in MeCN: -2318.330913 a.u.  |           |           |           | H                                     | -1.910741 | 3.935386  | -2.822027 |
| Free energy in MeCN: -2317.788177 a.u. |           |           |           | H                                     | -1.209126 | 2.671802  | -4.844637 |
| C                                      | -0.814797 | -3.182969 | 1.573804  | P                                     | 1.884475  | -0.028047 | 0.153421  |
| H                                      | -1.528069 | -3.577072 | 0.847029  | C                                     | 3.494070  | -0.798182 | 0.585405  |
| H                                      | -1.197453 | -3.098252 | 2.590407  | C                                     | 3.589978  | -1.444166 | 1.824910  |
| C                                      | 0.571456  | -3.411161 | 1.379217  | C                                     | 4.617840  | -0.768722 | -0.247694 |
| H                                      | 1.234638  | -3.327796 | 2.243577  | C                                     | 4.780196  | -2.040447 | 2.226920  |
| C                                      | 1.155810  | -3.729658 | 0.147707  | H                                     | 2.710260  | -1.477767 | 2.470965  |
| H                                      | 0.539151  | -3.938847 | -0.725625 | C                                     | 5.806285  | -1.377476 | 0.149395  |
| P                                      | -1.916408 | -0.149437 | 0.086686  | H                                     | 4.562799  | -0.268324 | -1.214345 |
| C                                      | -2.522152 | 1.076638  | 1.307786  | C                                     | 5.890967  | -2.012817 | 1.385726  |
| C                                      | -1.712756 | 1.425583  | 2.393538  | H                                     | 4.838498  | -2.537710 | 3.193910  |
| C                                      | -3.786138 | 1.669679  | 1.182610  | H                                     | 6.671884  | -1.352287 | -0.510877 |
| C                                      | -2.148386 | 2.365847  | 3.325383  | H                                     | 6.820359  | -2.490229 | 1.692046  |
| H                                      | -0.737345 | 0.944863  | 2.498802  | C                                     | 2.047587  | 0.213279  | -1.657209 |
| C                                      | -4.221465 | 2.606022  | 2.112900  | C                                     | 2.211601  | 1.459347  | -2.268632 |
| H                                      | -4.428970 | 1.389485  | 0.347041  | C                                     | 1.987364  | -0.934539 | -2.462575 |
| C                                      | -3.400599 | 2.957566  | 3.184600  | C                                     | 2.316816  | 1.555119  | -3.655119 |
| H                                      | -1.507987 | 2.632188  | 4.164795  | H                                     | 2.257945  | 2.362374  | -1.661557 |
| H                                      | -5.204669 | 3.061423  | 2.005480  | C                                     | 2.111549  | -0.838022 | -3.843403 |
| H                                      | -3.743485 | 3.688962  | 3.914877  | H                                     | 1.843719  | -1.909359 | -1.989614 |
| C                                      | -3.439547 | -1.139105 | -0.176810 | C                                     | 2.274397  | 0.410203  | -4.444364 |
| C                                      | -3.889675 | -1.897495 | 0.915350  | H                                     | 2.437276  | 2.533554  | -4.118202 |
| C                                      | -4.151879 | -1.206841 | -1.379075 | H                                     | 2.074301  | -1.738809 | -4.454470 |
| C                                      | -5.021319 | -2.695485 | 0.809964  | H                                     | 2.362821  | 0.488700  | -5.526979 |
| H                                      | -3.338926 | -1.854377 | 1.856062  | C                                     | 2.056212  | 1.663608  | 0.829228  |
| C                                      | -5.281521 | -2.016764 | -1.485310 | C                                     | 3.202686  | 2.124940  | 1.487531  |
| H                                      | -3.831238 | -0.617764 | -2.237194 | C                                     | 0.957579  | 2.527036  | 0.709201  |
| C                                      | -5.719638 | -2.762439 | -0.395243 | C                                     | 3.243417  | 3.414587  | 2.012002  |
| H                                      | -5.356319 | -3.273539 | 1.669770  | H                                     | 4.069908  | 1.474328  | 1.590702  |
| H                                      | -5.825920 | -2.056491 | -2.427890 | C                                     | 1.003727  | 3.817475  | 1.222199  |
| H                                      | -6.602484 | -3.393497 | -0.481898 | H                                     | 0.057824  | 2.177435  | 0.200839  |
| Pd                                     | -0.000854 | -1.319661 | 0.717562  | C                                     | 2.148175  | 4.264638  | 1.880661  |
| C                                      | -1.765571 | 0.811407  | -1.464958 | H                                     | 4.141328  | 3.757467  | 2.524156  |
| C                                      | -1.339919 | 0.116169  | -2.608625 | H                                     | 0.135745  | 4.468242  | 1.119169  |
| C                                      | -1.964475 | 2.194395  | -1.560129 | H                                     | 2.185165  | 5.271872  | 2.292423  |
| C                                      | -1.161255 | 0.774935  | -3.817956 | H                                     | 2.234777  | -3.814275 | 0.038954  |
| H                                      | -1.138914 | -0.954936 | -2.538626 | <b>TS2a</b>                           |           |           |           |
|                                        |           |           |           | SCF energy in MeCN: -2723.211991 a.u. |           |           |           |

|                                       |           |           |           |   |           |           |           |
|---------------------------------------|-----------|-----------|-----------|---|-----------|-----------|-----------|
| Free energy in MeCN: -2722.48362 a.u. |           |           |           | P | 0.076937  | -1.592202 | -0.024230 |
|                                       |           |           |           | C | -1.563132 | -2.149709 | -0.616543 |
| C                                     | -0.295564 | 2.847496  | -0.457084 | C | -2.660248 | -2.082906 | 0.255633  |
| H                                     | 0.001118  | 3.062922  | -1.486531 | C | -1.781149 | -2.480786 | -1.957827 |
| H                                     | 0.041015  | 3.580799  | 0.273090  | C | -3.945022 | -2.343137 | -0.207237 |
| C                                     | -1.476885 | 2.106386  | -0.220178 | H | -2.504205 | -1.823705 | 1.303662  |
| H                                     | -1.967731 | 2.172352  | 0.752723  | C | -3.070791 | -2.739654 | -2.418099 |
| C                                     | -1.988873 | 1.193311  | -1.158082 | H | -0.939615 | -2.543624 | -2.647390 |
| H                                     | -1.521732 | 1.089515  | -2.136952 | C | -4.153800 | -2.669745 | -1.546989 |
| P                                     | 2.593404  | 1.165607  | 0.164762  | H | -4.788270 | -2.285540 | 0.479196  |
| C                                     | 2.940561  | 2.769271  | 0.966735  | H | -3.225699 | -3.005990 | -3.462133 |
| C                                     | 2.110469  | 3.186006  | 2.016618  | H | -5.160577 | -2.872506 | -1.909018 |
| C                                     | 4.033129  | 3.563554  | 0.604927  | C | 1.263713  | -2.398410 | -1.152956 |
| C                                     | 2.378622  | 4.366246  | 2.702372  | C | 1.861235  | -3.637416 | -0.900410 |
| H                                     | 1.247575  | 2.575071  | 2.294215  | C | 1.633511  | -1.684860 | -2.301057 |
| C                                     | 4.290057  | 4.752277  | 1.282944  | C | 2.814182  | -4.145710 | -1.779806 |
| H                                     | 4.683782  | 3.255921  | -0.212711 | H | 1.605144  | -4.193323 | 0.000816  |
| C                                     | 3.468952  | 5.152289  | 2.333557  | C | 2.579774  | -2.196733 | -3.182884 |
| H                                     | 1.732317  | 4.676841  | 3.521061  | H | 1.190037  | -0.703345 | -2.485515 |
| H                                     | 5.139069  | 5.366297  | 0.989631  | C | 3.176137  | -3.427876 | -2.918477 |
| H                                     | 3.674712  | 6.080375  | 2.863011  | H | 3.281327  | -5.106414 | -1.570549 |
| C                                     | 3.455838  | 1.230125  | -1.441641 | H | 2.859477  | -1.628040 | -4.067688 |
| C                                     | 2.730554  | 1.605721  | -2.579568 | H | 3.926211  | -3.827295 | -3.598053 |
| C                                     | 4.820422  | 0.940568  | -1.570474 | C | 0.251302  | -2.420368 | 1.585986  |
| C                                     | 3.353454  | 1.695261  | -3.820115 | C | -0.233808 | -3.719328 | 1.798889  |
| H                                     | 1.662991  | 1.815047  | -2.483741 | C | 0.889004  | -1.749017 | 2.634675  |
| C                                     | 5.441246  | 1.025260  | -2.813595 | C | -0.067107 | -4.335110 | 3.034502  |
| H                                     | 5.396465  | 0.643174  | -0.694910 | H | -0.751825 | -4.243036 | 0.995235  |
| C                                     | 4.710613  | 1.402160  | -3.938236 | C | 1.059633  | -2.370535 | 3.868731  |
| H                                     | 2.778654  | 1.988861  | -4.696252 | H | 1.254549  | -0.733191 | 2.479802  |
| H                                     | 6.501566  | 0.797299  | -2.902460 | C | 0.582549  | -3.662459 | 4.068979  |
| H                                     | 5.199311  | 1.467882  | -4.908301 | H | -0.447762 | -5.342340 | 3.192098  |
| Pd                                    | 0.285503  | 0.781054  | -0.124231 | H | 1.562642  | -1.839780 | 4.674709  |
| C                                     | 3.557782  | -0.022654 | 1.160260  | H | 0.709974  | -4.146396 | 5.035334  |
| C                                     | 3.895816  | -1.267742 | 0.609789  | H | -2.671435 | 0.404138  | -0.860382 |
| C                                     | 3.860805  | 0.231598  | 2.504247  | C | -3.812334 | 2.233656  | -2.165479 |
| C                                     | 4.517066  | -2.236667 | 1.390157  | C | -4.927941 | 1.878863  | -1.379651 |
| H                                     | 3.686399  | -1.472992 | -0.439580 | C | -5.338050 | 2.651708  | -0.262583 |
| C                                     | 4.482564  | -0.742594 | 3.280261  | C | -5.665192 | 0.693906  | -1.635898 |
| H                                     | 3.618517  | 1.197611  | 2.945618  | C | -6.405130 | 2.285046  | 0.524698  |
| C                                     | 4.806897  | -1.979292 | 2.728674  | H | -4.795709 | 3.568737  | -0.030891 |
| H                                     | 4.776201  | -3.196381 | 0.945874  | C | -6.734988 | 0.316657  | -0.857691 |
| H                                     | 4.721252  | -0.528641 | 4.320505  | H | -5.373442 | 0.068388  | -2.479938 |
| H                                     | 5.292148  | -2.738932 | 3.338244  | C | -7.142843 | 1.104084  | 0.249553  |

|                      |              |           |           |   |           |           |           |
|----------------------|--------------|-----------|-----------|---|-----------|-----------|-----------|
| H                    | -6.686838    | 2.919154  | 1.360630  | C | 3.718904  | 1.004250  | 1.271169  |
| H                    | -7.274729    | -0.593260 | -1.107832 | C | 3.446824  | 1.413866  | -1.091819 |
| N                    | -8.207751    | 0.737906  | 1.025138  | C | 5.099259  | 0.927544  | 1.090535  |
| C                    | -8.630168    | 1.577034  | 2.126203  | H | 3.301302  | 0.887595  | 2.269697  |
| H                    | -9.485887    | 1.115654  | 2.621372  | C | 4.823176  | 1.352937  | -1.266559 |
| H                    | -7.831879    | 1.696768  | 2.871213  | H | 2.796404  | 1.584308  | -1.952846 |
| H                    | -8.931609    | 2.576779  | 1.783706  | C | 5.655000  | 1.108005  | -0.173187 |
| C                    | -8.967261    | -0.450569 | 0.702560  | H | 5.742834  | 0.741713  | 1.948739  |
| H                    | -9.771383    | -0.572271 | 1.429741  | H | 5.249759  | 1.493421  | -2.258257 |
| H                    | -9.417819    | -0.387012 | -0.297732 | H | 6.734169  | 1.061643  | -0.307418 |
| H                    | -8.340000    | -1.352303 | 0.738165  | C | -3.112849 | 0.908125  | 0.298755  |
| H                    | -3.377677    | 3.226976  | -2.078234 | C | -4.047405 | 1.396455  | -0.622215 |
| H                    | -3.644228    | 1.723586  | -3.112523 | C | -2.768053 | 1.701738  | 1.404294  |
|                      |              |           |           | C | -4.623254 | 2.651964  | -0.438282 |
| <b>TS2b</b>          |              |           |           | H | -4.345539 | 0.790012  | -1.476150 |
| SCF energy in MeCN:  | -2723.197429 | a.u.      |           | C | -3.346074 | 2.952665  | 1.582917  |
| Free energy in MeCN: | -2722.470427 | a.u.      |           | H | -2.044546 | 1.333476  | 2.131392  |
|                      |              |           |           | C | -4.271922 | 3.434612  | 0.659142  |
| Pd                   | -0.035463    | -0.214562 | -1.047093 | H | -5.357874 | 3.014892  | -1.154499 |
| P                    | 1.058648     | 1.354999  | 0.316387  | H | -3.068068 | 3.551895  | 2.448552  |
| P                    | -2.148492    | -0.612981 | 0.021683  | H | -4.723633 | 4.414718  | 0.797334  |
| C                    | 0.722019     | 1.441108  | 2.104193  | C | -2.076963 | -1.397657 | 1.667274  |
| C                    | 0.309871     | 2.618980  | 2.740411  | C | -1.008133 | -2.250358 | 1.960795  |
| C                    | 0.826947     | 0.261624  | 2.853704  | C | -3.110027 | -1.254485 | 2.603526  |
| C                    | -0.002508    | 2.607629  | 4.097361  | C | -0.970277 | -2.954491 | 3.160029  |
| H                    | 0.216361     | 3.543679  | 2.172108  | H | -0.194228 | -2.347695 | 1.242927  |
| C                    | 0.522790     | 0.256327  | 4.210511  | C | -3.064789 | -1.949925 | 3.807809  |
| H                    | 1.142755     | -0.661106 | 2.361956  | H | -3.955165 | -0.603383 | 2.383830  |
| C                    | 0.098959     | 1.429042  | 4.832807  | C | -1.998326 | -2.803435 | 4.087228  |
| H                    | -0.326824    | 3.526802  | 4.582067  | H | -0.131140 | -3.616171 | 3.373445  |
| H                    | 0.601641     | -0.668808 | 4.778793  | H | -3.871251 | -1.830966 | 4.528572  |
| H                    | -0.151989    | 1.424220  | 5.891385  | H | -1.972166 | -3.351050 | 5.027418  |
| C                    | 0.679776     | 3.030289  | -0.304880 | C | -3.200805 | -1.754802 | -0.945730 |
| C                    | 1.608231     | 4.077569  | -0.227960 | C | -3.708321 | -2.941664 | -0.397610 |
| C                    | -0.590598    | 3.282226  | -0.840406 | C | -3.441873 | -1.486195 | -2.303169 |
| C                    | 1.267370     | 5.348859  | -0.679672 | C | -4.451050 | -3.819269 | -1.182947 |
| H                    | 2.598930     | 3.896320  | 0.187893  | H | -3.529128 | -3.181124 | 0.648734  |
| C                    | -0.930591    | 4.556574  | -1.283175 | C | -4.195419 | -2.358446 | -3.080197 |
| H                    | -1.315590    | 2.469642  | -0.909320 | H | -3.030275 | -0.586645 | -2.758213 |
| C                    | -0.000370    | 5.590450  | -1.206382 | C | -4.700609 | -3.530739 | -2.521541 |
| H                    | 1.995401     | 6.155222  | -0.617596 | H | -4.840709 | -4.734071 | -0.740795 |
| H                    | -1.922521    | 4.736908  | -1.693295 | H | -4.382421 | -2.125380 | -4.126650 |
| H                    | -0.261262    | 6.586129  | -1.559650 | H | -5.283930 | -4.218403 | -3.129997 |
| C                    | 2.879564     | 1.255854  | 0.181835  | C | 3.194373  | -2.908164 | -0.260008 |

|                                        |           |           |           |   |           |           |           |
|----------------------------------------|-----------|-----------|-----------|---|-----------|-----------|-----------|
| C                                      | 1.865377  | -3.382278 | -0.116148 | H | 2.756480  | -0.311470 | 5.098170  |
| C                                      | 0.865533  | -2.959867 | -0.968972 | H | 0.072204  | -3.284379 | 3.531472  |
| C                                      | 1.121971  | -2.062326 | -2.034807 | H | 1.146311  | -2.165042 | 5.479790  |
| C                                      | 2.457941  | -1.617288 | -2.185933 | C | 3.359940  | 0.970965  | 0.311796  |
| C                                      | 3.462023  | -2.020738 | -1.330540 | C | 4.748781  | 0.813385  | 0.249333  |
| H                                      | 1.621347  | -4.100520 | 0.662548  | C | 2.837303  | 2.248064  | 0.552987  |
| H                                      | -0.144823 | -3.356294 | -0.850562 | C | 5.591577  | 1.909886  | 0.417116  |
| H                                      | 2.692307  | -0.934338 | -3.003520 | H | 5.174576  | -0.173018 | 0.067455  |
| H                                      | 4.466061  | -1.635531 | -1.483694 | C | 3.678486  | 3.338015  | 0.745870  |
| N                                      | 4.180986  | -3.302734 | 0.600250  | H | 1.754788  | 2.381713  | 0.574950  |
| C                                      | 5.556668  | -2.928899 | 0.344320  | C | 5.060593  | 3.172510  | 0.670319  |
| H                                      | 6.191024  | -3.331697 | 1.135716  | H | 6.670542  | 1.774420  | 0.356507  |
| H                                      | 5.915745  | -3.322646 | -0.617684 | H | 3.251386  | 4.321058  | 0.939776  |
| H                                      | 5.677623  | -1.837803 | 0.334113  | H | 5.723001  | 4.026327  | 0.804895  |
| C                                      | 3.886508  | -4.248468 | 1.654102  | C | 3.200542  | -1.720339 | -0.643964 |
| H                                      | 4.779680  | -4.399663 | 2.262463  | C | 3.568942  | -2.917721 | -0.020657 |
| H                                      | 3.091075  | -3.871886 | 2.312598  | C | 3.542819  | -1.531118 | -1.993141 |
| H                                      | 3.569437  | -5.226069 | 1.261398  | C | 4.252237  | -3.903575 | -0.731371 |
| C                                      | 0.066560  | -1.642145 | -2.952898 | H | 3.320473  | -3.082533 | 1.027264  |
| C                                      | -0.668435 | 0.355754  | -3.346484 | C | 4.238037  | -2.508155 | -2.694641 |
| H                                      | -1.125765 | -0.128834 | -4.209209 | H | 3.253304  | -0.597908 | -2.483342 |
| C                                      | 0.484930  | 1.199278  | -3.608134 | C | 4.588423  | -3.704117 | -2.066780 |
| H                                      | 0.652391  | 2.018051  | -2.902652 | H | 4.529183  | -4.831336 | -0.232083 |
| C                                      | 1.350086  | 1.043021  | -4.630595 | H | 4.500664  | -2.341257 | -3.738432 |
| H                                      | 1.229874  | 0.254212  | -5.373982 | H | 5.120508  | -4.476969 | -2.618733 |
| H                                      | 2.191185  | 1.717328  | -4.772985 | C | -1.034104 | 2.586648  | 1.383021  |
| H                                      | -1.440737 | 0.829450  | -2.731479 | C | -1.557498 | 3.874596  | 1.539232  |
| H                                      | -0.855706 | -2.227501 | -2.930894 | C | -0.125844 | 2.110211  | 2.338721  |
| H                                      | 0.437999  | -1.485955 | -3.963637 | C | -1.159156 | 4.672530  | 2.610606  |
|                                        |           |           |           | H | -2.284315 | 4.257474  | 0.823471  |
|                                        |           |           |           | C | 0.262560  | 2.901350  | 3.413155  |
|                                        |           |           |           | H | 0.283965  | 1.103233  | 2.228453  |
|                                        |           |           |           | C | -0.248028 | 4.191356  | 3.547397  |
|                                        |           |           |           | H | -1.570615 | 5.675600  | 2.715736  |
|                                        |           |           |           | H | 0.973863  | 2.508649  | 4.139043  |
|                                        |           |           |           | H | 0.060368  | 4.819048  | 4.382003  |
|                                        |           |           |           | C | -2.702382 | 0.393199  | 0.989519  |
|                                        |           |           |           | C | -2.304509 | -0.887589 | 1.381595  |
|                                        |           |           |           | C | -3.941269 | 0.880870  | 1.424116  |
|                                        |           |           |           | C | -3.116382 | -1.663451 | 2.205070  |
|                                        |           |           |           | H | -1.347214 | -1.269723 | 1.020275  |
|                                        |           |           |           | C | -4.765425 | 0.095970  | 2.224356  |
|                                        |           |           |           | H | -4.258719 | 1.884096  | 1.136048  |
|                                        |           |           |           | C | -4.350289 | -1.174898 | 2.624282  |
| <b>TS2c</b>                            |           |           |           |   |           |           |           |
| SCF energy in MeCN: -2723.31607 a.u.   |           |           |           |   |           |           |           |
| Free energy in MeCN: -2722.588875 a.u. |           |           |           |   |           |           |           |
| Pd                                     | 0.175801  | 0.153702  | -1.002640 |   |           |           |           |
| P                                      | 2.171104  | -0.412030 | 0.123951  |   |           |           |           |
| P                                      | -1.486469 | 1.400088  | 0.046489  |   |           |           |           |
| C                                      | 1.972228  | -0.997867 | 1.852811  |   |           |           |           |
| C                                      | 2.582098  | -0.387685 | 2.955551  |   |           |           |           |
| C                                      | 1.064563  | -2.043740 | 2.083338  |   |           |           |           |
| C                                      | 2.280668  | -0.804499 | 4.251240  |   |           |           |           |
| H                                      | 3.287322  | 0.429135  | 2.802600  |   |           |           |           |
| C                                      | 0.780649  | -2.471027 | 3.374606  |   |           |           |           |
| H                                      | 0.564254  | -2.511242 | 1.231224  |   |           |           |           |
| C                                      | 1.382033  | -1.845148 | 4.466207  |   |           |           |           |

|   |           |           |           |                         |           |           |                                       |
|---|-----------|-----------|-----------|-------------------------|-----------|-----------|---------------------------------------|
| H | -2.787354 | -2.658657 | 2.505901  | <b>Ir<sup>III</sup></b> |           |           |                                       |
| H | -5.728849 | 0.483015  | 2.553231  |                         |           |           | SCF energy in MeCN: -1557.653878 a.u. |
| H | -4.991702 | -1.781403 | 3.262707  |                         |           |           | Free energy in MeCN: -1557.23251 a.u. |
| C | -2.497227 | 2.379420  | -1.117599 | Ir                      | 0.067384  | -0.030941 | 0.002917                              |
| C | -3.676815 | 1.861682  | -1.673867 | C                       | 1.778346  | 0.215271  | 1.041953                              |
| C | -1.963555 | 3.554602  | -1.672934 | C                       | 2.633512  | 1.234303  | 0.544136                              |
| C | -4.307963 | 2.505769  | -2.733857 | C                       | 2.174359  | -0.454010 | 2.205647                              |
| H | -4.098926 | 0.938929  | -1.274605 | C                       | 3.826398  | 1.560682  | 1.206218                              |
| C | -2.598823 | 4.200063  | -2.728356 | C                       | 3.360240  | -0.122320 | 2.858765                              |
| H | -1.033080 | 3.962756  | -1.274885 | H                       | 1.555667  | -1.255502 | 2.610008                              |
| C | -3.774881 | 3.678431  | -3.264271 | C                       | 4.188178  | 0.886294  | 2.362806                              |
| H | -5.225644 | 2.088707  | -3.146729 | H                       | 4.476662  | 2.345014  | 0.819768                              |
| H | -2.168749 | 5.112687  | -3.138299 | H                       | 3.646386  | -0.660241 | 3.761488                              |
| H | -4.269713 | 4.180732  | -4.093405 | H                       | 5.113601  | 1.138334  | 2.875154                              |
| C | -2.501367 | -3.461612 | -0.665564 | C                       | 2.186189  | 1.895595  | -0.669228                             |
| C | -1.102906 | -3.646587 | -0.642357 | C                       | 2.883048  | 2.882556  | -1.376342                             |
| C | -0.260353 | -2.823653 | -1.376965 | C                       | 2.353323  | 3.417737  | -2.538128                             |
| C | -0.762052 | -1.787601 | -2.194408 | H                       | 3.849899  | 3.216123  | -1.009510                             |
| C | -2.165358 | -1.617395 | -2.210389 | C                       | 0.460690  | 1.990927  | -2.262446                             |
| C | -3.012680 | -2.420642 | -1.473198 | C                       | 1.115425  | 2.963900  | -2.995384                             |
| H | -0.664759 | -4.442973 | -0.044816 | H                       | 2.899967  | 4.179769  | -3.088673                             |
| H | 0.817045  | -3.001033 | -1.354970 | H                       | -0.499449 | 1.586403  | -2.575841                             |
| H | -2.583867 | -0.819762 | -2.827186 | H                       | 0.665287  | 3.351688  | -3.904324                             |
| H | -4.083191 | -2.231849 | -1.507035 | C                       | -2.823160 | 0.870412  | -0.566746                             |
| N | -3.343337 | -4.262259 | 0.079119  | C                       | -2.225803 | -0.843706 | -2.027915                             |
| C | -4.757276 | -3.978225 | 0.111679  | C                       | -4.101270 | 0.921056  | -1.128437                             |
| H | -5.249812 | -4.684142 | 0.784927  | C                       | -3.477257 | -0.839989 | -2.627651                             |
| H | -4.966007 | -2.957478 | 0.471186  | H                       | -1.436382 | -1.526598 | -2.341522                             |
| H | -5.214600 | -4.087659 | -0.882910 | C                       | -4.431883 | 0.061299  | -2.166949                             |
| C | -2.783903 | -5.241564 | 0.972919  | H                       | -4.840259 | 1.623231  | -0.753347                             |
| H | -3.590469 | -5.746137 | 1.510145  | H                       | -3.693098 | -1.532534 | -3.436255                             |
| H | -2.208302 | -6.007065 | 0.431374  | H                       | -5.425007 | 0.093850  | -2.608099                             |
| H | -2.106115 | -4.788929 | 1.718311  | C                       | -2.393566 | 1.743636  | 0.539842                              |
| C | 0.093962  | -0.972567 | -3.060302 | C                       | -3.208407 | 2.736418  | 1.088678                              |
| C | 0.460588  | 1.182392  | -3.194081 | C                       | -2.732938 | 3.519171  | 2.131836                              |
| H | 0.805522  | 0.865919  | -4.179866 | H                       | -4.209341 | 2.903536  | 0.701348                              |
| C | 1.445559  | 2.040016  | -2.547990 | C                       | -0.683350 | 2.297141  | 2.022232                              |
| H | 1.098913  | 2.662872  | -1.717901 | C                       | -1.445272 | 3.297083  | 2.610198                              |
| C | 2.744319  | 2.113779  | -2.905572 | H                       | -3.361073 | 4.294353  | 2.563760                              |
| H | 3.137825  | 1.511266  | -3.725914 | H                       | 0.331638  | 2.074851  | 2.351161                              |
| H | 3.451096  | 2.755624  | -2.384971 | H                       | -1.031785 | 3.886795  | 3.423385                              |
| H | -0.562480 | 1.566860  | -3.238414 | C                       | -0.225688 | -2.880572 | 0.673700                              |
| H | -0.410444 | -0.733176 | -3.995761 | C                       | -1.339897 | -1.548810 | 2.257989                              |
| H | 1.097156  | -1.369901 | -3.233112 | C                       | -0.615806 | -4.027482 | 1.375389                              |



Free energy in MeCN: -1557.337141 a.u.

|   |           |           |           |
|---|-----------|-----------|-----------|
| N | -0.248299 | -1.728153 | -1.134373 |
| N | 0.608358  | 1.635544  | 1.130393  |
| C | 1.211706  | -1.347007 | 1.020027  |
| C | 1.986915  | -1.123940 | 2.167250  |
| C | 2.655952  | -2.164496 | 2.806322  |
| C | 2.576767  | -3.470142 | 2.314245  |
| C | 1.829103  | -3.724257 | 1.174501  |
| C | 1.154946  | -2.679166 | 0.525732  |
| C | 0.360984  | -2.866123 | -0.675860 |
| C | 0.195630  | -4.065628 | -1.377850 |
| C | -0.577472 | -4.105434 | -2.525742 |
| C | -1.190900 | -2.934513 | -2.972713 |
| C | -1.001152 | -1.770991 | -2.247913 |
| C | 1.707687  | 0.611111  | -1.028499 |
| C | 2.283010  | 0.048560  | -2.177461 |
| C | 3.370147  | 0.643914  | -2.811939 |
| C | 3.926117  | 1.825326  | -2.313530 |
| C | 3.390669  | 2.401371  | -1.171761 |
| C | 2.296937  | 1.804744  | -0.527419 |
| C | 1.689301  | 2.343838  | 0.676441  |
| C | 2.119669  | 3.471117  | 1.385648  |
| C | 1.459128  | 3.871464  | 2.534664  |
| C | 0.357434  | 3.137391  | 2.975648  |
| C | -0.033537 | 2.029334  | 2.244768  |
| H | 2.070019  | -0.113327 | 2.571208  |
| H | 3.098444  | -4.281275 | 2.818390  |
| H | 0.685126  | -4.965162 | -1.012952 |
| H | -0.702346 | -5.039269 | -3.070202 |
| H | -1.449223 | -0.824233 | -2.541496 |
| H | 1.873097  | -0.876981 | -2.585924 |
| H | 4.773726  | 2.288906  | -2.814461 |
| H | 2.982286  | 4.026040  | 1.025298  |
| H | 1.798133  | 4.746851  | 3.084921  |
| H | -0.881868 | 1.412744  | 2.533931  |
| C | -2.897282 | 0.290541  | 0.572750  |
| C | -4.143814 | 0.131921  | 1.231974  |
| C | -4.265112 | -0.695721 | 2.320015  |
| C | -3.131496 | -1.400679 | 2.788150  |
| C | -1.936346 | -1.210730 | 2.122601  |
| N | -1.791878 | -0.398532 | 1.061651  |
| H | -5.010119 | 0.681299  | 0.870018  |
| H | -3.184454 | -2.072973 | 3.639266  |

|    |           |           |           |
|----|-----------|-----------|-----------|
| H  | -1.023146 | -1.717902 | 2.438487  |
| C  | -2.689235 | 1.125358  | -0.563829 |
| C  | -3.714289 | 1.859849  | -1.213956 |
| C  | -1.140985 | 1.990310  | -2.123214 |
| C  | -3.435371 | 2.647411  | -2.302577 |
| H  | -4.734860 | 1.788984  | -0.844412 |
| H  | -0.098611 | 2.002990  | -2.446234 |
| C  | -2.106234 | 2.728010  | -2.780234 |
| H  | -1.838205 | 3.346487  | -3.631642 |
| N  | -1.392539 | 1.205152  | -1.061701 |
| Ir | 0.082940  | -0.019700 | -0.004055 |
| H  | -0.194075 | 3.415136  | 3.869246  |
| H  | -5.227138 | -0.804323 | 2.817549  |
| H  | -4.232905 | 3.202642  | -2.792944 |
| H  | -1.809191 | -2.918053 | -3.865621 |
| H  | 1.768511  | -4.743087 | 0.790201  |
| H  | 3.793542  | 0.183869  | -3.704853 |
| H  | 3.825893  | 3.322646  | -0.783009 |
| H  | 3.248219  | -1.959656 | 3.698208  |

#### IM1'

SCF energy in MeCN: -3413.544595 a.u.

Free energy in MeCN: -3412.625188 a.u.

|   |           |           |           |
|---|-----------|-----------|-----------|
| C | -1.160955 | 0.427161  | 0.273518  |
| H | -0.968381 | -0.533813 | -0.221636 |
| H | -1.176710 | 1.201087  | -0.503639 |
| C | -0.191075 | 0.706983  | 1.368175  |
| H | -0.239608 | 1.719847  | 1.778876  |
| C | 0.294383  | -0.331377 | 2.195203  |
| H | -0.036233 | -1.360663 | 2.032518  |
| P | 2.339994  | 1.514084  | -1.096637 |
| C | 2.464740  | 3.306659  | -0.737629 |
| C | 2.018016  | 3.770255  | 0.504918  |
| C | 2.977721  | 4.228041  | -1.661166 |
| C | 2.073460  | 5.126643  | 0.817328  |
| H | 1.630353  | 3.047212  | 1.225557  |
| C | 3.033458  | 5.582129  | -1.348470 |
| H | 3.337416  | 3.876416  | -2.628535 |
| C | 2.580749  | 6.033397  | -0.109069 |
| H | 1.723285  | 5.474226  | 1.787748  |
| H | 3.432341  | 6.289258  | -2.073950 |
| H | 2.627771  | 7.093503  | 0.134606  |
| C | 0.950996  | 1.382258  | -2.281825 |

|    |           |           |           |   |           |           |           |
|----|-----------|-----------|-----------|---|-----------|-----------|-----------|
| C  | 0.507828  | 0.090073  | -2.605383 | C | 4.526193  | -3.140552 | -3.160812 |
| C  | 0.241477  | 2.481293  | -2.775543 | H | 6.550575  | -2.440509 | -2.928650 |
| C  | -0.613609 | -0.097737 | -3.403048 | H | 2.439608  | -3.691452 | -3.114467 |
| H  | 1.041113  | -0.772015 | -2.196697 | H | 4.702838  | -3.575112 | -4.143459 |
| C  | -0.890322 | 2.289725  | -3.566468 | C | 5.209668  | -0.543616 | 1.595818  |
| H  | 0.559805  | 3.492644  | -2.526114 | C | 6.326327  | -1.320288 | 1.931039  |
| C  | -1.321226 | 1.004646  | -3.879151 | C | 5.283475  | 0.845472  | 1.743299  |
| H  | -0.959479 | -1.105712 | -3.624750 | C | 7.496572  | -0.717208 | 2.379899  |
| H  | -1.443457 | 3.154188  | -3.930549 | H | 6.272825  | -2.406252 | 1.842512  |
| H  | -2.218492 | 0.858184  | -4.477231 | C | 6.455248  | 1.450717  | 2.191540  |
| Pd | 1.821339  | 0.170924  | 0.781354  | H | 4.401758  | 1.446548  | 1.506795  |
| O  | -2.502046 | 0.362405  | 0.856513  | C | 7.563636  | 0.669691  | 2.507299  |
| C  | -3.474407 | -0.068387 | 0.045153  | H | 8.358496  | -1.330720 | 2.636977  |
| O  | -3.313405 | -0.398880 | -1.112801 | H | 6.498389  | 2.533178  | 2.302098  |
| C  | 3.824076  | 1.258389  | -2.147955 | H | 8.479321  | 1.139467  | 2.863018  |
| C  | 3.780054  | 0.629632  | -3.396429 | H | 0.606039  | -0.113390 | 3.217761  |
| C  | 5.069788  | 1.660817  | -1.643039 | C | -4.821099 | -0.067400 | 0.766538  |
| C  | 4.949998  | 0.420260  | -4.123186 | H | -5.259461 | 0.920192  | 0.546037  |
| H  | 2.825386  | 0.305596  | -3.809111 | N | -5.688285 | -1.041597 | 0.127141  |
| C  | 6.235794  | 1.450980  | -2.369150 | C | -4.703738 | -0.182001 | 2.305598  |
| H  | 5.123669  | 2.159299  | -0.675063 | H | -3.905649 | -0.886748 | 2.571690  |
| C  | 6.179155  | 0.830879  | -3.616396 | H | -5.645158 | -0.621738 | 2.669928  |
| H  | 4.895620  | -0.070025 | -5.094516 | C | -5.295511 | -2.426232 | 0.351731  |
| H  | 7.191018  | 1.777101  | -1.959615 | H | -4.196300 | -2.456588 | 0.364521  |
| H  | 7.090852  | 0.666080  | -4.188872 | H | -5.628779 | -2.805153 | 1.340717  |
| P  | 3.643116  | -1.277980 | 0.989380  | C | -7.100880 | -0.825103 | 0.366855  |
| C  | 3.505093  | -2.768914 | 2.055169  | H | -7.629155 | -1.664933 | -0.111339 |
| C  | 2.906332  | -2.616204 | 3.312694  | H | -7.368926 | -0.887239 | 1.445925  |
| C  | 3.982672  | -4.031590 | 1.684292  | C | -5.802611 | -3.327158 | -0.741503 |
| C  | 2.802164  | -3.694255 | 4.184688  | C | -5.546532 | -2.993938 | -2.076330 |
| H  | 2.516128  | -1.638075 | 3.597880  | C | -6.512727 | -4.492845 | -0.455872 |
| C  | 3.866983  | -5.113401 | 2.553910  | C | -5.987103 | -3.822561 | -3.101538 |
| H  | 4.447004  | -4.171089 | 0.708146  | H | -4.994655 | -2.076857 | -2.284017 |
| C  | 3.279565  | -4.947448 | 3.805227  | C | -6.955527 | -5.323939 | -1.483247 |
| H  | 2.337133  | -3.558853 | 5.159797  | H | -6.722127 | -4.748699 | 0.584001  |
| H  | 4.239497  | -6.090807 | 2.250664  | C | -6.692432 | -4.989995 | -2.808232 |
| H  | 3.189106  | -5.794656 | 4.482987  | H | -5.780282 | -3.559106 | -4.137954 |
| C  | 4.074118  | -2.013723 | -0.632318 | H | -7.512683 | -6.229377 | -1.247133 |
| C  | 5.339820  | -1.950082 | -1.220969 | H | -7.039192 | -5.636053 | -3.613410 |
| C  | 3.032629  | -2.639022 | -1.335912 | C | -7.612353 | 0.471608  | -0.199819 |
| C  | 5.561152  | -2.509370 | -2.478502 | C | -8.666660 | 1.140994  | 0.425276  |
| H  | 6.156688  | -1.447870 | -0.704961 | C | -7.070578 | 1.009336  | -1.371982 |
| C  | 3.257425  | -3.203726 | -2.586002 | C | -9.186196 | 2.314432  | -0.114157 |
| H  | 2.037390  | -2.684833 | -0.887372 | H | -9.082942 | 0.733454  | 1.348187  |



|   |            |          |           |   |           |           |           |
|---|------------|----------|-----------|---|-----------|-----------|-----------|
| C | -7.583298  | 2.187217 | -1.906998 | H | 4.643863  | 1.115117  | 1.371586  |
| H | -6.231284  | 0.496052 | -1.842993 | C | 6.412447  | 0.982883  | 0.237810  |
| C | -8.645099  | 2.840550 | -1.284225 | H | 6.898139  | 1.074115  | -0.733388 |
| H | -10.009139 | 2.823354 | 0.385304  | H | 7.046893  | 0.702370  | 1.074812  |
| H | -7.150576  | 2.599071 | -2.817711 | N | 0.081066  | 0.507669  | -0.007906 |
| H | -9.043586  | 3.762233 | -1.705195 | C | -0.544171 | 1.823313  | 0.058334  |
| C | -4.489618  | 1.138970 | 2.988788  | C | 0.773276  | 0.148111  | 1.227261  |
| C | -3.307702  | 1.436303 | 3.670485  | H | 1.737309  | 0.680774  | 1.348332  |
| C | -5.492766  | 2.113534 | 2.934758  | H | 0.125196  | 0.489312  | 2.047327  |
| C | -3.133579  | 2.672601 | 4.286784  | C | -1.746762 | 1.808237  | 0.966730  |
| H | -2.511070  | 0.692734 | 3.697960  | C | -2.655258 | 0.745966  | 0.901634  |
| C | -5.321262  | 3.351207 | 3.546355  | C | -1.992570 | 2.850621  | 1.860853  |
| H | -6.420875  | 1.895606 | 2.399514  | C | -3.791232 | 0.737755  | 1.702699  |
| C | -4.139287  | 3.634417 | 4.227096  | H | -2.453709 | -0.075350 | 0.214672  |
| H | -2.204166  | 2.886640 | 4.813463  | C | -3.129786 | 2.843249  | 2.666566  |
| H | -6.113358  | 4.096621 | 3.491261  | H | -1.283122 | 3.676978  | 1.925778  |
| H | -4.002002  | 4.602275 | 4.706726  | C | -4.033488 | 1.787390  | 2.587861  |

### 1a'

SCF energy in MeCN: -1212.499006 a.u.

Free energy in MeCN: -1212.085088 a.u.

|   |           |           |           |
|---|-----------|-----------|-----------|
| C | -2.661766 | -2.365188 | -1.540554 |
| C | -1.435390 | -1.748896 | -1.764474 |
| C | -1.368885 | -0.453834 | -2.289314 |
| C | -2.563889 | 0.201193  | -2.593015 |
| C | -3.795572 | -0.415148 | -2.379602 |
| C | -3.848479 | -1.699325 | -1.847045 |
| H | -2.691216 | -3.370054 | -1.120071 |
| H | -0.515201 | -2.272070 | -1.500884 |
| H | -2.526407 | 1.216590  | -2.990401 |
| H | -4.714946 | 0.116775  | -2.619068 |
| H | -4.808903 | -2.180808 | -1.670325 |
| C | -0.047121 | 0.235736  | -2.479949 |
| H | 0.525460  | -0.236230 | -3.292306 |
| H | -0.201035 | 1.274355  | -2.799406 |
| C | 0.835941  | 0.214863  | -1.228513 |
| C | 1.985430  | 1.200305  | -1.373942 |
| O | 1.893532  | 2.309837  | -1.858247 |
| O | 3.104174  | 0.726381  | -0.779127 |
| C | 4.211868  | 1.654714  | -0.707722 |
| H | 4.723767  | 1.669499  | -1.678425 |
| H | 3.799294  | 2.657954  | -0.537407 |
| C | 5.110322  | 1.215765  | 0.388927  |

|   |           |           |           |
|---|-----------|-----------|-----------|
| H | 4.643863  | 1.115117  | 1.371586  |
| C | 6.412447  | 0.982883  | 0.237810  |
| H | 6.898139  | 1.074115  | -0.733388 |
| H | 7.046893  | 0.702370  | 1.074812  |
| N | 0.081066  | 0.507669  | -0.007906 |
| C | -0.544171 | 1.823313  | 0.058334  |
| C | 0.773276  | 0.148111  | 1.227261  |
| H | 1.737309  | 0.680774  | 1.348332  |
| H | 0.125196  | 0.489312  | 2.047327  |
| C | -1.746762 | 1.808237  | 0.966730  |
| C | -2.655258 | 0.745966  | 0.901634  |
| C | -1.992570 | 2.850621  | 1.860853  |
| C | -3.791232 | 0.737755  | 1.702699  |
| H | -2.453709 | -0.075350 | 0.214672  |
| C | -3.129786 | 2.843249  | 2.666566  |
| H | -1.283122 | 3.676978  | 1.925778  |
| C | -4.033488 | 1.787390  | 2.587861  |
| H | -4.491886 | -0.094046 | 1.632812  |
| H | -3.305481 | 3.662129  | 3.362672  |
| H | -4.921472 | 1.779793  | 3.217810  |
| C | 0.980446  | -1.336182 | 1.338410  |
| C | -0.134996 | -2.180091 | 1.366362  |
| C | 2.255512  | -1.899030 | 1.405657  |
| C | 0.021548  | -3.557122 | 1.470615  |
| H | -1.129536 | -1.737047 | 1.296966  |
| C | 2.415694  | -3.279693 | 1.514058  |
| H | 3.128227  | -1.246475 | 1.359181  |
| C | 1.299774  | -4.110645 | 1.547571  |
| H | -0.855164 | -4.203057 | 1.496750  |
| H | 3.416021  | -3.706720 | 1.566248  |
| H | 1.423908  | -5.189077 | 1.631384  |
| H | 0.163497  | 2.618061  | 0.368926  |
| H | 1.256644  | -0.789299 | -1.082644 |
| H | -0.856605 | 2.093307  | -0.959903 |

### 2a'

SCF energy in MeCN: -1023.874812 a.u.

Free energy in MeCN: -1023.470918 a.u.

|   |          |           |          |
|---|----------|-----------|----------|
| C | 2.616504 | 0.043957  | 3.538184 |
| H | 2.934195 | -0.966547 | 3.279670 |
| H | 3.381984 | 0.708019  | 3.933461 |
| C | 1.351884 | 0.435311  | 3.376863 |
| H | 1.079108 | 1.457096  | 3.659505 |

|   |           |           |           |                                      |           |           |           |
|---|-----------|-----------|-----------|--------------------------------------|-----------|-----------|-----------|
| C | 0.248942  | -0.428206 | 2.859149  | C                                    | -3.674581 | 2.576509  | -1.490859 |
| H | 0.637776  | -1.434532 | 2.651476  | H                                    | -2.318680 | 4.234658  | -1.730252 |
| H | -0.513896 | -0.537570 | 3.648127  | H                                    | -4.858283 | 0.846772  | -0.983512 |
| C | -0.479320 | 0.064267  | 1.593203  | H                                    | -4.294022 | 2.852217  | -2.342366 |
| H | -1.275205 | -0.671824 | 1.409242  |                                      |           |           |           |
| C | -1.165835 | 1.424754  | 1.823764  | <b>IM4'</b>                          |           |           |           |
| H | -1.742700 | 1.350145  | 2.759250  | SCF energy in MeCN: -3224.77204 a.u. |           |           |           |
| H | -0.408349 | 2.202452  | 1.999076  | Free energy in MeCN: -3223.8616 a.u. |           |           |           |
| N | 0.399147  | -0.019965 | 0.419876  |                                      |           |           |           |
| C | 1.279631  | 1.119149  | 0.208764  | C                                    | -0.071843 | -2.475900 | 0.599993  |
| H | 0.757824  | 1.967186  | -0.281689 | H                                    | -0.115049 | -2.603456 | 1.683757  |
| H | 1.598930  | 1.479749  | 1.196036  | H                                    | 0.492013  | -3.225903 | 0.048226  |
| C | -0.253762 | -0.425573 | -0.823875 | C                                    | -0.959622 | -1.635127 | -0.030453 |
| H | 0.542700  | -0.467700 | -1.583409 | H                                    | -1.014473 | -1.662751 | -1.122763 |
| H | -0.984751 | 0.320522  | -1.192745 | C                                    | -2.026042 | -0.855889 | 0.659448  |
| C | 2.499770  | 0.756008  | -0.595468 | H                                    | -1.862518 | -0.877133 | 1.747396  |
| C | 2.921202  | 1.555273  | -1.658639 | P                                    | 3.147491  | -1.423781 | -0.053769 |
| C | 3.243474  | -0.384025 | -0.274129 | C                                    | 2.986850  | -2.933783 | -1.061830 |
| C | 4.066125  | 1.233208  | -2.383597 | C                                    | 2.065118  | -2.937254 | -2.120089 |
| H | 2.336468  | 2.437357  | -1.923734 | C                                    | 3.748464  | -4.080408 | -0.812613 |
| C | 4.387108  | -0.708841 | -0.995243 | C                                    | 1.924646  | -4.062141 | -2.925450 |
| H | 2.899059  | -1.014931 | 0.545457  | H                                    | 1.446473  | -2.051997 | -2.298551 |
| C | 4.803005  | 0.099879  | -2.052272 | C                                    | 3.594863  | -5.208399 | -1.614371 |
| H | 4.377316  | 1.863854  | -3.215105 | H                                    | 4.459682  | -4.094573 | 0.012202  |
| H | 4.958134  | -1.598774 | -0.734193 | C                                    | 2.688312  | -5.200595 | -2.670983 |
| H | 5.695586  | -0.158024 | -2.619909 | H                                    | 1.210815  | -4.056311 | -3.746951 |
| C | -0.907305 | -1.775485 | -0.721439 | H                                    | 4.187774  | -6.097533 | -1.410456 |
| C | -2.190137 | -1.992005 | -1.227690 | H                                    | 2.571315  | -6.084506 | -3.294389 |
| C | -0.229706 | -2.845408 | -0.126063 | C                                    | 3.943822  | -1.948660 | 1.495790  |
| C | -2.782511 | -3.251074 | -1.151073 | C                                    | 3.128862  | -2.327039 | 2.571274  |
| H | -2.726818 | -1.157947 | -1.682620 | C                                    | 5.336075  | -2.023107 | 1.634512  |
| C | -0.820838 | -4.100807 | -0.041620 | C                                    | 3.692653  | -2.774019 | 3.761329  |
| H | 0.768154  | -2.670395 | 0.276745  | H                                    | 2.044379  | -2.259469 | 2.468005  |
| C | -2.100523 | -4.308084 | -0.555354 | C                                    | 5.897148  | -2.463514 | 2.829785  |
| H | -3.783634 | -3.404134 | -1.551705 | H                                    | 5.981156  | -1.737783 | 0.804698  |
| H | -0.281930 | -4.923809 | 0.425727  | C                                    | 5.078800  | -2.838445 | 3.892897  |
| H | -2.564665 | -5.290726 | -0.487853 | H                                    | 3.050742  | -3.067848 | 4.589455  |
| C | -2.064941 | 1.849895  | 0.696465  | H                                    | 6.979335  | -2.517929 | 2.928191  |
| C | -1.775467 | 2.986391  | -0.063074 | H                                    | 5.521066  | -3.183591 | 4.825194  |
| C | -3.193027 | 1.094984  | 0.354443  | Pd                                   | 0.992779  | -0.466237 | 0.205870  |
| C | -2.568111 | 3.348567  | -1.148754 | C                                    | 4.387694  | -0.415386 | -0.923056 |
| H | -0.905270 | 3.589723  | 0.199345  | C                                    | 5.041259  | 0.617850  | -0.232877 |
| C | -3.988694 | 1.451738  | -0.729730 | C                                    | 4.609786  | -0.562906 | -2.299269 |
| H | -3.440372 | 0.204630  | 0.935093  | C                                    | 5.891339  | 1.485834  | -0.908869 |

|   |           |           |           |   |           |           |           |
|---|-----------|-----------|-----------|---|-----------|-----------|-----------|
| H | 4.896075  | 0.731418  | 0.841335  | C | -4.090549 | -2.006657 | 1.603554  |
| C | 5.465218  | 0.307128  | -2.968476 | H | -3.470072 | -2.863442 | 1.909697  |
| H | 4.119605  | -1.365818 | -2.848457 | H | -4.002193 | -1.274778 | 2.419493  |
| C | 6.101946  | 1.336578  | -2.278452 | N | -4.345180 | -0.499110 | -0.340829 |
| H | 6.393199  | 2.279868  | -0.358503 | C | -4.601691 | 0.751569  | 0.339211  |
| H | 5.640260  | 0.174243  | -4.034623 | H | -4.574692 | 0.538556  | 1.420376  |
| H | 6.767703  | 2.016756  | -2.805798 | C | -4.313592 | -0.484233 | -1.799384 |
| P | 1.450062  | 1.822497  | 0.432005  | C | -5.531756 | -2.395571 | 1.436712  |
| C | -0.069559 | 2.574975  | 1.112752  | C | -6.519191 | -1.791348 | 2.216982  |
| C | -1.014112 | 3.174586  | 0.266425  | C | -5.925169 | -3.322148 | 0.464849  |
| C | -0.374312 | 2.432128  | 2.473867  | C | -7.866120 | -2.094953 | 2.032697  |
| C | -2.222107 | 3.639456  | 0.777395  | H | -6.227660 | -1.060574 | 2.973075  |
| H | -0.794136 | 3.299534  | -0.793464 | C | -7.268622 | -3.625588 | 0.273214  |
| C | -1.588378 | 2.888305  | 2.976913  | H | -5.168536 | -3.808322 | -0.153940 |
| H | 0.349402  | 1.973266  | 3.147541  | C | -8.245223 | -3.009780 | 1.055941  |
| C | -2.516312 | 3.493836  | 2.131548  | H | -8.619891 | -1.605691 | 2.646963  |
| H | -2.933819 | 4.122946  | 0.109040  | H | -7.557150 | -4.347693 | -0.488764 |
| H | -1.805060 | 2.780976  | 4.037983  | H | -9.296498 | -3.246821 | 0.904225  |
| H | -3.465119 | 3.852858  | 2.526050  | H | -3.799217 | 1.501142  | 0.183327  |
| C | 2.741812  | 2.114398  | 1.688708  | C | -2.949094 | -0.300879 | -2.421945 |
| C | 3.641585  | 3.183472  | 1.615892  | C | -2.389941 | -1.307754 | -3.215520 |
| C | 2.883468  | 1.173122  | 2.717920  | C | -2.189840 | 0.851882  | -2.182059 |
| C | 4.659847  | 3.306916  | 2.556761  | C | -1.102004 | -1.183603 | -3.736958 |
| H | 3.567631  | 3.906345  | 0.805079  | H | -2.975803 | -2.204027 | -3.423773 |
| C | 3.897690  | 1.302544  | 3.661858  | C | -0.894642 | 0.968917  | -2.674309 |
| H | 2.207467  | 0.315898  | 2.757329  | H | -2.618121 | 1.666227  | -1.595880 |
| C | 4.790985  | 2.368595  | 3.578624  | C | -0.341557 | -0.053027 | -3.449364 |
| H | 5.358838  | 4.138296  | 2.486853  | H | -0.694236 | -1.972763 | -4.367305 |
| H | 3.997140  | 0.562657  | 4.453837  | H | -0.313864 | 1.870627  | -2.479009 |
| H | 5.592276  | 2.466146  | 4.308193  | H | 0.668517  | 0.049661  | -3.847095 |
| C | 1.894879  | 2.847658  | -0.999395 | H | -5.000428 | 0.307322  | -2.126693 |
| C | 1.770942  | 4.245206  | -0.982431 | H | -4.743840 | -1.433137 | -2.157759 |
| C | 2.385813  | 2.219815  | -2.149769 | C | -5.934511 | 1.361378  | -0.012031 |
| C | 2.139529  | 4.994200  | -2.094917 | C | -6.090988 | 2.748535  | -0.003900 |
| H | 1.375526  | 4.745073  | -0.097744 | C | -7.040860 | 0.557443  | -0.303107 |
| C | 2.757149  | 2.972356  | -3.260014 | C | -7.330130 | 3.327349  | -0.262208 |
| H | 2.466367  | 1.132256  | -2.173478 | H | -5.228273 | 3.381025  | 0.214031  |
| C | 2.634276  | 4.358947  | -3.233340 | C | -8.279568 | 1.134324  | -0.564278 |
| H | 2.037869  | 6.077250  | -2.074252 | H | -6.919424 | -0.525444 | -0.321211 |
| H | 3.139408  | 2.471677  | -4.148047 | C | -8.429235 | 2.519408  | -0.542377 |
| H | 2.918051  | 4.948049  | -4.102885 | H | -7.436577 | 4.410582  | -0.251439 |
| H | -2.004679 | 0.201465  | 0.359977  | H | -9.133353 | 0.495394  | -0.784915 |
| C | -3.462315 | -1.429746 | 0.319746  | H | -9.398965 | 2.968983  | -0.746996 |
| H | -3.332978 | -2.262355 | -0.389175 |   |           |           |           |

|                                        |           |           |           |   |           |           |           |
|----------------------------------------|-----------|-----------|-----------|---|-----------|-----------|-----------|
| <b>IM5'</b>                            |           |           |           | H | -6.221717 | -0.726740 | -3.502701 |
| SCF energy in MeCN: -3224.918477 a.u.  |           |           |           | H | -7.002972 | -2.572643 | -2.030772 |
| Free energy in MeCN: -3224.006131 a.u. |           |           |           | P | -1.111410 | -1.710704 | 0.386707  |
|                                        |           |           |           | C | 0.400169  | -2.567862 | 0.986696  |
| C                                      | 0.111955  | 2.456685  | 0.147553  | C | 1.229539  | -3.335914 | 0.158187  |
| H                                      | 0.171994  | 2.858879  | 1.163558  | C | 0.830338  | -2.310950 | 2.297176  |
| H                                      | -0.292267 | 3.148128  | -0.592637 | C | 2.432558  | -3.852398 | 0.635246  |
| C                                      | 0.935356  | 1.385838  | -0.229475 | H | 0.932111  | -3.541987 | -0.869405 |
| H                                      | 1.055687  | 1.221514  | -1.302677 | C | 2.036474  | -2.815763 | 2.768872  |
| C                                      | 2.047505  | 0.818823  | 0.600656  | H | 0.209880  | -1.700074 | 2.954462  |
| H                                      | 1.832802  | 0.975556  | 1.670420  | C | 2.842453  | -3.595579 | 1.940946  |
| P                                      | -3.320618 | 1.311585  | -0.003710 | H | 3.053536  | -4.458646 | -0.024426 |
| C                                      | -3.493513 | 2.734930  | -1.151837 | H | 2.346744  | -2.602898 | 3.790784  |
| C                                      | -2.602678 | 2.824994  | -2.229737 | H | 3.788691  | -3.990605 | 2.307684  |
| C                                      | -4.494102 | 3.702947  | -1.017270 | C | -2.297244 | -2.055065 | 1.758364  |
| C                                      | -2.719525 | 3.854429  | -3.159862 | C | -3.088694 | -3.205931 | 1.832834  |
| H                                      | -1.807950 | 2.078772  | -2.326388 | C | -2.472425 | -1.059559 | 2.731151  |
| C                                      | -4.600826 | 4.740479  | -1.939013 | C | -4.037761 | -3.351169 | 2.841389  |
| H                                      | -5.190421 | 3.644931  | -0.180186 | H | -2.991827 | -3.985076 | 1.078910  |
| C                                      | -3.716849 | 4.816148  | -3.013118 | C | -3.415862 | -1.205975 | 3.744264  |
| H                                      | -2.022487 | 3.912290  | -3.994681 | H | -1.886139 | -0.139817 | 2.657884  |
| H                                      | -5.378777 | 5.492885  | -1.818889 | C | -4.207317 | -2.351836 | 3.796949  |
| H                                      | -3.802473 | 5.628009  | -3.733615 | H | -4.655866 | -4.247511 | 2.873501  |
| C                                      | -4.028155 | 1.939557  | 1.566062  | H | -3.547572 | -0.411122 | 4.477154  |
| C                                      | -3.130627 | 2.493967  | 2.489422  | H | -4.958762 | -2.462697 | 4.576959  |
| C                                      | -5.387728 | 1.886719  | 1.896459  | C | -1.717576 | -2.776034 | -0.975137 |
| C                                      | -3.580652 | 2.989742  | 3.708929  | C | -1.621568 | -4.175095 | -0.992073 |
| H                                      | -2.068548 | 2.520344  | 2.234429  | C | -2.329602 | -2.132784 | -2.057777 |
| C                                      | -5.835994 | 2.372862  | 3.122314  | C | -2.133096 | -4.907150 | -2.059234 |
| H                                      | -6.099434 | 1.455573  | 1.192851  | H | -1.131386 | -4.692736 | -0.167077 |
| C                                      | -4.935376 | 2.924944  | 4.030287  | C | -2.849473 | -2.864575 | -3.121567 |
| H                                      | -2.871020 | 3.418889  | 4.414539  | H | -2.381869 | -1.041860 | -2.057014 |
| H                                      | -6.895771 | 2.322437  | 3.367899  | C | -2.751927 | -4.253264 | -3.123411 |
| H                                      | -5.288916 | 3.302683  | 4.988307  | H | -2.049055 | -5.992826 | -2.060151 |
| Pd                                     | -1.067761 | 0.615653  | 0.079378  | H | -3.330324 | -2.346251 | -3.949848 |
| C                                      | -4.616031 | 0.174740  | -0.632670 | H | -3.151962 | -4.828440 | -3.956966 |
| C                                      | -5.071163 | -0.867575 | 0.189986  | H | 2.100376  | -0.270442 | 0.464469  |
| C                                      | -5.043847 | 0.209002  | -1.966546 | C | 3.436251  | 1.438609  | 0.248473  |
| C                                      | -5.926172 | -1.843673 | -0.308889 | H | 3.275018  | 2.193997  | -0.536868 |
| H                                      | -4.758532 | -0.904589 | 1.233963  | C | 4.011922  | 2.172466  | 1.470701  |
| C                                      | -5.897646 | -0.772220 | -2.463606 | H | 3.288884  | 2.956412  | 1.747109  |
| H                                      | -4.707596 | 1.010772  | -2.623917 | H | 4.041745  | 1.486667  | 2.331349  |
| C                                      | -6.338261 | -1.804117 | -1.639707 | N | 4.425941  | 0.518752  | -0.311416 |
| H                                      | -6.268276 | -2.641787 | 0.349113  | C | 4.640418  | -0.708817 | 0.425345  |

|                                       |           |           |           |   |           |           |           |
|---------------------------------------|-----------|-----------|-----------|---|-----------|-----------|-----------|
| H                                     | 4.568029  | -0.454662 | 1.496654  | P | 0.352769  | -1.965602 | -0.434057 |
| C                                     | 4.455674  | 0.420321  | -1.766930 | P | 2.383013  | 0.964064  | -0.035499 |
| C                                     | 5.378906  | 2.751981  | 1.245766  | C | 0.781343  | -2.413933 | 1.278207  |
| C                                     | 6.454909  | 2.383127  | 2.056347  | C | 1.181447  | -3.702827 | 1.662713  |
| C                                     | 5.619525  | 3.651257  | 0.200465  | C | 0.629622  | -1.433038 | 2.264526  |
| C                                     | 7.733296  | 2.890795  | 1.834204  | C | 1.476897  | -3.976912 | 2.993338  |
| H                                     | 6.288099  | 1.671511  | 2.866782  | H | 1.234988  | -4.501077 | 0.922992  |
| C                                     | 6.893918  | 4.156666  | -0.030932 | C | 0.912690  | -1.709701 | 3.599629  |
| H                                     | 4.793716  | 3.956091  | -0.444553 | H | 0.293881  | -0.433865 | 1.977713  |
| C                                     | 7.958306  | 3.777281  | 0.785668  | C | 1.351192  | -2.979520 | 3.961821  |
| H                                     | 8.556916  | 2.583834  | 2.477431  | H | 1.792700  | -4.977965 | 3.280628  |
| H                                     | 7.058413  | 4.853286  | -0.851989 | H | 0.785708  | -0.928831 | 4.348095  |
| H                                     | 8.956262  | 4.173356  | 0.605150  | H | 1.578194  | -3.202533 | 5.002484  |
| H                                     | 3.856479  | -1.476891 | 0.271321  | C | 1.762005  | -2.302270 | -1.554573 |
| C                                     | 3.142423  | 0.147353  | -2.464069 | C | 2.769753  | -3.241352 | -1.317404 |
| C                                     | 2.603456  | 1.097625  | -3.336472 | C | 1.771094  | -1.588776 | -2.762589 |
| C                                     | 2.406113  | -1.019684 | -2.221279 | C | 3.755211  | -3.468302 | -2.274330 |
| C                                     | 1.355088  | 0.910945  | -3.928823 | H | 2.808640  | -3.782209 | -0.373814 |
| H                                     | 3.168830  | 2.009807  | -3.535539 | C | 2.754520  | -1.821060 | -3.719858 |
| C                                     | 1.151357  | -1.202282 | -2.793541 | H | 0.992199  | -0.842719 | -2.949133 |
| H                                     | 2.810890  | -1.787430 | -1.560345 | C | 3.749170  | -2.765054 | -3.476267 |
| C                                     | 0.617054  | -0.234605 | -3.644797 | H | 4.540517  | -4.194328 | -2.071446 |
| H                                     | 0.953644  | 1.668801  | -4.600947 | H | 2.743077  | -1.263444 | -4.655282 |
| H                                     | 0.580138  | -2.107194 | -2.582758 | H | 4.521346  | -2.948931 | -4.220571 |
| H                                     | -0.368017 | -0.381486 | -4.086830 | C | -0.810330 | -3.311133 | -0.893090 |
| H                                     | 5.193172  | -0.354829 | -2.017761 | C | -1.667669 | -3.875355 | 0.064223  |
| H                                     | 4.863286  | 1.367184  | -2.159283 | C | -0.956960 | -3.688114 | -2.234589 |
| C                                     | 5.992034  | -1.321385 | 0.157348  | C | -2.646915 | -4.789257 | -0.315833 |
| C                                     | 6.135313  | -2.707083 | 0.066220  | H | -1.561780 | -3.610175 | 1.116839  |
| C                                     | 7.128215  | -0.516586 | 0.018016  | C | -1.937615 | -4.599788 | -2.610000 |
| C                                     | 7.387154  | -3.284248 | -0.134615 | H | -0.298119 | -3.265681 | -2.992974 |
| H                                     | 5.247261  | -3.336270 | 0.148974  | C | -2.789567 | -5.148625 | -1.653805 |
| C                                     | 8.378812  | -1.090453 | -0.183621 | H | -3.297220 | -5.226129 | 0.440191  |
| H                                     | 7.010473  | 0.566128  | 0.058680  | H | -2.034219 | -4.885471 | -3.655547 |
| C                                     | 8.514169  | -2.476290 | -0.256320 | H | -3.556784 | -5.860825 | -1.950124 |
| H                                     | 7.480807  | -4.367015 | -0.205723 | C | 3.745804  | -0.252065 | 0.186361  |
| H                                     | 9.254393  | -0.450328 | -0.286207 | C | 4.729436  | -0.445172 | -0.791322 |
| H                                     | 9.493655  | -2.924236 | -0.416446 | C | 3.795995  | -1.036562 | 1.348635  |
|                                       |           |           |           | C | 5.735750  | -1.388637 | -0.606297 |
| <b>IM6'</b>                           |           |           |           | H | 4.729372  | 0.152771  | -1.699363 |
| SCF energy in MeCN: -3224.735181 a.u. |           |           |           | C | 4.797203  | -1.985283 | 1.525356  |
| Free energy in MeCN: -3223.82131 a.u. |           |           |           | H | 3.064357  | -0.889000 | 2.138795  |
|                                       |           |           |           | C | 5.772127  | -2.165983 | 0.547422  |
| Pd                                    | -0.009537 | 0.457602  | -0.676291 | H | 6.496140  | -1.514010 | -1.375299 |

|   |           |           |           |                                        |           |           |           |
|---|-----------|-----------|-----------|----------------------------------------|-----------|-----------|-----------|
| H | 4.819079  | -2.574333 | 2.440789  | C                                      | -4.211736 | -0.527856 | -1.866638 |
| H | 6.561421  | -2.901916 | 0.688459  | C                                      | -5.102299 | -1.427642 | -1.271871 |
| C | 2.291150  | 1.787854  | 1.595190  | C                                      | -4.734916 | 0.546732  | -2.595848 |
| C | 1.069504  | 2.326950  | 2.017731  | C                                      | -6.478911 | -1.252949 | -1.392510 |
| C | 3.411551  | 1.915750  | 2.427620  | H                                      | -4.704552 | -2.286519 | -0.727807 |
| C | 0.966358  | 2.967252  | 3.250046  | C                                      | -6.109125 | 0.724857  | -2.717816 |
| H | 0.191757  | 2.239178  | 1.370320  | H                                      | -4.048861 | 1.242709  | -3.082258 |
| C | 3.303630  | 2.547630  | 3.662631  | C                                      | -6.985698 | -0.171854 | -2.108585 |
| H | 4.371411  | 1.512792  | 2.107375  | H                                      | -7.158283 | -1.967315 | -0.931283 |
| C | 2.080556  | 3.070515  | 4.078666  | H                                      | -6.498574 | 1.560901  | -3.296283 |
| H | 0.010322  | 3.384849  | 3.566539  | H                                      | -8.060682 | -0.034060 | -2.202748 |
| H | 4.179949  | 2.633534  | 4.301836  | C                                      | -2.601985 | -0.535195 | 2.783270  |
| H | 1.998464  | 3.563099  | 5.045610  | C                                      | -3.177005 | -1.477298 | 3.638546  |
| C | 3.140029  | 2.216962  | -1.136322 | C                                      | -1.832049 | 0.491750  | 3.334683  |
| C | 3.571647  | 3.465362  | -0.674588 | C                                      | -2.981775 | -1.399682 | 5.014344  |
| C | 3.250277  | 1.926584  | -2.504293 | H                                      | -3.786524 | -2.279687 | 3.219955  |
| C | 4.109750  | 4.395460  | -1.561289 | C                                      | -1.646601 | 0.581249  | 4.710869  |
| H | 3.486920  | 3.717129  | 0.381364  | H                                      | -1.368867 | 1.219283  | 2.666883  |
| C | 3.799108  | 2.852719  | -3.384980 | C                                      | -2.220070 | -0.366642 | 5.555575  |
| H | 2.909108  | 0.958754  | -2.877117 | H                                      | -3.436696 | -2.141499 | 5.667548  |
| C | 4.227556  | 4.091923  | -2.914358 | H                                      | -1.046522 | 1.391158  | 5.124277  |
| H | 4.441328  | 5.362384  | -1.188209 | H                                      | -2.079734 | -0.296971 | 6.632250  |
| H | 3.885411  | 2.608530  | -4.442145 | C                                      | -3.193277 | 2.974912  | 0.480825  |
| H | 4.649186  | 4.820483  | -3.603401 | C                                      | -2.290989 | 3.700630  | 1.263892  |
| C | -2.211450 | 0.457068  | -0.793567 | C                                      | -3.663963 | 3.541508  | -0.706806 |
| C | -0.106454 | 2.529136  | -1.343814 | C                                      | -1.840277 | 4.951190  | 0.852256  |
| H | -1.016707 | 2.985278  | -0.948661 | H                                      | -1.946740 | 3.276925  | 2.208750  |
| C | -0.144129 | 2.142542  | -2.728890 | C                                      | -3.216687 | 4.793572  | -1.122338 |
| H | 0.806947  | 1.856838  | -3.187332 | H                                      | -4.385259 | 2.985400  | -1.308877 |
| C | -1.254447 | 2.120163  | -3.518164 | C                                      | -2.297050 | 5.495880  | -0.347218 |
| H | -2.215189 | 2.475619  | -3.142114 | H                                      | -1.134556 | 5.504773  | 1.469774  |
| H | -1.218023 | 1.802362  | -4.557212 | H                                      | -3.587556 | 5.221380  | -2.051786 |
| H | 0.796284  | 3.044686  | -1.010369 | H                                      | -1.944260 | 6.472789  | -0.671132 |
| H | -2.385782 | 1.420063  | -1.276473 |                                        |           |           |           |
| N | -2.645744 | 0.536201  | 0.530331  | <b>IM7'</b>                            |           |           |           |
| C | -3.619207 | 1.596723  | 0.888282  | SCF energy in MeCN: -3224.878774 a.u.  |           |           |           |
| H | -3.761892 | 1.541927  | 1.973233  | Free energy in MeCN: -3223.966569 a.u. |           |           |           |
| H | -4.580737 | 1.334127  | 0.411535  |                                        |           |           |           |
| C | -2.773365 | -0.692688 | 1.296146  | Pd                                     | 0.035644  | 0.474218  | -0.681536 |
| H | -3.746218 | -1.173499 | 1.081694  | P                                      | 0.570282  | -1.886853 | -0.518506 |
| H | -2.005407 | -1.378759 | 0.909750  | P                                      | 2.317668  | 1.141398  | -0.010737 |
| C | -2.723615 | -0.676926 | -1.672304 | C                                      | 1.009081  | -2.386038 | 1.185696  |
| H | -2.187321 | -0.623405 | -2.631632 | C                                      | 1.479398  | -3.658671 | 1.541836  |
| H | -2.510894 | -1.657133 | -1.238770 | C                                      | 0.784286  | -1.446417 | 2.197606  |

|   |           |           |           |   |           |           |           |
|---|-----------|-----------|-----------|---|-----------|-----------|-----------|
| C | 1.770894  | -3.954769 | 2.868945  | C | 0.646748  | 2.821786  | 3.343285  |
| H | 1.588945  | -4.429872 | 0.779557  | H | -0.021209 | 2.060863  | 1.433246  |
| C | 1.064647  | -1.743964 | 3.528810  | C | 3.019901  | 2.733489  | 3.746922  |
| H | 0.388030  | -0.464700 | 1.925445  | H | 4.219378  | 1.909299  | 2.162271  |
| C | 1.570997  | -2.995665 | 3.863326  | C | 1.735108  | 3.057228  | 4.178856  |
| H | 2.141927  | -4.943975 | 3.133010  | H | -0.361517 | 3.075701  | 3.672405  |
| H | 0.874935  | -0.994595 | 4.296514  | H | 3.876817  | 2.918977  | 4.392560  |
| H | 1.792942  | -3.235973 | 4.901798  | H | 1.584516  | 3.493416  | 5.165102  |
| C | 2.028332  | -2.136777 | -1.606735 | C | 3.007045  | 2.474297  | -1.067387 |
| C | 3.072115  | -3.035346 | -1.372793 | C | 3.517903  | 3.675868  | -0.568384 |
| C | 2.035631  | -1.385768 | -2.791883 | C | 2.990539  | 2.271133  | -2.453858 |
| C | 4.087034  | -3.194917 | -2.312512 | C | 4.012509  | 4.645972  | -1.437048 |
| H | 3.111831  | -3.600143 | -0.443483 | H | 3.519520  | 3.863122  | 0.504552  |
| C | 3.050133  | -1.547759 | -3.731268 | C | 3.496698  | 3.235010  | -3.319602 |
| H | 1.229173  | -0.665301 | -2.961842 | H | 2.566287  | 1.347093  | -2.852075 |
| C | 4.076771  | -2.458656 | -3.494213 | C | 4.007499  | 4.427241  | -2.811682 |
| H | 4.899970  | -3.891280 | -2.110593 | H | 4.399971  | 5.580610  | -1.034871 |
| H | 3.039165  | -0.957655 | -4.646894 | H | 3.476075  | 3.061510  | -4.394401 |
| H | 4.873220  | -2.587663 | -4.225474 | H | 4.391586  | 5.188779  | -3.488107 |
| C | -0.489675 | -3.299983 | -1.039990 | C | -2.105232 | 0.396276  | -0.782707 |
| C | -1.316828 | -3.956941 | -0.117121 | C | -0.322838 | 2.553501  | -1.193338 |
| C | -0.609837 | -3.628319 | -2.397078 | H | -1.184268 | 2.934931  | -0.631667 |
| C | -2.243786 | -4.904311 | -0.543078 | C | -0.545411 | 2.555051  | -2.638147 |
| H | -1.235912 | -3.727050 | 0.945454  | H | 0.327909  | 2.313218  | -3.256780 |
| C | -1.534857 | -4.576612 | -2.819583 | C | -1.709740 | 2.792594  | -3.273127 |
| H | 0.020983  | -3.128598 | -3.132443 | H | -2.600605 | 3.088948  | -2.716785 |
| C | -2.360618 | -5.213333 | -1.895606 | H | -1.803081 | 2.729305  | -4.355834 |
| H | -2.877988 | -5.401965 | 0.189683  | H | 0.571160  | 3.122782  | -0.908092 |
| H | -1.613299 | -4.816602 | -3.878603 | H | -2.404024 | 1.369143  | -1.183545 |
| H | -3.089586 | -5.949450 | -2.229547 | N | -2.606466 | 0.326145  | 0.577167  |
| C | 3.796605  | 0.070518  | 0.232214  | C | -3.821892 | 1.104080  | 0.862176  |
| C | 4.771093  | -0.072759 | -0.764460 | H | -4.084381 | 0.901305  | 1.911029  |
| C | 3.916130  | -0.710443 | 1.391928  | H | -4.677333 | 0.765601  | 0.247312  |
| C | 5.831602  | -0.958272 | -0.599895 | C | -2.619489 | -0.989166 | 1.174360  |
| H | 4.708398  | 0.518133  | -1.677237 | H | -3.480503 | -1.609106 | 0.844882  |
| C | 4.971315  | -1.602030 | 1.550021  | H | -1.725531 | -1.504187 | 0.790707  |
| H | 3.187393  | -0.608971 | 2.192606  | C | -2.591186 | -0.681905 | -1.756564 |
| C | 5.936318  | -1.730190 | 0.554127  | H | -2.035763 | -0.537263 | -2.696930 |
| H | 6.577760  | -1.049448 | -1.388427 | H | -2.336733 | -1.684443 | -1.393729 |
| H | 5.036469  | -2.194929 | 2.461687  | C | -4.074018 | -0.622533 | -2.019202 |
| H | 6.765185  | -2.425765 | 0.676910  | C | -4.930771 | -1.625018 | -1.554637 |
| C | 2.123423  | 1.917875  | 1.642920  | C | -4.635189 | 0.465534  | -2.698518 |
| C | 0.836461  | 2.257408  | 2.083842  | C | -6.308840 | -1.534645 | -1.737029 |
| C | 3.212763  | 2.170400  | 2.488865  | H | -4.502399 | -2.490561 | -1.044486 |







|   |           |           |           |   |           |           |           |
|---|-----------|-----------|-----------|---|-----------|-----------|-----------|
| C | 1.751941  | -1.609250 | -2.689198 | C | 1.727867  | 1.995598  | -3.189401 |
| C | 4.305492  | -2.678886 | -2.473335 | C | 1.220074  | 4.724367  | -3.004975 |
| H | 3.899003  | -2.880986 | -0.373300 | H | 1.479249  | 4.493918  | -0.884453 |
| C | 2.552768  | -1.723587 | -3.821393 | C | 1.486160  | 2.736618  | -4.340367 |
| H | 0.755408  | -1.163657 | -2.768241 | H | 1.897590  | 0.920860  | -3.262060 |
| C | 3.832478  | -2.264344 | -3.715046 | C | 1.225882  | 4.103137  | -4.250002 |
| H | 5.313293  | -3.079704 | -2.379253 | H | 1.011304  | 5.789347  | -2.927225 |
| H | 2.177805  | -1.383879 | -4.785749 | H | 1.487149  | 2.242412  | -5.310380 |
| H | 4.463448  | -2.350820 | -4.597325 | H | 1.021080  | 4.680230  | -5.149161 |
| C | -0.006578 | -3.400262 | -0.220758 | C | -2.842406 | 0.258750  | -0.461478 |
| C | -0.601279 | -3.954894 | 0.924542  | C | -1.565236 | 2.087849  | -0.803310 |
| C | -0.280990 | -3.977782 | -1.468118 | C | -1.789487 | 2.223252  | -2.231745 |
| C | -1.435000 | -5.063633 | 0.823697  | H | -0.932259 | 1.998805  | -2.875254 |
| H | -0.393757 | -3.522193 | 1.904347  | C | -2.964741 | 2.522404  | -2.817503 |
| C | -1.108480 | -5.093571 | -1.562985 | H | -3.841203 | 2.788363  | -2.223712 |
| H | 0.173209  | -3.571674 | -2.370665 | H | -3.072792 | 2.573743  | -3.898194 |
| C | -1.685878 | -5.641542 | -0.420269 | H | -2.293301 | 2.587553  | -0.160048 |
| H | -1.877115 | -5.487739 | 1.724095  | H | -3.541929 | 0.989347  | -0.866663 |
| H | -1.297977 | -5.538022 | -2.537879 | N | -3.161985 | -0.101100 | 0.803812  |
| H | -2.328595 | -6.516249 | -0.497204 | C | -4.271951 | 0.561044  | 1.525193  |
| C | 3.634350  | 0.892226  | -0.496856 | H | -4.132175 | 0.326038  | 2.587338  |
| C | 4.422392  | 0.836181  | -1.651699 | H | -5.208398 | 0.078574  | 1.200509  |
| C | 4.139936  | 0.355435  | 0.697019  | C | -2.603129 | -1.260298 | 1.476598  |
| C | 5.686071  | 0.252815  | -1.606383 | H | -3.415166 | -1.968812 | 1.711011  |
| H | 4.062319  | 1.262745  | -2.585784 | H | -1.947899 | -1.786402 | 0.772539  |
| C | 5.395011  | -0.237640 | 0.734832  | C | -2.493289 | -0.782939 | -1.501895 |
| H | 3.551613  | 0.422704  | 1.609812  | H | -2.135697 | -0.249381 | -2.391404 |
| C | 6.172826  | -0.291518 | -0.420981 | H | -1.701568 | -1.476108 | -1.188560 |
| H | 6.293458  | 0.225208  | -2.509351 | C | -3.753348 | -1.559888 | -1.800494 |
| H | 5.766593  | -0.649934 | 1.671754  | C | -3.939110 | -2.839294 | -1.272463 |
| H | 7.160443  | -0.748301 | -0.394978 | C | -4.778948 | -0.973946 | -2.548518 |
| C | 2.074705  | 2.808494  | 0.928694  | C | -5.122653 | -3.533504 | -1.506549 |
| C | 0.958624  | 3.089715  | 1.725797  | H | -3.139535 | -3.298799 | -0.688715 |
| C | 3.261211  | 3.524307  | 1.143645  | C | -5.962210 | -1.667186 | -2.782703 |
| C | 1.021470  | 4.073882  | 2.709283  | H | -4.634567 | 0.030940  | -2.953132 |
| H | 0.032694  | 2.534094  | 1.573403  | C | -6.136912 | -2.948035 | -2.260606 |
| C | 3.323696  | 4.500419  | 2.131970  | H | -5.250753 | -4.536105 | -1.100763 |
| H | 4.136614  | 3.314788  | 0.529916  | H | -6.750790 | -1.208652 | -3.376433 |
| C | 2.203678  | 4.779680  | 2.914026  | H | -7.062714 | -3.489515 | -2.444738 |
| H | 0.142002  | 4.288007  | 3.315550  | C | -1.836437 | -0.902454 | 2.724540  |
| H | 4.250012  | 5.049127  | 2.289795  | C | -1.682764 | -1.830711 | 3.756585  |
| H | 2.255443  | 5.547180  | 3.683545  | C | -1.256916 | 0.361569  | 2.860115  |
| C | 1.749842  | 2.618832  | -1.930695 | C | -0.955804 | -1.504645 | 4.898470  |
| C | 1.483887  | 3.991612  | -1.850562 | H | -2.149330 | -2.813372 | 3.669284  |

|   |           |           |           |   |           |           |           |
|---|-----------|-----------|-----------|---|-----------|-----------|-----------|
| C | -0.540767 | 0.696226  | 4.007286  | H | 4.008706  | -3.126133 | -3.700633 |
| H | -1.398362 | 1.088868  | 2.057672  | H | 0.203482  | -1.890522 | -5.280416 |
| C | -0.387692 | -0.238553 | 5.028337  | H | 2.571431  | -2.572655 | -5.652048 |
| H | -0.844682 | -2.236497 | 5.696041  | C | -0.837882 | -3.475055 | -0.178796 |
| H | -0.099334 | 1.688230  | 4.101480  | C | -1.232356 | -3.805484 | 1.129991  |
| H | 0.165488  | 0.021203  | 5.928976  | C | -1.505376 | -4.096092 | -1.242402 |
| C | -4.350279 | 2.046507  | 1.331837  | C | -2.246215 | -4.727847 | 1.364658  |
| C | -3.625971 | 2.911022  | 2.159971  | H | -0.716046 | -3.343512 | 1.974622  |
| C | -5.124248 | 2.588405  | 0.302133  | C | -2.521542 | -5.019665 | -1.006420 |
| C | -3.651779 | 4.284689  | 1.942350  | H | -1.219619 | -3.870349 | -2.268787 |
| H | -3.041086 | 2.499135  | 2.983788  | C | -2.897567 | -5.341340 | 0.295041  |
| C | -5.149278 | 3.963092  | 0.080663  | H | -2.523615 | -4.973620 | 2.389381  |
| H | -5.710030 | 1.922164  | -0.334674 | H | -3.018811 | -5.495879 | -1.850199 |
| C | -4.405911 | 4.812476  | 0.895479  | H | -3.692133 | -6.063444 | 0.474752  |
| H | -3.087809 | 4.948146  | 2.595677  | C | 3.623445  | 0.450013  | 0.358409  |
| H | -5.753807 | 4.371114  | -0.727151 | C | 4.276334  | -0.394137 | -0.550309 |
| H | -4.425299 | 5.886743  | 0.724497  | C | 4.042179  | 0.432960  | 1.696782  |
| H | -0.571060 | 2.445997  | -0.509391 | C | 5.316567  | -1.220000 | -0.137530 |

### TS2c'

SCF energy in MeCN: -3224.830545 a.u.

Free energy in MeCN: -3223.920101 a.u.

|    |           |           |           |   |          |           |           |
|----|-----------|-----------|-----------|---|----------|-----------|-----------|
| Pd | 0.090222  | 0.179599  | -0.329450 | H | 3.964684 | -0.407782 | -1.594844 |
| P  | 0.416743  | -2.122787 | -0.363937 | C | 5.101448 | -0.373058 | 2.101513  |
| P  | 2.126875  | 1.366187  | -0.180642 | H | 3.527598 | 1.051838  | 2.432756  |
| C  | 1.643146  | -2.801363 | 0.822685  | C | 5.741874 | -1.206454 | 1.188604  |
| C  | 2.177946  | -4.092070 | 0.690607  | H | 5.802952 | -1.872458 | -0.862893 |
| C  | 1.941203  | -2.060463 | 1.967467  | H | 5.414823 | -0.363196 | 3.144954  |
| C  | 3.021936  | -4.609762 | 1.664806  | H | 6.560903 | -1.847463 | 1.510466  |
| H  | 1.917332  | -4.695884 | -0.179494 | C | 2.237084 | 2.939628  | 0.767796  |
| C  | 2.761227  | -2.594165 | 2.961142  | C | 1.043383 | 3.646893  | 0.960377  |
| H  | 1.516503  | -1.058981 | 2.075408  | C | 3.420401 | 3.474090  | 1.296126  |
| C  | 3.310653  | -3.861759 | 2.806996  | C | 1.026078 | 4.837806  | 1.680585  |
| H  | 3.440619  | -5.608116 | 1.545487  | H | 0.118900 | 3.242589  | 0.539034  |
| H  | 2.976704  | -2.003739 | 3.851247  | C | 3.403041 | 4.662184  | 2.021975  |
| H  | 3.961288  | -4.273793 | 3.577413  | H | 4.363879 | 2.950989  | 1.142696  |
| C  | 1.120419  | -2.420874 | -2.031641 | C | 2.204928 | 5.343469  | 2.223314  |
| C  | 2.449709  | -2.796609 | -2.256391 | H | 0.086583 | 5.369478  | 1.830887  |
| C  | 0.328689  | -2.082316 | -3.143409 | H | 4.331682 | 5.058828  | 2.429773  |
| C  | 2.966940  | -2.844119 | -3.550048 | H | 2.190730 | 6.267165  | 2.799405  |
| H  | 3.095171  | -3.030949 | -1.412221 | C | 2.616463 | 1.904529  | -1.875611 |
| C  | 0.837840  | -2.153623 | -4.434897 | C | 3.368466 | 3.056290  | -2.135669 |
| H  | -0.691069 | -1.726050 | -2.981452 | C | 2.205996 | 1.113466  | -2.958858 |
| C  | 2.164340  | -2.532881 | -4.642979 | C | 3.705008 | 3.401971  | -3.441551 |
|    |           |           |           | H | 3.689649 | 3.694617  | -1.313094 |
|    |           |           |           | C | 2.554247 | 1.452862  | -4.262833 |
|    |           |           |           | H | 1.598676 | 0.225543  | -2.769537 |
|    |           |           |           | C | 3.303002 | 2.600605  | -4.507872 |

|   |           |           |           |   |           |           |           |
|---|-----------|-----------|-----------|---|-----------|-----------|-----------|
| H | 4.285719  | 4.304544  | -3.627058 | C | -2.500597 | 3.933474  | 1.223818  |
| H | 2.228629  | 0.820076  | -5.087529 | C | -4.577995 | 3.269502  | 0.208422  |
| H | 3.567393  | 2.875279  | -5.527790 | C | -2.555819 | 5.146779  | 0.544414  |
| C | -2.565732 | 0.591077  | -0.345973 | H | -1.670137 | 3.716676  | 1.898716  |
| C | -1.199677 | 1.882219  | -1.704801 | C | -4.639960 | 4.485176  | -0.467589 |
| C | -1.957027 | 1.623461  | -2.904916 | H | -5.363317 | 2.523960  | 0.071927  |
| H | -1.494143 | 0.930983  | -3.618860 | C | -3.623047 | 5.422468  | -0.307932 |
| C | -3.187588 | 2.100589  | -3.191979 | H | -1.763702 | 5.882909  | 0.675468  |
| H | -3.679832 | 2.817866  | -2.532430 | H | -5.480311 | 4.697311  | -1.126660 |
| H | -3.710559 | 1.837891  | -4.109199 | H | -3.663072 | 6.369454  | -0.842974 |
| H | -0.121105 | 1.890604  | -1.888762 | H | -1.509129 | 2.763314  | -1.133337 |
| N | -2.565072 | 0.659732  | 1.037807  | H | -3.157452 | 1.411030  | -0.748611 |
| C | -3.410521 | 1.643473  | 1.732843  |   |           |           |           |
| H | -2.987723 | 1.763849  | 2.740861  |   |           |           |           |
| H | -4.422424 | 1.211570  | 1.854751  |   |           |           |           |
| C | -2.232545 | -0.481405 | 1.863202  |   |           |           |           |
| H | -3.145346 | -0.849995 | 2.367765  |   |           |           |           |
| H | -1.905446 | -1.297148 | 1.207617  |   |           |           |           |
| C | -2.962616 | -0.698988 | -1.036082 | C | 1.833268  | 0.137918  | 0.946011  |
| H | -2.808756 | -0.549694 | -2.112373 | H | 1.706717  | 0.398967  | -0.112229 |
| H | -2.345696 | -1.547527 | -0.734250 | H | 1.914460  | -0.953540 | 1.012450  |
| C | -4.409252 | -0.999128 | -0.731818 | C | 0.751757  | 0.700877  | 1.796371  |
| C | -4.744339 | -2.076689 | 0.092998  | H | 0.716025  | 0.325396  | 2.822643  |
| C | -5.433526 | -0.177086 | -1.214116 | C | 0.192018  | 1.967470  | 1.518824  |
| C | -6.072600 | -2.332694 | 0.424729  | H | 0.570035  | 2.558771  | 0.680473  |
| H | -3.949280 | -2.726303 | 0.465379  | P | -1.501593 | -1.848746 | 0.480061  |
| C | -6.761281 | -0.429958 | -0.882638 | C | -1.850866 | -2.749869 | 2.037918  |
| H | -5.171098 | 0.664529  | -1.860718 | C | -1.592274 | -2.102046 | 3.251439  |
| C | -7.084694 | -1.507433 | -0.058261 | C | -2.364289 | -4.053777 | 2.062467  |
| H | -6.316956 | -3.182656 | 1.060994  | C | -1.833626 | -2.743714 | 4.464096  |
| H | -7.549419 | 0.213596  | -1.272345 | H | -1.206940 | -1.080371 | 3.227825  |
| H | -8.123443 | -1.704262 | 0.202194  | C | -2.607901 | -4.693016 | 3.273651  |
| C | -1.155933 | -0.216707 | 2.887577  | H | -2.578112 | -4.565775 | 1.123890  |
| C | -0.952664 | -1.139823 | 3.915764  | C | -2.343248 | -4.038631 | 4.476171  |
| C | -0.316937 | 0.897763  | 2.809118  | H | -1.629281 | -2.227290 | 5.400541  |
| C | 0.080519  | -0.968684 | 4.832408  | H | -3.006165 | -5.706472 | 3.280033  |
| H | -1.610600 | -2.008155 | 3.991331  | H | -2.537816 | -4.539789 | 5.423068  |
| C | 0.711243  | 1.081021  | 3.732727  | C | 0.014371  | -2.638853 | -0.179166 |
| H | -0.470203 | 1.615066  | 2.001680  | C | 0.630162  | -2.035221 | -1.286747 |
| C | 0.916829  | 0.143141  | 4.742873  | C | 0.635775  | -3.739203 | 0.419539  |
| H | 0.233870  | -1.705673 | 5.619293  | C | 1.830027  | -2.526200 | -1.788262 |
| H | 1.350505  | 1.961727  | 3.654879  | H | 0.168507  | -1.153422 | -1.738838 |
| H | 1.721354  | 0.281837  | 5.464103  | C | 1.843433  | -4.224033 | -0.078991 |
| C | -3.503677 | 2.975846  | 1.052222  | H | 0.183119  | -4.213251 | 1.289354  |
|   |           |           |           | C | 2.441947  | -3.621421 | -1.181151 |

**IM1''**

SCF energy in MeCN: -3179.321517 a.u.

Free energy in MeCN: -3178.515335 a.u.

|    |           |           |           |                                       |           |           |           |
|----|-----------|-----------|-----------|---------------------------------------|-----------|-----------|-----------|
| H  | 2.308368  | -2.031085 | -2.631419 | C                                     | -6.960611 | 1.721180  | 0.693944  |
| H  | 2.322158  | -5.073884 | 0.405002  | H                                     | -5.690871 | 2.568060  | -0.824912 |
| H  | 3.390994  | -3.994859 | -1.560487 | C                                     | -5.884713 | 0.264742  | 2.288020  |
| Pd | -1.151257 | 0.469014  | 0.787419  | H                                     | -3.760042 | -0.031295 | 2.000044  |
| O  | 3.125837  | 0.687908  | 1.375026  | C                                     | -7.032131 | 0.895376  | 1.815251  |
| C  | 4.102207  | 0.610695  | 0.472527  | H                                     | -7.854491 | 2.225543  | 0.330054  |
| O  | 4.012874  | 0.108769  | -0.631166 | H                                     | -5.931174 | -0.369260 | 3.172060  |
| C  | -2.826007 | -2.501394 | -0.615823 | H                                     | -7.983335 | 0.753221  | 2.325870  |
| C  | -2.581847 | -2.978943 | -1.907433 | H                                     | -0.251490 | 2.556585  | 2.322082  |
| C  | -4.152935 | -2.445766 | -0.162952 | C                                     | 5.365013  | 1.314172  | 0.982496  |
| C  | -3.634665 | -3.400965 | -2.716487 | H                                     | 5.556362  | 0.962700  | 2.002738  |
| H  | -1.561149 | -3.030649 | -2.284972 | N                                     | 6.508212  | 0.950033  | 0.163207  |
| C  | -5.201927 | -2.868335 | -0.970762 | H                                     | 6.564189  | 1.436296  | -0.723940 |
| H  | -4.365523 | -2.081773 | 0.841908  | C                                     | 6.762054  | -0.401934 | 0.072248  |
| C  | -4.945642 | -3.351597 | -2.252380 | O                                     | 6.416008  | -1.207691 | 0.917191  |
| H  | -3.423741 | -3.771330 | -3.719051 | O                                     | 7.462065  | -0.655544 | -1.052216 |
| H  | -6.223228 | -2.819013 | -0.594489 | C                                     | 7.658081  | -2.051537 | -1.461969 |
| H  | -5.765522 | -3.683229 | -2.887882 | C                                     | 8.543726  | -2.777289 | -0.461922 |
| P  | -2.954407 | 1.468832  | -0.309871 | H                                     | 9.486912  | -2.236046 | -0.322460 |
| C  | -2.939814 | 3.281426  | -0.613843 | H                                     | 8.047320  | -2.874789 | 0.505712  |
| C  | -2.620352 | 4.107925  | 0.471922  | H                                     | 8.782607  | -3.779149 | -0.840102 |
| C  | -3.229688 | 3.871559  | -1.848938 | C                                     | 6.303095  | -2.723763 | -1.634627 |
| C  | -2.605555 | 5.490332  | 0.331640  | H                                     | 5.795281  | -2.848758 | -0.675070 |
| H  | -2.376461 | 3.651423  | 1.432627  | H                                     | 5.658322  | -2.121231 | -2.286153 |
| C  | -3.201882 | 5.257727  | -1.991301 | H                                     | 6.436438  | -3.710348 | -2.096044 |
| H  | -3.478483 | 3.245359  | -2.705622 | C                                     | 8.362369  | -1.905752 | -2.800432 |
| C  | -2.893213 | 6.069153  | -0.903609 | H                                     | 8.571013  | -2.893450 | -3.227144 |
| H  | -2.357307 | 6.118226  | 1.185723  | H                                     | 7.740643  | -1.347759 | -3.509351 |
| H  | -3.425293 | 5.704309  | -2.959217 | H                                     | 9.312835  | -1.372934 | -2.684502 |
| H  | -2.871432 | 7.151613  | -1.018060 | C                                     | 5.180818  | 2.813361  | 0.981713  |
| C  | -3.152476 | 0.789683  | -1.998474 | C                                     | 5.718305  | 3.596181  | 2.003907  |
| C  | -4.350650 | 0.306871  | -2.531007 | C                                     | 4.500002  | 3.439249  | -0.066635 |
| C  | -1.989513 | 0.720517  | -2.782483 | C                                     | 5.575139  | 4.980075  | 1.983029  |
| C  | -4.386884 | -0.223573 | -3.818942 | H                                     | 6.252211  | 3.111736  | 2.820967  |
| H  | -5.259409 | 0.322024  | -1.931252 | C                                     | 4.355423  | 4.823044  | -0.088795 |
| C  | -2.030195 | 0.203802  | -4.072143 | H                                     | 4.071954  | 2.831826  | -0.866091 |
| H  | -1.045189 | 1.078953  | -2.365368 | C                                     | 4.892944  | 5.596510  | 0.936687  |
| C  | -3.232789 | -0.270054 | -4.594649 | H                                     | 5.995726  | 5.579454  | 2.788825  |
| H  | -5.325485 | -0.611191 | -4.212681 | H                                     | 3.817872  | 5.298179  | -0.907563 |
| H  | -1.119589 | 0.163840  | -4.668228 | H                                     | 4.777741  | 6.678923  | 0.922521  |
| H  | -3.266132 | -0.685557 | -5.600671 |                                       |           |           |           |
| C  | -4.588516 | 1.262126  | 0.495968  | <b>1a''</b>                           |           |           |           |
| C  | -5.745928 | 1.909040  | 0.042754  | SCF energy in MeCN: -978.270089 a.u.  |           |           |           |
| C  | -4.669809 | 0.451271  | 1.633022  | Free energy in MeCN: -977.970262 a.u. |           |           |           |

|   |           |           |           | <b>2a''</b>                           |           |           |           |
|---|-----------|-----------|-----------|---------------------------------------|-----------|-----------|-----------|
| C | 1.273351  | 0.577113  | 0.913231  | SCF energy in MeCN: -789.651315 a.u.  |           |           |           |
| C | 0.645318  | 1.663421  | 0.032147  | Free energy in MeCN: -789.361704 a.u. |           |           |           |
| O | 1.206511  | 2.244956  | -0.864481 |                                       |           |           |           |
| O | -0.607932 | 1.935353  | 0.454201  | C                                     | 0.077256  | 3.069180  | -0.465689 |
| C | -1.325618 | 2.855640  | -0.393243 | H                                     | -0.959678 | 2.828137  | -0.226000 |
| H | -0.700100 | 3.746535  | -0.539652 | H                                     | 0.423135  | 4.058544  | -0.173282 |
| H | -1.465092 | 2.386279  | -1.376154 | C                                     | 0.871541  | 2.197026  | -1.089380 |
| C | -2.616018 | 3.178499  | 0.265579  | H                                     | 1.905834  | 2.477488  | -1.300817 |
| H | -2.547361 | 3.557068  | 1.287316  | C                                     | 0.454785  | 0.812587  | -1.467038 |
| C | -3.801829 | 3.066052  | -0.329334 | H                                     | -0.622729 | 0.785194  | -1.676794 |
| H | -3.894347 | 2.684037  | -1.345980 | H                                     | 0.970513  | 0.483627  | -2.379852 |
| H | -4.724629 | 3.355807  | 0.167859  | C                                     | 0.721342  | -0.243031 | -0.359991 |
| N | 0.318404  | -0.488280 | 1.196702  | C                                     | 2.193552  | -0.427741 | -0.082464 |
| H | 1.464862  | 1.061163  | 1.882367  | C                                     | 2.928557  | 0.502803  | 0.660121  |
| H | 0.059024  | -0.659032 | 2.156802  | C                                     | 2.862347  | -1.534285 | -0.610026 |
| C | -0.582042 | -0.877137 | 0.245152  | C                                     | 4.292583  | 0.326134  | 0.872027  |
| O | -0.499268 | -0.566162 | -0.933426 | H                                     | 2.436044  | 1.385824  | 1.069190  |
| O | -1.534638 | -1.640270 | 0.813341  | C                                     | 4.227052  | -1.712901 | -0.403463 |
| C | -2.675637 | -2.088313 | -0.001065 | H                                     | 2.299370  | -2.268685 | -1.187132 |
| C | -3.535233 | -2.815990 | 1.018788  | C                                     | 4.946672  | -0.782497 | 0.340642  |
| H | -4.429582 | -3.224389 | 0.534920  | H                                     | 4.846945  | 1.060034  | 1.454635  |
| H | -2.982043 | -3.644291 | 1.474900  | H                                     | 4.727648  | -2.585347 | -0.820296 |
| H | -3.855572 | -2.136184 | 1.816149  | H                                     | 0.317591  | -1.194101 | -0.727710 |
| C | -2.199433 | -3.039317 | -1.086239 | N                                     | 0.005351  | 0.067545  | 0.871103  |
| H | -1.560035 | -2.527533 | -1.809022 | H                                     | 0.451820  | 0.702177  | 1.518623  |
| H | -1.640785 | -3.874492 | -0.648153 | C                                     | -1.359783 | 0.099686  | 0.984986  |
| H | -3.064909 | -3.454190 | -1.617015 | O                                     | -1.944953 | 0.654923  | 1.898575  |
| C | -3.412865 | -0.882183 | -0.563980 | O                                     | -1.928676 | -0.590279 | -0.031117 |
| H | -3.608964 | -0.149102 | 0.227737  | C                                     | -3.391926 | -0.623398 | -0.150419 |
| H | -2.838220 | -0.392686 | -1.353947 | C                                     | -3.927674 | 0.789247  | -0.325957 |
| H | -4.376706 | -1.201348 | -0.978875 | H                                     | -5.002875 | 0.752730  | -0.538504 |
| C | 2.593141  | 0.078512  | 0.374040  | H                                     | -3.770274 | 1.388004  | 0.574426  |
| C | 3.729032  | 0.126947  | 1.181218  | H                                     | -3.436632 | 1.284265  | -1.173440 |
| C | 2.693302  | -0.462493 | -0.911246 | C                                     | -3.595608 | -1.438300 | -1.416880 |
| C | 4.950989  | -0.359988 | 0.722887  | H                                     | -3.169585 | -2.441696 | -1.307105 |
| H | 3.657009  | 0.553462  | 2.183222  | H                                     | -4.664827 | -1.539946 | -1.634260 |
| C | 3.911689  | -0.950710 | -1.368104 | H                                     | -3.114697 | -0.953253 | -2.274428 |
| H | 1.809440  | -0.491181 | -1.544233 | C                                     | -4.002648 | -1.327705 | 1.050404  |
| C | 5.042829  | -0.902721 | -0.554279 | H                                     | -3.858779 | -0.747497 | 1.964093  |
| H | 5.829075  | -0.314925 | 1.364883  | H                                     | -5.078071 | -1.468072 | 0.886480  |
| H | 3.981818  | -1.367706 | -2.371490 | H                                     | -3.550697 | -2.317203 | 1.185269  |
| H | 5.995046  | -1.284349 | -0.918937 | H                                     | 6.013235  | -0.921029 | 0.508281  |

|                                        |           |           |           |   |           |           |           |
|----------------------------------------|-----------|-----------|-----------|---|-----------|-----------|-----------|
| <b>IM4''</b>                           |           |           |           | H | -5.824079 | 0.721165  | 3.300351  |
| SCF energy in MeCN: -2990.549443 a.u.  |           |           |           | H | -6.807630 | 1.696915  | 1.237860  |
| Free energy in MeCN: -2989.749846 a.u. |           |           |           | P | -0.925881 | 1.838763  | -0.652585 |
|                                        |           |           |           | C | 0.591554  | 2.732182  | -1.123264 |
| C                                      | 1.559928  | -1.459922 | 1.294288  | C | 1.147809  | 3.640655  | -0.207311 |
| H                                      | 1.738947  | -2.096002 | 0.423903  | C | 1.303906  | 2.409328  | -2.285190 |
| H                                      | 1.168216  | -1.957655 | 2.180601  | C | 2.389958  | 4.212656  | -0.453948 |
| C                                      | 2.098967  | -0.197493 | 1.357062  | H | 0.601948  | 3.898707  | 0.700570  |
| H                                      | 2.083581  | 0.329113  | 2.315056  | C | 2.552338  | 2.977462  | -2.522134 |
| C                                      | 2.894158  | 0.416653  | 0.249289  | H | 0.873864  | 1.716808  | -3.008884 |
| H                                      | 2.511100  | 0.090717  | -0.727985 | C | 3.099635  | 3.875603  | -1.607349 |
| P                                      | -1.980245 | -1.315755 | 0.902032  | H | 2.807510  | 4.922598  | 0.257114  |
| C                                      | -1.795128 | -2.204519 | 2.478404  | H | 3.095841  | 2.723201  | -3.430445 |
| C                                      | -1.161106 | -1.549227 | 3.543835  | H | 4.074183  | 4.320911  | -1.797379 |
| C                                      | -2.292405 | -3.499166 | 2.663919  | C | -1.686016 | 1.255584  | -2.200296 |
| C                                      | -1.036653 | -2.174673 | 4.779669  | C | -2.726256 | 1.920307  | -2.858948 |
| H                                      | -0.758393 | -0.543694 | 3.392613  | C | -1.235821 | 0.024235  | -2.698809 |
| C                                      | -2.157670 | -4.124623 | 3.900506  | C | -3.299165 | 1.359408  | -3.997437 |
| H                                      | -2.783591 | -4.017441 | 1.841121  | H | -3.108784 | 2.862336  | -2.468172 |
| C                                      | -1.533308 | -3.465099 | 4.956763  | C | -1.801863 | -0.528153 | -3.842107 |
| H                                      | -0.545041 | -1.659377 | 5.602075  | H | -0.451866 | -0.515668 | -2.160876 |
| H                                      | -2.543645 | -5.132416 | 4.038700  | C | -2.839243 | 0.139300  | -4.490586 |
| H                                      | -1.428749 | -3.959459 | 5.920229  | H | -4.113220 | 1.877213  | -4.500544 |
| C                                      | -2.227217 | -2.586955 | -0.374818 | H | -1.446715 | -1.489617 | -4.209891 |
| C                                      | -1.093768 | -3.188665 | -0.938069 | H | -3.296613 | -0.295233 | -5.377155 |
| C                                      | -3.499322 | -3.001535 | -0.791557 | C | -1.981685 | 3.117547  | 0.082906  |
| C                                      | -1.227153 | -4.185797 | -1.897869 | C | -2.152557 | 4.362398  | -0.542247 |
| H                                      | -0.101334 | -2.869739 | -0.617215 | C | -2.594131 | 2.878222  | 1.317177  |
| C                                      | -3.628234 | -3.995156 | -1.757804 | C | -2.948102 | 5.336235  | 0.050030  |
| H                                      | -4.390839 | -2.552789 | -0.356738 | H | -1.645952 | 4.572156  | -1.484855 |
| C                                      | -2.496067 | -4.586495 | -2.312853 | C | -3.387402 | 3.857659  | 1.908088  |
| H                                      | -0.338920 | -4.651167 | -2.321026 | H | -2.444952 | 1.919094  | 1.813709  |
| H                                      | -4.620253 | -4.312268 | -2.072910 | C | -3.568108 | 5.083329  | 1.273586  |
| H                                      | -2.602742 | -5.364075 | -3.066346 | H | -3.077365 | 6.299589  | -0.438862 |
| Pd                                     | -0.073683 | 0.034596  | 0.561393  | H | -3.861117 | 3.661448  | 2.868129  |
| C                                      | -3.572927 | -0.448380 | 1.031461  | H | -4.185466 | 5.850290  | 1.736884  |
| C                                      | -4.142645 | 0.095043  | -0.131063 | H | 2.826431  | 1.511457  | 0.278821  |
| C                                      | -4.188552 | -0.214636 | 2.267734  | C | 4.412176  | 0.045272  | 0.275608  |
| C                                      | -5.300598 | 0.859318  | -0.055777 | C | 5.078619  | 0.560883  | 1.524874  |
| H                                      | -3.681346 | -0.094184 | -1.100432 | C | 4.983950  | -0.122234 | 2.742130  |
| C                                      | -5.348576 | 0.552874  | 2.335982  | C | 5.757648  | 1.780571  | 1.491932  |
| H                                      | -3.766511 | -0.637069 | 3.178614  | C | 5.567709  | 0.396399  | 3.894233  |
| C                                      | -5.903106 | 1.095159  | 1.179128  | H | 4.443697  | -1.068746 | 2.799565  |
| H                                      | -5.733235 | 1.271600  | -0.965851 | C | 6.339706  | 2.303089  | 2.643123  |

|                                        |           |           |           |    |           |           |           |
|----------------------------------------|-----------|-----------|-----------|----|-----------|-----------|-----------|
| H                                      | 5.836390  | 2.319900  | 0.546861  | C  | -3.202127 | -3.187985 | 4.824306  |
| C                                      | 6.248075  | 1.610157  | 3.847476  | H  | -1.821149 | -1.761833 | 5.665109  |
| H                                      | 5.493361  | -0.152120 | 4.831307  | H  | -4.511525 | -4.487710 | 3.708540  |
| H                                      | 6.875993  | 3.248914  | 2.596818  | H  | -3.424430 | -3.656731 | 5.781647  |
| H                                      | 4.844362  | 0.552803  | -0.598790 | C  | -2.400082 | -2.462157 | -0.460969 |
| N                                      | 4.623645  | -1.381068 | 0.123923  | C  | -1.260131 | -3.230845 | -0.731973 |
| H                                      | 4.889930  | -1.925664 | 0.931469  | C  | -3.589406 | -2.760830 | -1.137191 |
| C                                      | 4.206608  | -2.139487 | -0.936252 | C  | -1.311156 | -4.278449 | -1.646257 |
| O                                      | 4.137805  | -3.355057 | -0.910794 | H  | -0.328218 | -2.996160 | -0.213072 |
| O                                      | 3.897353  | -1.337333 | -1.982937 | C  | -3.633785 | -3.796836 | -2.066534 |
| C                                      | 3.194422  | -1.908909 | -3.138873 | H  | -4.488182 | -2.178594 | -0.937812 |
| C                                      | 1.884438  | -2.523675 | -2.669358 | C  | -2.496772 | -4.558754 | -2.322171 |
| H                                      | 1.250374  | -2.766868 | -3.531391 | H  | -0.419975 | -4.874409 | -1.835163 |
| H                                      | 2.050992  | -3.435011 | -2.087749 | H  | -4.565290 | -4.013375 | -2.587650 |
| H                                      | 1.339175  | -1.798441 | -2.044955 | H  | -2.534946 | -5.372448 | -3.044724 |
| C                                      | 2.918496  | -0.684181 | -3.993673 | Pd | -0.159179 | -0.012115 | 0.810266  |
| H                                      | 3.851152  | -0.180757 | -4.271056 | C  | -3.758392 | -0.137686 | 0.520917  |
| H                                      | 2.393770  | -0.970350 | -4.912246 | C  | -3.979310 | 0.420835  | -0.747976 |
| H                                      | 2.291019  | 0.030262  | -3.445790 | C  | -4.619541 | 0.216116  | 1.566422  |
| C                                      | 4.082813  | -2.901399 | -3.868179 | C  | -5.026634 | 1.308080  | -0.963645 |
| H                                      | 4.293602  | -3.775599 | -3.249012 | H  | -3.321911 | 0.152417  | -1.575240 |
| H                                      | 3.587991  | -3.231178 | -4.789526 | C  | -5.667434 | 1.109217  | 1.348430  |
| H                                      | 5.031862  | -2.430485 | -4.147287 | H  | -4.470786 | -0.206092 | 2.559829  |
| H                                      | 6.708809  | 2.013038  | 4.747017  | C  | -5.872683 | 1.660767  | 0.086963  |
|                                        |           |           |           | H  | -5.172285 | 1.733062  | -1.956094 |
| <b>IM5''</b>                           |           |           |           | H  | -6.327463 | 1.373741  | 2.173756  |
| SCF energy in MeCN: -2990.702598 a.u.  |           |           |           | H  | -6.686280 | 2.365473  | -0.077091 |
| Free energy in MeCN: -2989.903637 a.u. |           |           |           | P  | -0.414924 | 1.930077  | -0.505433 |
|                                        |           |           |           | C  | 1.155440  | 2.780113  | -0.927675 |
| C                                      | 1.311498  | -1.336091 | 1.699816  | C  | 1.800819  | 3.504637  | 0.087045  |
| H                                      | 1.479346  | -2.209552 | 1.061974  | C  | 1.816882  | 2.597463  | -2.146300 |
| H                                      | 1.027203  | -1.577391 | 2.725249  | C  | 3.071596  | 4.028884  | -0.112214 |
| C                                      | 1.932391  | -0.108924 | 1.393681  | H  | 1.304883  | 3.637658  | 1.050030  |
| H                                      | 2.068714  | 0.605621  | 2.211969  | C  | 3.096003  | 3.116852  | -2.342156 |
| C                                      | 2.870858  | 0.070723  | 0.233809  | H  | 1.334994  | 2.038255  | -2.947906 |
| H                                      | 2.487012  | -0.445080 | -0.657457 | C  | 3.727612  | 3.829994  | -1.328095 |
| P                                      | -2.237392 | -1.127284 | 0.788158  | H  | 3.562549  | 4.577622  | 0.690173  |
| C                                      | -2.622467 | -1.994638 | 2.359334  | H  | 3.599070  | 2.960217  | -3.295580 |
| C                                      | -2.009471 | -1.538674 | 3.531731  | H  | 4.728987  | 4.229772  | -1.480598 |
| C                                      | -3.528597 | -3.058410 | 2.436209  | C  | -1.037715 | 1.398920  | -2.150911 |
| C                                      | -2.302818 | -2.126821 | 4.759284  | C  | -1.867604 | 2.172223  | -2.968737 |
| H                                      | -1.290689 | -0.718551 | 3.464457  | C  | -0.701628 | 0.101783  | -2.566063 |
| C                                      | -3.811637 | -3.654778 | 3.660931  | C  | -2.355152 | 1.655186  | -4.167588 |
| H                                      | -4.009918 | -3.423476 | 1.528199  | H  | -2.159649 | 3.174136  | -2.654526 |







|   |           |           |           |   |           |           |           |
|---|-----------|-----------|-----------|---|-----------|-----------|-----------|
| H | -1.554314 | 1.303614  | 1.965813  | H | -4.626462 | -2.166764 | 0.519167  |
| C | -4.183008 | 3.295265  | 1.142534  | C | -3.993031 | -1.864257 | 3.845122  |
| H | -4.394712 | 4.347575  | -0.727008 | H | -2.097590 | -1.266069 | 4.694763  |
| H | -3.706465 | 2.102845  | 2.882967  | H | -5.737673 | -2.428511 | 2.707815  |
| H | -5.135072 | 3.646235  | 1.537933  | H | -4.489195 | -1.970985 | 4.808618  |
| C | -0.081079 | 1.943784  | -2.256135 | C | -1.755649 | -3.025164 | -0.981178 |
| C | -0.045899 | 3.185600  | -2.905222 | C | -2.433747 | -4.142119 | -0.481332 |
| C | -0.066281 | 0.778853  | -3.028909 | C | -0.913805 | -3.192891 | -2.087900 |
| C | -0.033416 | 3.254383  | -4.294035 | C | -2.291697 | -5.385868 | -1.091319 |
| H | -0.010877 | 4.101015  | -2.313595 | H | -3.063850 | -4.047603 | 0.401315  |
| C | -0.052494 | 0.846171  | -4.419064 | C | -0.784924 | -4.431150 | -2.707496 |
| H | -0.056858 | -0.186491 | -2.516978 | H | -0.315904 | -2.350359 | -2.437495 |
| C | -0.042288 | 2.084947  | -5.053437 | C | -1.475789 | -5.532135 | -2.210326 |
| H | -0.006774 | 4.224818  | -4.787158 | H | -2.820329 | -6.246539 | -0.684433 |
| H | -0.043760 | -0.071910 | -5.005821 | H | -0.117565 | -4.539334 | -3.561021 |
| H | -0.027142 | 2.142211  | -6.140547 | H | -1.365287 | -6.506641 | -2.682834 |
| C | 0.998875  | 3.187143  | 0.036188  | C | 0.387143  | 0.270571  | 5.362884  |
| C | 0.572215  | 4.291057  | 0.784000  | C | 0.176518  | 1.288424  | 4.429602  |
| C | 2.345061  | 3.100914  | -0.345377 | C | 0.786358  | 1.231936  | 3.185249  |
| C | 1.475764  | 5.292262  | 1.133625  | C | 1.612653  | 0.153506  | 2.813388  |
| H | -0.469213 | 4.373207  | 1.094246  | C | 1.846054  | -0.838800 | 3.780323  |
| C | 3.243454  | 4.099520  | 0.011270  | C | 1.235003  | -0.782886 | 5.031725  |
| H | 2.703347  | 2.232177  | -0.896803 | H | -0.458166 | 2.139285  | 4.678655  |
| C | 2.810791  | 5.199457  | 0.749462  | H | 0.634163  | 2.042107  | 2.469981  |
| H | 1.132121  | 6.148186  | 1.712520  | H | 2.528930  | -1.658467 | 3.559906  |
| H | 4.288266  | 4.002358  | -0.278664 | H | 1.433918  | -1.569737 | 5.758553  |
| H | 3.515151  | 5.979929  | 1.032988  | C | 2.135757  | 0.101731  | 1.429359  |
| C | -3.117082 | -0.543291 | -1.305461 | C | 0.793809  | -2.454828 | 0.902126  |
| C | -2.999239 | -0.638614 | -2.699683 | H | 1.286070  | -2.414236 | 1.888384  |
| C | -4.145579 | 0.251635  | -0.782540 | C | 1.633740  | -3.198427 | -0.076205 |
| C | -3.871870 | 0.040660  | -3.541598 | H | 1.737275  | -4.278804 | 0.099910  |
| H | -2.218764 | -1.259254 | -3.137427 | C | 2.263110  | -2.698949 | -1.144568 |
| C | -5.031196 | 0.914939  | -1.626717 | H | 2.196482  | -1.635513 | -1.396156 |
| H | -4.253578 | 0.365105  | 0.293974  | H | 2.864073  | -3.327660 | -1.801873 |
| C | -4.896538 | 0.818320  | -3.008112 | H | -0.122601 | -3.038898 | 1.095091  |
| H | -3.750088 | -0.044243 | -4.620456 | H | 2.393657  | 1.097232  | 1.061283  |
| H | -5.825331 | 1.521900  | -1.193454 | H | -0.085314 | 0.312517  | 6.343198  |
| H | -5.584982 | 1.345729  | -3.666326 | N | 3.295349  | -0.721478 | 1.248449  |
| C | -2.721266 | -1.580944 | 1.358899  | H | 3.208798  | -1.712347 | 1.438446  |
| C | -2.026912 | -1.335260 | 2.551698  | C | 4.219954  | -0.427004 | 0.287992  |
| C | -4.064938 | -1.979404 | 1.434836  | O | 5.043018  | -1.492328 | 0.127493  |
| C | -2.658892 | -1.472734 | 3.784869  | C | 6.124876  | -1.427680 | -0.854593 |
| H | -0.981129 | -1.019771 | 2.512688  | C | 7.119923  | -0.344640 | -0.464540 |
| C | -4.694149 | -2.120617 | 2.667685  | H | 6.668965  | 0.647667  | -0.541450 |

|                                        |           |           |           |    |           |           |           |
|----------------------------------------|-----------|-----------|-----------|----|-----------|-----------|-----------|
| H                                      | 7.466485  | -0.495917 | 0.564575  | H  | -4.990789 | -3.705849 | -2.397707 |
| H                                      | 7.994327  | -0.387445 | -1.125769 | H  | -3.089067 | -5.075067 | -3.220872 |
| C                                      | 5.568991  | -1.212920 | -2.255121 | Pd | -0.019021 | -0.124118 | 0.592577  |
| H                                      | 4.820349  | -1.977658 | -2.492114 | C  | -3.598065 | -0.041708 | 0.872286  |
| H                                      | 5.108021  | -0.228153 | -2.355184 | C  | -4.083387 | 0.541715  | -0.307906 |
| H                                      | 6.380967  | -1.296993 | -2.988220 | C  | -4.170547 | 0.329731  | 2.096626  |
| C                                      | 6.752163  | -2.807454 | -0.738411 | C  | -5.107476 | 1.481368  | -0.260798 |
| H                                      | 7.588423  | -2.905716 | -1.440240 | H  | -3.674169 | 0.242349  | -1.271493 |
| H                                      | 7.129555  | -2.980513 | 0.275599  | C  | -5.197465 | 1.268389  | 2.136866  |
| H                                      | 6.014434  | -3.585760 | -0.965703 | H  | -3.816013 | -0.118585 | 3.024019  |
| O                                      | 4.301128  | 0.635778  | -0.311490 | C  | -5.663442 | 1.852037  | 0.961372  |
| <b>TS2a''</b>                          |           |           |           | H  | -5.473983 | 1.919174  | -1.187796 |
| SCF energy in MeCN: -2990.520653 a.u.  |           |           |           | H  | -5.638366 | 1.540672  | 3.094204  |
| Free energy in MeCN: -2989.723391 a.u. |           |           |           | H  | -6.465009 | 2.587042  | 0.997175  |
|                                        |           |           |           | P  | -0.499503 | 1.858515  | -0.628403 |
|                                        |           |           |           | C  | 1.019007  | 2.634687  | -1.289684 |
| C                                      | 1.224906  | -1.724826 | 1.451805  | C  | 1.762154  | 3.515206  | -0.489823 |
| H                                      | 1.413315  | -2.369891 | 0.589075  | C  | 1.544904  | 2.228623  | -2.520692 |
| H                                      | 0.848614  | -2.235538 | 2.336430  | C  | 3.005940  | 3.971533  | -0.915313 |
| C                                      | 1.929819  | -0.514087 | 1.579616  | H  | 1.363071  | 3.845297  | 0.469916  |
| H                                      | 1.994662  | -0.035681 | 2.559240  | C  | 2.794615  | 2.679823  | -2.938656 |
| C                                      | 2.528554  | 0.149298  | 0.480335  | H  | 0.969592  | 1.561981  | -3.163519 |
| H                                      | 2.397920  | -0.248275 | -0.526831 | C  | 3.530508  | 3.547352  | -2.135928 |
| P                                      | -2.144562 | -1.142806 | 0.810223  | H  | 3.568422  | 4.662377  | -0.289346 |
| C                                      | -2.256970 | -2.085800 | 2.369182  | H  | 3.187916  | 2.358776  | -3.901857 |
| C                                      | -1.571314 | -1.619549 | 3.498632  | H  | 4.503877  | 3.904731  | -2.466257 |
| C                                      | -3.055795 | -3.229222 | 2.477038  | C  | -1.464720 | 1.431914  | -2.120093 |
| C                                      | -1.690022 | -2.280434 | 4.717523  | C  | -2.381518 | 2.300912  | -2.719592 |
| H                                      | -0.938947 | -0.731731 | 3.414321  | C  | -1.316690 | 0.136255  | -2.635773 |
| C                                      | -3.162246 | -3.895444 | 3.694431  | C  | -3.142886 | 1.875123  | -3.804626 |
| H                                      | -3.593979 | -3.601099 | 1.605630  | H  | -2.529081 | 3.301864  | -2.316712 |
| C                                      | -2.483014 | -3.422147 | 4.814350  | C  | -2.075104 | -0.287572 | -3.722956 |
| H                                      | -1.157070 | -1.908997 | 5.590634  | H  | -0.620482 | -0.556511 | -2.155349 |
| H                                      | -3.780019 | -4.788095 | 3.767114  | C  | -2.995909 | 0.582051  | -4.304272 |
| H                                      | -2.569295 | -3.945108 | 5.764594  | H  | -3.862386 | 2.555101  | -4.256815 |
| C                                      | -2.507487 | -2.362809 | -0.495596 | H  | -1.959740 | -1.303889 | -4.097506 |
| C                                      | -1.442114 | -3.143335 | -0.963597 | H  | -3.602402 | 0.252148  | -5.145285 |
| C                                      | -3.788644 | -2.578774 | -1.017856 | C  | -1.364284 | 3.220040  | 0.208375  |
| C                                      | -1.649201 | -4.118061 | -1.933462 | C  | -1.424120 | 4.509902  | -0.341453 |
| H                                      | -0.443847 | -2.984413 | -0.553697 | C  | -1.975942 | 2.975472  | 1.442903  |
| C                                      | -3.991181 | -3.547577 | -1.997886 | C  | -2.108902 | 5.522208  | 0.321189  |
| H                                      | -4.631762 | -1.992776 | -0.655734 | H  | -0.919246 | 4.722907  | -1.284354 |
| C                                      | -2.925215 | -4.316594 | -2.458171 | C  | -2.659563 | 3.991721  | 2.104405  |
| H                                      | -0.813162 | -4.724106 | -2.278354 | H  | -1.916188 | 1.979594  | 1.884302  |





|   |           |           |           |   |           |           |           |
|---|-----------|-----------|-----------|---|-----------|-----------|-----------|
| H | 0.474201  | 5.676115  | -3.308054 | H | -3.310132 | -6.161232 | -1.034930 |
| H | -1.572576 | 2.166228  | -4.723574 | H | -0.408891 | -4.559446 | -3.777473 |
| H | -0.682244 | 4.454779  | -5.137480 | H | -1.771580 | -6.477643 | -2.959490 |
| C | 1.183562  | 2.941649  | 0.822561  | C | 0.339979  | -1.586991 | 4.757389  |
| C | 0.950633  | 3.764357  | 1.932894  | C | 0.350783  | -0.299374 | 4.219325  |
| C | 2.504180  | 2.752954  | 0.386787  | C | 0.990036  | -0.051421 | 3.011242  |
| C | 2.014322  | 4.386102  | 2.583298  | C | 1.630865  | -1.084108 | 2.304020  |
| H | -0.066196 | 3.922184  | 2.291769  | C | 1.608766  | -2.373883 | 2.857833  |
| C | 3.562536  | 3.377774  | 1.036273  | C | 0.970530  | -2.621442 | 4.069815  |
| H | 2.710213  | 2.093179  | -0.457148 | H | -0.135282 | 0.521004  | 4.746909  |
| C | 3.320338  | 4.196054  | 2.138414  | H | 1.023892  | 0.961285  | 2.606614  |
| H | 1.818039  | 5.024651  | 3.443651  | H | 2.095434  | -3.198877 | 2.336145  |
| H | 4.578243  | 3.202687  | 0.686186  | H | 0.969553  | -3.629950 | 4.480766  |
| H | 4.148481  | 4.677737  | 2.655757  | C | 2.314599  | -0.778785 | 1.035406  |
| C | -3.240085 | -0.401037 | -1.523926 | C | 1.552214  | -2.186745 | -0.502061 |
| C | -3.385561 | -0.691606 | -2.887104 | H | 1.999681  | -2.942248 | 0.147733  |
| C | -3.884577 | 0.736376  | -1.011801 | C | 2.333834  | -1.863335 | -1.696200 |
| C | -4.147687 | 0.130767  | -3.712732 | H | 3.330165  | -2.310998 | -1.775302 |
| H | -2.903400 | -1.572924 | -3.308408 | C | 1.937668  | -1.038983 | -2.681195 |
| C | -4.651425 | 1.550869  | -1.838312 | H | 0.977010  | -0.517952 | -2.628585 |
| H | -3.790369 | 0.983264  | 0.045754  | H | 2.566682  | -0.830734 | -3.544287 |
| C | -4.781898 | 1.256306  | -3.193631 | H | 0.541309  | -2.535290 | -0.737863 |
| H | -4.249646 | -0.116602 | -4.768787 | H | 2.371254  | 0.284642  | 0.803135  |
| H | -5.145597 | 2.425286  | -1.416466 | H | -0.149884 | -1.780073 | 5.710715  |
| H | -5.376758 | 1.898931  | -3.840350 | N | 3.622719  | -1.303172 | 0.901394  |
| C | -3.035121 | -1.598573 | 1.084195  | H | 3.774191  | -2.289654 | 1.072448  |
| C | -2.309898 | -1.807109 | 2.264517  | C | 4.563348  | -0.705491 | 0.098399  |
| C | -4.434681 | -1.618316 | 1.138004  | O | 5.559307  | -1.595109 | -0.124020 |
| C | -2.966973 | -2.035893 | 3.469690  | C | 6.707269  | -1.193691 | -0.950027 |
| H | -1.217014 | -1.771555 | 2.229902  | C | 7.433513  | -0.021719 | -0.307635 |
| C | -5.091189 | -1.834374 | 2.346576  | H | 6.824121  | 0.884454  | -0.328517 |
| H | -5.011610 | -1.454560 | 0.227791  | H | 7.686760  | -0.252426 | 0.733658  |
| C | -4.359325 | -2.045904 | 3.513616  | H | 8.369048  | 0.170946  | -0.846807 |
| H | -2.384442 | -2.195495 | 4.375837  | C | 6.240060  | -0.880081 | -2.363307 |
| H | -6.179804 | -1.840850 | 2.376132  | H | 5.713671  | -1.740124 | -2.795189 |
| H | -4.875293 | -2.214805 | 4.457820  | H | 5.572939  | -0.014673 | -2.379005 |
| C | -2.068058 | -2.994441 | -1.236538 | H | 7.108250  | -0.665529 | -2.998190 |
| C | -2.823113 | -4.082660 | -0.781329 | C | 7.576363  | -2.439667 | -0.932390 |
| C | -1.191856 | -3.191383 | -2.316482 | H | 8.478877  | -2.277599 | -1.532340 |
| C | -2.714949 | -5.325341 | -1.400083 | H | 7.881808  | -2.688510 | 0.089919  |
| H | -3.500268 | -3.958511 | 0.063280  | H | 7.036161  | -3.297557 | -1.348096 |
| C | -1.094732 | -4.430395 | -2.941593 | O | 4.505095  | 0.437668  | -0.315812 |
| H | -0.570842 | -2.360463 | -2.663016 |   |           |           |           |
| C | -1.855713 | -5.502631 | -2.482393 |   |           |           |           |

**IM1'''**

|                                        |           |           |           |   |           |           |           |
|----------------------------------------|-----------|-----------|-----------|---|-----------|-----------|-----------|
| SCF energy in MeCN: -3218.648089 a.u.  |           |           |           | C | 6.111988  | -2.720616 | 2.199480  |
| Free energy in MeCN: -3217.815837 a.u. |           |           |           | H | 4.770920  | -3.102337 | 3.842308  |
|                                        |           |           |           | H | 7.183887  | -2.272668 | 0.379703  |
| C                                      | -1.347797 | -0.297872 | -0.491665 | H | 7.011898  | -2.907600 | 2.783519  |
| H                                      | -1.152128 | 0.036522  | 0.535345  | P | 3.337215  | 1.715240  | 0.136535  |
| H                                      | -1.318749 | -1.393386 | -0.494407 | C | 3.060606  | 3.518384  | 0.356543  |
| C                                      | -0.423511 | 0.321854  | -1.476978 | C | 2.491067  | 4.215423  | -0.717879 |
| H                                      | -0.450375 | -0.115300 | -2.478608 | C | 3.391163  | 4.225116  | 1.518200  |
| C                                      | 0.005495  | 1.660813  | -1.334475 | C | 2.268490  | 5.585035  | -0.638789 |
| H                                      | -0.350300 | 2.263106  | -0.494463 | H | 2.219174  | 3.667358  | -1.621141 |
| P                                      | 2.303756  | -1.832604 | -0.309245 | C | 3.155900  | 5.596511  | 1.600648  |
| C                                      | 2.628421  | -2.780430 | -1.843694 | H | 3.836505  | 3.703551  | 2.365086  |
| C                                      | 2.221937  | -2.231361 | -3.065183 | C | 2.596949  | 6.279193  | 0.524608  |
| C                                      | 3.258478  | -4.032875 | -1.840243 | H | 1.826198  | 6.111206  | -1.483212 |
| C                                      | 2.429853  | -2.920917 | -4.257732 | H | 3.415300  | 6.133365  | 2.512008  |
| H                                      | 1.743895  | -1.249235 | -3.065412 | H | 2.412901  | 7.350079  | 0.592576  |
| C                                      | 3.466496  | -4.720653 | -3.030885 | C | 3.848573  | 1.194039  | 1.815455  |
| H                                      | 3.590996  | -4.464849 | -0.896020 | C | 5.164977  | 0.911938  | 2.189794  |
| C                                      | 3.050981  | -4.166404 | -4.241158 | C | 2.827840  | 1.043674  | 2.767252  |
| H                                      | 2.108727  | -2.481993 | -5.200818 | C | 5.455277  | 0.504119  | 3.490274  |
| H                                      | 3.955183  | -5.693669 | -3.015720 | H | 5.969076  | 0.994924  | 1.459627  |
| H                                      | 3.217391  | -4.705518 | -5.172452 | C | 3.121267  | 0.650001  | 4.067646  |
| C                                      | 0.955686  | -2.752311 | 0.522796  | H | 1.794426  | 1.245965  | 2.476140  |
| C                                      | 0.362289  | -2.154051 | 1.645899  | C | 4.439532  | 0.380037  | 4.432689  |
| C                                      | 0.411461  | -3.941152 | 0.027544  | H | 6.484681  | 0.276093  | 3.763382  |
| C                                      | -0.742280 | -2.732340 | 2.258920  | H | 2.318937  | 0.545754  | 4.796604  |
| H                                      | 0.757218  | -1.202856 | 2.012660  | H | 4.671417  | 0.063535  | 5.448500  |
| C                                      | -0.703733 | -4.513264 | 0.636814  | C | 4.883077  | 1.713028  | -0.848860 |
| H                                      | 0.846801  | -4.415287 | -0.850727 | C | 5.903274  | 2.652140  | -0.649285 |
| C                                      | -1.283455 | -3.911501 | 1.749083  | C | 5.034220  | 0.754329  | -1.856699 |
| H                                      | -1.210777 | -2.239762 | 3.108624  | C | 7.055373  | 2.618907  | -1.428206 |
| H                                      | -1.125693 | -5.431427 | 0.230895  | H | 5.785515  | 3.418723  | 0.117748  |
| H                                      | -2.168188 | -4.347231 | 2.209474  | C | 6.188966  | 0.717845  | -2.634413 |
| Pd                                     | 1.597396  | 0.392212  | -0.689108 | H | 4.224421  | 0.041227  | -2.031436 |
| O                                      | -2.727666 | 0.094987  | -0.818268 | C | 7.200891  | 1.650022  | -2.420159 |
| C                                      | -3.642193 | -0.242150 | 0.091127  | H | 7.840467  | 3.355613  | -1.265676 |
| O                                      | -3.417178 | -0.849661 | 1.121919  | H | 6.292098  | -0.033361 | -3.416063 |
| C                                      | 3.786769  | -2.249711 | 0.694797  | H | 8.100455  | 1.629541  | -3.033117 |
| C                                      | 3.703510  | -2.599375 | 2.046939  | H | 0.285344  | 2.238538  | -2.215889 |
| C                                      | 5.057594  | -2.127756 | 0.112504  | C | -5.010816 | 0.286406  | -0.294638 |
| C                                      | 4.857346  | -2.831609 | 2.790749  | H | -5.269008 | -0.051607 | -1.307736 |
| H                                      | 2.729813  | -2.702377 | 2.523666  | N | -5.983290 | -0.250195 | 0.621615  |
| C                                      | 6.208508  | -2.365884 | 0.855388  | H | -5.631332 | -0.617349 | 1.496755  |
| H                                      | 5.146211  | -1.860715 | -0.940442 | C | -7.210894 | -0.651670 | 0.178220  |



|   |            |           |           |   |           |           |           |
|---|------------|-----------|-----------|---|-----------|-----------|-----------|
| O | -7.610710  | -0.503322 | -0.963626 | H | 6.248952  | 1.261263  | -0.981796 |
| O | -7.891024  | -1.209160 | 1.207692  | C | 1.847301  | -1.286416 | 0.822126  |
| C | -9.279798  | -1.630939 | 0.995891  | H | 2.067511  | -2.318627 | 1.117105  |
| C | -10.132206 | -0.434895 | 0.598925  | H | 1.425851  | -0.790910 | 1.704765  |
| H | -10.022742 | 0.371099  | 1.334603  | C | 0.748534  | -1.337313 | -0.247899 |
| H | -9.845679  | -0.050153 | -0.383109 | C | -0.436435 | -2.157520 | 0.263664  |
| H | -11.188888 | -0.728096 | 0.571772  | O | -0.367101 | -2.969877 | 1.157270  |
| C | -9.339451  | -2.748207 | -0.034541 | O | -1.553939 | -1.894762 | -0.442123 |
| H | -9.049555  | -2.388340 | -1.024062 | C | -2.747944 | -2.504463 | 0.092525  |
| H | -8.673234  | -3.570434 | 0.252788  | H | -2.542530 | -3.569485 | 0.266346  |
| H | -10.360544 | -3.145605 | -0.089074 | H | -2.959829 | -2.044817 | 1.067295  |
| C | -9.679560  | -2.145210 | 2.368989  | C | -3.849592 | -2.291927 | -0.878910 |
| H | -10.717568 | -2.496721 | 2.354056  | H | -3.663498 | -2.643062 | -1.895711 |
| H | -9.037872  | -2.978998 | 2.675428  | C | -5.020910 | -1.743792 | -0.562182 |
| H | -9.594208  | -1.353206 | 3.121238  | H | -5.224585 | -1.379915 | 0.444956  |
| C | -4.995896  | 1.835217  | -0.289984 | H | -5.823723 | -1.641819 | -1.288470 |
| H | -4.689829  | 2.167447  | 0.712782  | N | 0.344626  | -0.022157 | -0.702472 |
| H | -4.221412  | 2.166985  | -0.992920 | H | 1.143581  | -1.857939 | -1.132879 |
| C | -6.332369  | 2.413082  | -0.648319 | H | 0.377739  | 0.196739  | -1.686291 |
| C | -6.666237  | 2.651566  | -1.983880 | C | -0.515726 | 0.703392  | 0.071300  |
| C | -7.295257  | 2.657876  | 0.335007  | O | -0.801824 | 0.393577  | 1.218200  |
| C | -7.931598  | 3.109792  | -2.331976 | O | -0.955601 | 1.775915  | -0.613045 |
| H | -5.923545  | 2.461282  | -2.759834 | C | -1.944670 | 2.665485  | 0.015196  |
| C | -8.562887  | 3.117668  | -0.008878 | C | -2.197631 | 3.694441  | -1.073546 |
| H | -7.047403  | 2.470467  | 1.380336  | H | -2.928925 | 4.434123  | -0.729211 |
| C | -8.886494  | 3.340928  | -1.344405 | H | -1.272835 | 4.220309  | -1.335667 |
| H | -8.175176  | 3.286489  | -3.378542 | H | -2.589849 | 3.217684  | -1.978678 |
| H | -9.302732  | 3.300018  | 0.769608  | C | -1.345100 | 3.319942  | 1.249459  |
| H | -9.878963  | 3.697812  | -1.615351 | H | -1.157291 | 2.585823  | 2.035990  |

### 1a'''

SCF energy in MeCN: -1017.597956 a.u.

Free energy in MeCN: -1017.270107 a.u.

|   |          |           |           |
|---|----------|-----------|-----------|
| C | 5.226636 | -0.628172 | -0.793934 |
| C | 4.094477 | -1.283592 | -0.318586 |
| C | 3.081200 | -0.582821 | 0.342459  |
| C | 3.228959 | 0.797544  | 0.511487  |
| C | 4.359241 | 1.457726  | 0.039044  |
| C | 5.362019 | 0.746481  | -0.615924 |
| H | 6.008768 | -1.192819 | -1.299181 |
| H | 3.995362 | -2.362236 | -0.451766 |
| H | 2.445163 | 1.353044  | 1.028157  |
| H | 4.459875 | 2.532144  | 0.185574  |

|   |           |          |           |
|---|-----------|----------|-----------|
| H | -0.401488 | 3.818798 | 0.997798  |
| H | -2.034784 | 4.080181 | 1.635623  |
| C | -3.213633 | 1.885465 | 0.325946  |
| H | -3.565308 | 1.355850 | -0.567557 |
| H | -3.050385 | 1.156353 | 1.123728  |
| H | -4.002791 | 2.578818 | 0.641398  |

### 2a'''

SCF energy in MeCN: -828.979486 a.u.

Free energy in MeCN: -828.662012 a.u.

|   |          |          |           |
|---|----------|----------|-----------|
| C | 2.433805 | 3.198400 | -0.232858 |
| H | 2.753837 | 3.392130 | 0.791804  |
| H | 3.218368 | 3.137858 | -0.984140 |
| C | 1.146330 | 3.047063 | -0.542089 |

|   |           |           |           |    |           |           |           |
|---|-----------|-----------|-----------|----|-----------|-----------|-----------|
| H | 0.867945  | 2.840986  | -1.577075 | H  | 1.149716  | 2.059719  | 0.692266  |
| C | 0.039103  | 3.098705  | 0.457416  | H  | 1.168926  | 2.020953  | -1.154197 |
| H | 0.455281  | 3.375787  | 1.437144  | C  | 1.711145  | 0.181217  | -0.185594 |
| H | -0.683376 | 3.886887  | 0.190974  | H  | 1.965495  | -0.301499 | -1.131956 |
| C | -0.750820 | 1.783531  | 0.614883  | C  | 2.124362  | -0.522512 | 1.068044  |
| H | -1.418110 | 1.911113  | 1.480497  | H  | 1.809772  | 0.072375  | 1.937980  |
| C | -1.654522 | 1.476117  | -0.588786 | P  | -2.135345 | 1.805115  | 0.151711  |
| H | -2.276317 | 2.369032  | -0.747926 | C  | -1.572464 | 3.401818  | -0.519552 |
| H | -1.039187 | 1.339721  | -1.483033 | C  | -1.079773 | 3.443507  | -1.832299 |
| N | 0.111432  | 0.666779  | 0.980135  | C  | -1.602220 | 4.577579  | 0.238902  |
| C | -2.531503 | 0.275938  | -0.364441 | C  | -0.647318 | 4.644608  | -2.383005 |
| C | -2.133975 | -0.995796 | -0.788562 | H  | -1.030670 | 2.523719  | -2.419829 |
| C | -3.746362 | 0.401158  | 0.316442  | C  | -1.156243 | 5.775576  | -0.313174 |
| C | -2.928670 | -2.109914 | -0.535689 | H  | -1.971536 | 4.559029  | 1.263049  |
| H | -1.189038 | -1.100886 | -1.320775 | C  | -0.682429 | 5.812088  | -1.621235 |
| C | -4.544829 | -0.710541 | 0.569572  | H  | -0.272898 | 4.668277  | -3.404310 |
| H | -4.072075 | 1.389197  | 0.647741  | H  | -1.179947 | 6.684184  | 0.284748  |
| C | -4.136364 | -1.972295 | 0.144584  | H  | -0.333051 | 6.749966  | -2.047588 |
| H | -2.602814 | -3.092458 | -0.875116 | C  | -2.287088 | 2.041473  | 1.949671  |
| H | -5.491216 | -0.590267 | 1.095198  | C  | -1.209706 | 1.679487  | 2.769154  |
| H | -4.758827 | -2.843945 | 0.340292  | C  | -3.428621 | 2.607651  | 2.532829  |
| H | 0.338070  | 0.558312  | 1.957934  | C  | -1.269527 | 1.878250  | 4.144136  |
| C | 0.952888  | 0.025623  | 0.117495  | H  | -0.326692 | 1.222745  | 2.316736  |
| O | 0.913002  | 0.099761  | -1.101061 | C  | -3.488557 | 2.798717  | 3.910000  |
| O | 1.808792  | -0.738861 | 0.837749  | H  | -4.272306 | 2.895816  | 1.906798  |
| C | 2.763702  | -1.600655 | 0.131837  | C  | -2.411437 | 2.435928  | 4.716089  |
| C | 3.480373  | -2.299735 | 1.275547  | H  | -0.426515 | 1.593665  | 4.770604  |
| H | 4.244915  | -2.980234 | 0.883959  | H  | -4.379773 | 3.237287  | 4.354227  |
| H | 3.971119  | -1.571448 | 1.930780  | H  | -2.462308 | 2.588441  | 5.792261  |
| H | 2.776184  | -2.883640 | 1.878761  | Pd | -0.607333 | 0.084131  | -0.342401 |
| C | 2.021698  | -2.610875 | -0.731489 | C  | -3.837322 | 1.599798  | -0.457931 |
| H | 1.256272  | -3.128396 | -0.140034 | C  | -4.721014 | 0.754041  | 0.231626  |
| H | 1.538384  | -2.129942 | -1.584779 | C  | -4.246217 | 2.164985  | -1.674719 |
| H | 2.725512  | -3.364121 | -1.106322 | C  | -5.980675 | 0.479627  | -0.289097 |
| C | 3.734377  | -0.748909 | -0.671393 | H  | -4.426817 | 0.319988  | 1.186261  |
| H | 3.226100  | -0.229061 | -1.486420 | C  | -5.508156 | 1.884473  | -2.190075 |
| H | 4.211712  | -0.002813 | -0.024726 | H  | -3.581062 | 2.834524  | -2.217892 |
| H | 4.521498  | -1.385371 | -1.093991 | C  | -6.375804 | 1.037993  | -1.503162 |
|   |           |           |           | H  | -6.656937 | -0.172102 | 0.261115  |
|   |           |           |           | H  | -5.816828 | 2.337986  | -3.129977 |
|   |           |           |           | H  | -7.361715 | 0.821052  | -1.909105 |
|   |           |           |           | P  | -1.901330 | -1.861602 | -0.379612 |
|   |           |           |           | C  | -0.642649 | -3.161052 | -0.140824 |
| C | 1.212098  | 1.462700  | -0.220251 | C  | 0.374590  | -3.286531 | -1.102709 |

**IM4'''**

SCF energy in MeCN: -3029.87849 a.u.

Free energy in MeCN: -3029.047307 a.u.



|    |           |           |           |   |           |           |           |
|----|-----------|-----------|-----------|---|-----------|-----------|-----------|
| H  | -3.002513 | 6.617631  | 0.029456  | C | -4.187145 | -2.414743 | 3.271973  |
| H  | -1.581770 | 6.943251  | -1.982418 | H | -5.398224 | -3.710531 | 2.047935  |
| C  | -2.509658 | 1.909751  | 1.926807  | H | -2.778092 | -1.098054 | 4.247161  |
| C  | -1.363804 | 1.829985  | 2.731103  | H | -4.861334 | -2.461067 | 4.125638  |
| C  | -3.742153 | 2.162769  | 2.540562  | C | -2.339259 | -2.568614 | -1.798312 |
| C  | -1.448003 | 1.994970  | 4.109988  | C | -2.372682 | -3.906112 | -2.213759 |
| H  | -0.403018 | 1.619306  | 2.255516  | C | -3.116325 | -1.626100 | -2.483761 |
| C  | -3.828220 | 2.317772  | 3.922047  | C | -3.169608 | -4.290504 | -3.288531 |
| H  | -4.645534 | 2.228006  | 1.935358  | H | -1.768756 | -4.648633 | -1.691649 |
| C  | -2.683223 | 2.233274  | 4.710018  | C | -3.921623 | -2.014756 | -3.549767 |
| H  | -0.547851 | 1.929561  | 4.719311  | H | -3.085073 | -0.580288 | -2.175260 |
| H  | -4.796345 | 2.505883  | 4.383870  | C | -3.947486 | -3.346803 | -3.955991 |
| H  | -2.753084 | 2.352068  | 5.790106  | H | -3.183795 | -5.332330 | -3.604938 |
| Pd | -0.500766 | 0.193288  | -0.299809 | H | -4.522983 | -1.269560 | -4.068519 |
| C  | -3.989298 | 1.258298  | -0.450493 | H | -4.569023 | -3.649242 | -4.797401 |
| C  | -4.683488 | 0.211374  | 0.176232  | H | 1.842105  | -1.726191 | 0.983351  |
| C  | -4.535100 | 1.822822  | -1.610600 | C | 3.729151  | -0.704364 | 1.037543  |
| C  | -5.887427 | -0.253074 | -0.339829 | H | 3.983424  | -1.074195 | 2.043437  |
| H  | -4.274365 | -0.244966 | 1.078080  | C | 4.377738  | -1.678175 | 0.044587  |
| C  | -5.739086 | 1.350008  | -2.129515 | H | 3.903982  | -2.654812 | 0.222246  |
| H  | -4.013659 | 2.637247  | -2.113535 | H | 4.133903  | -1.379705 | -0.979836 |
| C  | -6.418032 | 0.310781  | -1.498797 | N | 4.314545  | 0.630084  | 0.986394  |
| H  | -6.409089 | -1.065418 | 0.164447  | C | 5.866186  | -1.789700 | 0.221838  |
| H  | -6.148975 | 1.801650  | -3.032143 | C | 6.752762  | -1.115121 | -0.622889 |
| H  | -7.356811 | -0.058576 | -1.908111 | C | 6.395905  | -2.553445 | 1.267061  |
| P  | -1.351760 | -1.990687 | -0.367031 | C | 8.128402  | -1.202905 | -0.426637 |
| C  | -0.119304 | -3.336111 | -0.174008 | H | 6.349172  | -0.511809 | -1.435255 |
| C  | 0.923222  | -3.420384 | -1.109901 | C | 7.770059  | -2.643199 | 1.466874  |
| C  | -0.126567 | -4.226755 | 0.904315  | H | 5.715373  | -3.092597 | 1.929374  |
| C  | 1.916530  | -4.384002 | -0.979538 | C | 8.642893  | -1.965801 | 0.618609  |
| H  | 0.954184  | -2.714013 | -1.941679 | H | 8.803036  | -0.670552 | -1.096447 |
| C  | 0.881250  | -5.179092 | 1.044957  | H | 8.161164  | -3.248718 | 2.283691  |
| H  | -0.925859 | -4.177228 | 1.642271  | H | 9.719042  | -2.035978 | 0.769806  |
| C  | 1.902008  | -5.263790 | 0.103779  | H | 4.311638  | 1.163770  | 1.843382  |
| H  | 2.716695  | -4.438035 | -1.716531 | C | 4.475913  | 1.374295  | -0.145024 |
| H  | 0.862566  | -5.861396 | 1.893636  | O | 4.412443  | 0.963814  | -1.293059 |
| H  | 2.688297  | -6.008773 | 0.212601  | O | 4.765715  | 2.649461  | 0.225875  |
| C  | -2.475738 | -2.268829 | 1.056316  | C | 5.126663  | 3.630726  | -0.798242 |
| C  | -3.638243 | -3.045379 | 1.003051  | C | 5.456163  | 4.861956  | 0.030949  |
| C  | -2.175662 | -1.580914 | 2.240779  | H | 5.728191  | 5.698365  | -0.622890 |
| C  | -4.489102 | -3.113094 | 2.104874  | H | 4.594318  | 5.163883  | 0.636298  |
| H  | -3.891784 | -3.580624 | 0.087501  | H | 6.296662  | 4.663760  | 0.705418  |
| C  | -3.020637 | -1.653417 | 3.342281  | C | 6.352575  | 3.165869  | -1.572320 |
| H  | -1.282599 | -0.952441 | 2.274205  | H | 7.143563  | 2.851789  | -0.880214 |

|   |          |          |           |   |           |           |           |
|---|----------|----------|-----------|---|-----------|-----------|-----------|
| H | 6.116015 | 2.329908 | -2.233614 | H | -1.642416 | -6.026456 | 1.760532  |
| H | 6.741545 | 3.993794 | -2.178046 | H | -0.387498 | -5.964884 | -2.351583 |
| C | 3.935796 | 3.897881 | -1.706107 | H | -1.560547 | -7.100166 | -0.475833 |
| H | 3.679902 | 3.011606 | -2.291419 | C | 3.500235  | 1.135700  | 0.404930  |
| H | 3.061564 | 4.192493 | -1.112791 | C | 4.682593  | 1.457650  | -0.269989 |
| H | 4.172062 | 4.719139 | -2.394215 | C | 3.579253  | 0.367002  | 1.575532  |

### IM6'''

SCF energy in MeCN: -3029.82121 a.u.

Free energy in MeCN: -3028.998636 a.u.

|    |           |           |           |   |           |           |           |
|----|-----------|-----------|-----------|---|-----------|-----------|-----------|
| Pd | -0.048040 | -0.045523 | -0.871638 | H | 6.820966  | 1.262697  | -0.329941 |
| P  | 0.857993  | -1.976561 | 0.243357  | H | 4.840429  | -0.684851 | 2.955357  |
| P  | 1.833507  | 1.603676  | -0.194206 | H | 6.935359  | -0.144525 | 1.714923  |
| C  | 0.943181  | -1.687136 | 2.047896  | C | 1.144677  | 2.571997  | 1.193556  |
| C  | 1.716683  | -2.454851 | 2.927977  | C | -0.243906 | 2.736273  | 1.272238  |
| C  | 0.216689  | -0.604888 | 2.561416  | C | 1.954471  | 3.161093  | 2.172029  |
| C  | 1.773981  | -2.131136 | 4.279858  | C | -0.815674 | 3.453572  | 2.317724  |
| H  | 2.290451  | -3.302142 | 2.557779  | H | -0.880299 | 2.290500  | 0.505075  |
| C  | 0.272490  | -0.279493 | 3.914102  | C | 1.380038  | 3.880461  | 3.217024  |
| H  | -0.365852 | 0.017277  | 1.878123  | H | 3.036501  | 3.052978  | 2.121094  |
| C  | 1.057573  | -1.041512 | 4.774741  | C | -0.003310 | 4.022982  | 3.296244  |
| H  | 2.384794  | -2.731626 | 4.950981  | H | -1.898822 | 3.552317  | 2.366165  |
| H  | -0.284566 | 0.578502  | 4.286679  | H | 2.019392  | 4.331598  | 3.973179  |
| H  | 1.113598  | -0.788094 | 5.831329  | H | -0.448071 | 4.579180  | 4.119144  |
| C  | 2.543882  | -2.337486 | -0.382966 | C | 2.146732  | 2.832161  | -1.507715 |
| C  | 3.258624  | -3.466933 | 0.044783  | C | 1.711955  | 4.158624  | -1.407857 |
| C  | 3.106269  | -1.529259 | -1.375822 | C | 2.744636  | 2.405552  | -2.704368 |
| C  | 4.524620  | -3.735312 | -0.462111 | C | 1.873576  | 5.034322  | -2.479074 |
| H  | 2.808948  | -4.164214 | 0.750372  | H | 1.243000  | 4.510885  | -0.490197 |
| C  | 4.368640  | -1.804100 | -1.892966 | C | 2.912443  | 3.284052  | -3.768616 |
| H  | 2.539941  | -0.674067 | -1.747037 | H | 3.096101  | 1.375551  | -2.797454 |
| C  | 5.086975  | -2.899191 | -1.425498 | C | 2.470203  | 4.601017  | -3.659456 |
| H  | 5.068381  | -4.612018 | -0.116333 | H | 1.530910  | 6.062966  | -2.387241 |
| H  | 4.792541  | -1.155517 | -2.658245 | H | 3.384234  | 2.938673  | -4.686410 |
| H  | 6.076621  | -3.114257 | -1.823247 | H | 2.591765  | 5.287965  | -4.494129 |
| C  | 0.117403  | -3.641123 | 0.089230  | C | -2.155364 | -0.611304 | -0.780566 |
| C  | -0.536984 | -4.288778 | 1.141220  | C | -0.641647 | 1.335320  | -2.527287 |
| C  | 0.163469  | -4.256338 | -1.170331 | H | -1.731117 | 1.350254  | -2.542068 |
| C  | -1.137325 | -5.529551 | 0.934838  | C | 0.065284  | 0.325545  | -3.234357 |
| H  | -0.582341 | -3.824904 | 2.126256  | H | 1.121742  | 0.514644  | -3.443511 |
| C  | -0.434306 | -5.494328 | -1.371495 | C | -0.437751 | -0.894966 | -3.638843 |
| H  | 0.676309  | -3.759673 | -1.995590 | H | -1.491663 | -1.147420 | -3.528886 |
| C  | -1.090260 | -6.131923 | -0.318581 | H | 0.199471  | -1.629854 | -4.124984 |

|                                        |           |           |           |   |           |           |           |
|----------------------------------------|-----------|-----------|-----------|---|-----------|-----------|-----------|
| H                                      | -0.174234 | 2.314886  | -2.434002 | C | 0.316558  | -2.399431 | -0.771778 |
| H                                      | -2.536301 | -0.328905 | -1.764932 | C | 1.339580  | -3.316797 | -3.189404 |
| N                                      | -2.555885 | 0.367777  | 0.146454  | H | 0.945609  | -1.349064 | -3.946303 |
| C                                      | -2.561520 | -2.014758 | -0.389150 | C | 0.790872  | -3.706155 | -0.874811 |
| H                                      | -2.076391 | -2.736779 | -1.056063 | H | -0.080908 | -2.035874 | 0.179827  |
| H                                      | -2.213192 | -2.242114 | 0.629514  | C | 1.307866  | -4.165424 | -2.083104 |
| C                                      | -4.062884 | -2.128505 | -0.482330 | H | 1.742236  | -3.671185 | -4.137407 |
| C                                      | -4.878062 | -1.824598 | 0.612137  | H | 0.764654  | -4.356256 | -0.001096 |
| C                                      | -4.667117 | -2.457358 | -1.699119 | H | 1.688125  | -5.182493 | -2.164679 |
| C                                      | -6.264406 | -1.860536 | 0.496812  | C | 0.749564  | 1.271854  | -2.708862 |
| H                                      | -4.421573 | -1.574964 | 1.572117  | C | 0.691275  | 1.194360  | -4.108948 |
| C                                      | -6.052721 | -2.494112 | -1.818170 | C | 1.531972  | 2.275948  | -2.128702 |
| H                                      | -4.040504 | -2.694970 | -2.560455 | C | 1.425020  | 2.072505  | -4.898648 |
| C                                      | -6.854888 | -2.192735 | -0.720262 | H | 0.037695  | 0.463312  | -4.584333 |
| H                                      | -6.885490 | -1.632909 | 1.361240  | C | 2.260205  | 3.161804  | -2.918153 |
| H                                      | -6.507718 | -2.759695 | -2.770427 | H | 1.554837  | 2.356935  | -1.039174 |
| H                                      | -7.938591 | -2.221064 | -0.811455 | C | 2.214760  | 3.055911  | -4.304095 |
| H                                      | -2.538545 | 0.137843  | 1.134233  | H | 1.370790  | 1.997448  | -5.983403 |
| C                                      | -3.337859 | 1.466063  | -0.209030 | H | 2.866978  | 3.932748  | -2.444629 |
| O                                      | -3.600803 | 1.747718  | -1.360676 | H | 2.784055  | 3.745924  | -4.924851 |
| O                                      | -3.704304 | 2.109263  | 0.904838  | C | -1.846459 | 0.144029  | -2.440578 |
| C                                      | -4.656814 | 3.253946  | 0.795455  | C | -2.652068 | -0.999831 | -2.357096 |
| C                                      | -4.881492 | 3.633677  | 2.247133  | C | -2.356630 | 1.276830  | -3.089332 |
| H                                      | -5.601469 | 4.456587  | 2.306747  | C | -3.931904 | -1.008443 | -2.902360 |
| H                                      | -5.279809 | 2.788730  | 2.818660  | H | -2.280594 | -1.888441 | -1.845983 |
| H                                      | -3.953265 | 3.967713  | 2.724997  | C | -3.628327 | 1.258729  | -3.655726 |
| C                                      | -5.949151 | 2.775129  | 0.158088  | H | -1.750734 | 2.180070  | -3.157455 |
| H                                      | -5.810476 | 2.499795  | -0.889435 | C | -4.422425 | 0.117863  | -3.560169 |
| H                                      | -6.352058 | 1.912991  | 0.702133  | H | -4.546277 | -1.902975 | -2.812819 |
| H                                      | -6.693370 | 3.577907  | 0.207251  | H | -4.004042 | 2.146542  | -4.162179 |
| C                                      | -3.997244 | 4.382535  | 0.023345  | H | -5.421443 | 0.108028  | -3.992769 |
| H                                      | -3.032093 | 4.649204  | 0.471936  | C | 3.591956  | -0.072001 | -0.633931 |
| H                                      | -3.840033 | 4.116803  | -1.024591 | C | 4.374514  | 1.010022  | -1.060639 |
| H                                      | -4.637844 | 5.270979  | 0.061235  | C | 3.588505  | -1.238091 | -1.412638 |
|                                        |           |           |           | C | 5.118507  | 0.933958  | -2.232771 |
| <b>IM7''</b>                           |           |           |           | H | 4.399778  | 1.927302  | -0.472946 |
| SCF energy in MeCN: -3029.98155 a.u.   |           |           |           | C | 4.336801  | -1.312919 | -2.583234 |
| Free energy in MeCN: -3029.153157 a.u. |           |           |           | H | 2.998323  | -2.098997 | -1.099825 |
|                                        |           |           |           | C | 5.101240  | -0.226761 | -3.001450 |
| Pd                                     | 0.080091  | 0.690057  | 0.750403  | H | 5.714872  | 1.789777  | -2.546205 |
| P                                      | -0.217878 | 0.187964  | -1.590533 | H | 4.314499  | -2.229998 | -3.170912 |
| P                                      | 2.466805  | 0.098478  | 0.808974  | H | 5.682847  | -0.285059 | -3.919938 |
| C                                      | 0.368100  | -1.531972 | -1.870680 | C | 2.630434  | -1.508977 | 1.671256  |
| C                                      | 0.875031  | -2.009870 | -3.084544 | C | 1.517051  | -1.995477 | 2.371302  |



|    |           |           |           |   |           |           |           |
|----|-----------|-----------|-----------|---|-----------|-----------|-----------|
| C  | 5.067852  | -2.249221 | 0.654576  | C | 1.007164  | 2.816904  | 0.753486  |
| C  | 3.359555  | -4.335967 | 1.367222  | C | 0.633063  | 3.889956  | 1.577189  |
| H  | 1.838302  | -3.252389 | 0.289172  | C | 1.740115  | 3.072700  | -0.410187 |
| C  | 5.540757  | -3.307440 | 1.425203  | C | 1.004307  | 5.188271  | 1.247021  |
| H  | 5.739783  | -1.436937 | 0.379950  | H | 0.039672  | 3.706082  | 2.473097  |
| C  | 4.690050  | -4.351263 | 1.781782  | C | 2.113659  | 4.373641  | -0.735691 |
| H  | 2.691980  | -5.150439 | 1.642102  | H | 2.020822  | 2.243701  | -1.061121 |
| H  | 6.580822  | -3.317686 | 1.744510  | C | 1.748233  | 5.430659  | 0.092838  |
| H  | 5.063508  | -5.177413 | 2.383549  | H | 0.710085  | 6.015001  | 1.890495  |
| Pd | 0.726926  | -0.575089 | -0.530182 | H | 2.688259  | 4.559369  | -1.641193 |
| C  | 4.142518  | 0.549289  | -0.478369 | H | 2.035666  | 6.448365  | -0.163440 |
| C  | 4.438120  | 0.915838  | 0.842935  | H | -2.115837 | -0.001797 | -0.396206 |
| C  | 4.592620  | 1.362579  | -1.526731 | C | -3.874663 | -1.583353 | -0.690242 |
| C  | 5.156126  | 2.077047  | 1.107286  | H | -3.735016 | -1.954102 | -1.703443 |
| H  | 4.121750  | 0.277877  | 1.667670  | C | -4.047576 | -2.525556 | 0.459480  |
| C  | 5.313709  | 2.522019  | -1.255690 | H | -3.481471 | -3.440572 | 0.244987  |
| H  | 4.382882  | 1.087197  | -2.559734 | H | -3.597405 | -2.075463 | 1.360186  |
| C  | 5.590344  | 2.886578  | 0.059766  | N | -4.560973 | -0.394060 | -0.618893 |
| H  | 5.380457  | 2.344557  | 2.138538  | C | -5.499211 | -2.835508 | 0.744474  |
| H  | 5.665301  | 3.140535  | -2.079614 | C | -6.166541 | -2.175301 | 1.779581  |
| H  | 6.152137  | 3.794794  | 0.268522  | C | -6.212626 | -3.733744 | -0.054021 |
| P  | 0.571542  | 1.100253  | 1.157714  | C | -7.519321 | -2.407948 | 2.016948  |
| C  | -1.128147 | 1.216758  | 1.829312  | H | -5.608757 | -1.490122 | 2.422610  |
| C  | -2.065679 | 2.059238  | 1.212940  | C | -7.561715 | -3.972207 | 0.184714  |
| C  | -1.561958 | 0.338957  | 2.829881  | H | -5.703059 | -4.253953 | -0.865685 |
| C  | -3.401138 | 2.034890  | 1.603661  | C | -8.219283 | -3.307328 | 1.218513  |
| H  | -1.745129 | 2.740260  | 0.423319  | H | -8.024030 | -1.893313 | 2.832311  |
| C  | -2.900725 | 0.313128  | 3.215141  | H | -8.103715 | -4.681290 | -0.438050 |
| H  | -0.846773 | -0.322044 | 3.320040  | H | -9.274591 | -3.495744 | 1.404085  |
| C  | -3.823252 | 1.160979  | 2.605199  | H | -5.082910 | -0.163719 | 0.220196  |
| H  | -4.117920 | 2.697009  | 1.120371  | C | -4.428729 | 0.586929  | -1.589946 |
| H  | -3.220107 | -0.363351 | 4.006795  | O | -3.694695 | 0.456490  | -2.552910 |
| H  | -4.866195 | 1.152733  | 2.918825  | O | -5.206330 | 1.625439  | -1.266341 |
| C  | 1.597372  | 0.619874  | 2.589961  | C | -5.257546 | 2.812817  | -2.156161 |
| C  | 2.235120  | 1.543429  | 3.425010  | C | -6.259650 | 3.705231  | -1.447305 |
| C  | 1.809699  | -0.749501 | 2.801223  | H | -6.392322 | 4.636516  | -2.008147 |
| C  | 3.072968  | 1.101453  | 4.444980  | H | -7.234436 | 3.213343  | -1.364664 |
| H  | 2.105250  | 2.611867  | 3.257480  | H | -5.916658 | 3.962922  | -0.438595 |
| C  | 2.645851  | -1.190339 | 3.822175  | C | -5.763885 | 2.405356  | -3.528051 |
| H  | 1.338682  | -1.474114 | 2.132013  | H | -5.045179 | 1.773168  | -4.053689 |
| C  | 3.283029  | -0.262166 | 4.643052  | H | -6.715435 | 1.868735  | -3.444534 |
| H  | 3.572031  | 1.827782  | 5.083942  | H | -5.939172 | 3.304028  | -4.130276 |
| H  | 2.812440  | -2.256985 | 3.962430  | C | -3.885840 | 3.463344  | -2.208294 |
| H  | 3.948217  | -0.601003 | 5.434722  | H | -3.942873 | 4.390177  | -2.790464 |



|                                        |           |           |           |   |           |           |           |
|----------------------------------------|-----------|-----------|-----------|---|-----------|-----------|-----------|
| H                                      | -3.542772 | 3.726760  | -1.200224 | C | 4.187282  | -0.323980 | -1.411017 |
| H                                      | -3.147882 | 2.808293  | -2.678162 | C | 3.663655  | -1.312837 | 0.727778  |
|                                        |           |           |           | C | 5.092124  | -1.353264 | -1.656672 |
| <b>TS2b'''</b>                         |           |           |           | H | 4.048134  | 0.462049  | -2.152179 |
| SCF energy in MeCN: -3029.822855 a.u.  |           |           |           | C | 4.560648  | -2.344036 | 0.474946  |
| Free energy in MeCN: -3028.997188 a.u. |           |           |           | H | 3.131556  | -1.285861 | 1.677873  |
|                                        |           |           |           | C | 5.281027  | -2.363882 | -0.717529 |
| Pd                                     | -0.057801 | 0.495394  | 0.068417  | H | 5.652742  | -1.362254 | -2.589787 |
| P                                      | -0.071516 | -1.720742 | -0.723688 | H | 4.705374  | -3.126030 | 1.218300  |
| P                                      | 2.230368  | 1.000571  | 0.147488  | H | 5.992250  | -3.164289 | -0.912788 |
| C                                      | 0.173805  | -3.000183 | 0.546153  | C | 2.630893  | 1.451962  | 1.875894  |
| C                                      | -0.140966 | -4.347281 | 0.315082  | C | 1.580009  | 1.660602  | 2.778670  |
| C                                      | 0.674836  | -2.621896 | 1.796581  | C | 3.951002  | 1.560459  | 2.337263  |
| C                                      | 0.071001  | -5.296326 | 1.309340  | C | 1.837265  | 2.000827  | 4.103719  |
| H                                      | -0.555099 | -4.649825 | -0.647087 | H | 0.547436  | 1.548994  | 2.437309  |
| C                                      | 0.889476  | -3.573836 | 2.790647  | C | 4.206537  | 1.904688  | 3.659972  |
| H                                      | 0.885849  | -1.566204 | 1.985376  | H | 4.783217  | 1.346885  | 1.666891  |
| C                                      | 0.592090  | -4.912082 | 2.544870  | C | 3.151534  | 2.130575  | 4.543218  |
| H                                      | -0.171697 | -6.340004 | 1.120411  | H | 1.007705  | 2.163064  | 4.789680  |
| H                                      | 1.278523  | -3.266865 | 3.760321  | H | 5.234794  | 1.988386  | 4.006088  |
| H                                      | 0.756034  | -5.657769 | 3.320067  | H | 3.357476  | 2.397276  | 5.577793  |
| C                                      | 1.139036  | -2.018190 | -2.048401 | C | 2.719079  | 2.400138  | -0.920920 |
| C                                      | 1.911572  | -3.180184 | -2.126745 | C | 3.978215  | 3.006776  | -0.834880 |
| C                                      | 1.270469  | -1.039130 | -3.045746 | C | 1.796389  | 2.877885  | -1.860339 |
| C                                      | 2.784629  | -3.368175 | -3.194463 | C | 4.302400  | 4.073080  | -1.665982 |
| H                                      | 1.837485  | -3.938738 | -1.349023 | H | 4.710439  | 2.643186  | -0.115441 |
| C                                      | 2.131771  | -1.238260 | -4.119068 | C | 2.123231  | 3.942889  | -2.695602 |
| H                                      | 0.686191  | -0.117328 | -2.977184 | H | 0.806999  | 2.413987  | -1.914439 |
| C                                      | 2.888798  | -2.406387 | -4.195566 | C | 3.376098  | 4.542304  | -2.596466 |
| H                                      | 3.387292  | -4.273291 | -3.241841 | H | 5.281315  | 4.541235  | -1.586812 |
| H                                      | 2.219167  | -0.476601 | -4.891678 | H | 1.396852  | 4.308825  | -3.419102 |
| H                                      | 3.568365  | -2.560740 | -5.031584 | H | 3.631919  | 5.379561  | -3.242504 |
| C                                      | -1.674820 | -2.175529 | -1.477544 | C | -2.047006 | 2.078299  | 0.112017  |
| C                                      | -2.778052 | -2.364192 | -0.626111 | C | -0.288754 | 3.674470  | 0.813832  |
| C                                      | -1.864035 | -2.280484 | -2.862086 | C | -0.895503 | 4.759584  | 0.148303  |
| C                                      | -4.030934 | -2.668809 | -1.148187 | H | -0.441206 | 5.094973  | -0.787445 |
| H                                      | -2.644802 | -2.297056 | 0.453289  | C | -2.047452 | 5.356376  | 0.567107  |
| C                                      | -3.121114 | -2.588440 | -3.377872 | H | -2.518037 | 5.069513  | 1.508163  |
| H                                      | -1.024364 | -2.145442 | -3.541911 | H | -2.509248 | 6.172441  | 0.017282  |
| C                                      | -4.205132 | -2.787469 | -2.526269 | H | -0.592339 | 3.423685  | 1.828783  |
| H                                      | -4.871954 | -2.821272 | -0.473515 | H | -2.460222 | 2.835563  | 0.775691  |
| H                                      | -3.248542 | -2.684472 | -4.454311 | N | -2.245884 | 0.770832  | 0.589328  |
| H                                      | -5.182329 | -3.038019 | -2.934758 | C | -2.292150 | 2.241298  | -1.359542 |
| C                                      | 3.468181  | -0.290012 | -0.211035 | H | -1.968010 | 3.247827  | -1.650660 |

|                                        |           |           |           |   |           |           |           |
|----------------------------------------|-----------|-----------|-----------|---|-----------|-----------|-----------|
| H                                      | -1.682723 | 1.517434  | -1.927456 | H | 0.070390  | -0.391636 | 1.866312  |
| C                                      | -3.755934 | 2.031741  | -1.667720 | C | -1.416533 | 1.391620  | 4.351423  |
| C                                      | -4.209353 | 0.803963  | -2.156341 | H | -1.872059 | 3.496916  | 4.252859  |
| C                                      | -4.683944 | 3.038675  | -1.387370 | H | -0.857796 | -0.684329 | 4.144212  |
| C                                      | -5.569309 | 0.590464  | -2.372101 | H | -1.841738 | 1.264314  | 5.345621  |
| H                                      | -3.489228 | 0.016991  | -2.395736 | C | -0.679892 | 3.181112  | -0.722638 |
| C                                      | -6.040429 | 2.828196  | -1.609650 | C | -0.496120 | 4.530769  | -0.385990 |
| H                                      | -4.330320 | 3.993419  | -0.993530 | C | -1.639040 | 2.855817  | -1.688505 |
| C                                      | -6.486347 | 1.601338  | -2.100106 | C | -1.266490 | 5.521151  | -0.986261 |
| H                                      | -5.908767 | -0.367176 | -2.763858 | H | 0.267600  | 4.807482  | 0.341076  |
| H                                      | -6.753889 | 3.623011  | -1.401029 | C | -2.411102 | 3.846836  | -2.288057 |
| H                                      | -7.547918 | 1.437243  | -2.273571 | H | -1.766361 | 1.807143  | -1.965965 |
| H                                      | 0.704011  | 3.347049  | 0.517691  | C | -2.228779 | 5.180539  | -1.935561 |
| H                                      | -2.746810 | 0.092530  | 0.004439  | H | -1.111742 | 6.564533  | -0.715135 |
| C                                      | -2.340908 | 0.571452  | 1.995210  | H | -3.157214 | 3.572489  | -3.032261 |
| O                                      | -2.668600 | -0.691593 | 2.226194  | H | -2.828871 | 5.957932  | -2.405958 |
| C                                      | -2.770613 | -1.196872 | 3.632510  | C | 1.910501  | 2.585331  | 0.319595  |
| C                                      | -1.474987 | -0.927068 | 4.376666  | C | 2.671139  | 2.260167  | 1.455051  |
| H                                      | -0.613229 | -1.250399 | 3.780993  | C | 2.505291  | 3.388401  | -0.668963 |
| H                                      | -1.357765 | 0.129019  | 4.627805  | C | 3.966944  | 2.746640  | 1.609011  |
| H                                      | -1.473121 | -1.507253 | 5.306549  | H | 2.238880  | 1.628417  | 2.232516  |
| C                                      | -2.979256 | -2.683456 | 3.413438  | C | 3.791562  | 3.889896  | -0.501863 |
| H                                      | -3.113083 | -3.184905 | 4.377694  | H | 1.942482  | 3.639088  | -1.568771 |
| H                                      | -3.872839 | -2.870928 | 2.806979  | C | 4.528520  | 3.574425  | 0.639299  |
| H                                      | -2.112896 | -3.132890 | 2.912373  | H | 4.534715  | 2.485494  | 2.501050  |
| C                                      | -3.971469 | -0.544932 | 4.289176  | H | 4.225224  | 4.524380  | -1.273401 |
| H                                      | -3.832362 | 0.534068  | 4.398998  | H | 5.537422  | 3.963292  | 0.765446  |
| H                                      | -4.883340 | -0.730773 | 3.711286  | C | -3.669907 | 0.555901  | -0.151591 |
| H                                      | -4.115269 | -0.970866 | 5.288421  | C | -4.520015 | 0.928737  | -1.201692 |
| O                                      | -2.103900 | 1.460665  | 2.783409  | C | -3.646020 | 1.353160  | 1.003883  |
|                                        |           |           |           | C | -5.316944 | 2.065039  | -1.101685 |
|                                        |           |           |           | H | -4.560684 | 0.324381  | -2.107451 |
|                                        |           |           |           | C | -4.439155 | 2.491664  | 1.097179  |
|                                        |           |           |           | H | -3.005648 | 1.073288  | 1.840378  |
|                                        |           |           |           | C | -5.275934 | 2.855383  | 0.044199  |
|                                        |           |           |           | H | -5.973620 | 2.334601  | -1.928156 |
|                                        |           |           |           | H | -4.401055 | 3.095165  | 2.003552  |
|                                        |           |           |           | H | -5.894244 | 3.748405  | 0.117431  |
|                                        |           |           |           | C | -2.627286 | -1.783341 | 1.188219  |
|                                        |           |           |           | C | -1.587647 | -2.676865 | 1.487176  |
|                                        |           |           |           | C | -3.728091 | -1.717533 | 2.051051  |
|                                        |           |           |           | C | -1.659141 | -3.499262 | 2.606794  |
|                                        |           |           |           | H | -0.708236 | -2.714140 | 0.836714  |
|                                        |           |           |           | C | -3.785402 | -2.523007 | 3.186250  |
| <b>TS2c'''</b>                         |           |           |           |   |           |           |           |
| SCF energy in MeCN: -3029.929077 a.u.  |           |           |           |   |           |           |           |
| Free energy in MeCN: -3029.107717 a.u. |           |           |           |   |           |           |           |
| Pd                                     | -0.176487 | -0.362104 | -0.864723 |   |           |           |           |
| P                                      | 0.266495  | 1.807225  | 0.035134  |   |           |           |           |
| P                                      | -2.449085 | -0.795128 | -0.345747 |   |           |           |           |
| C                                      | -0.365468 | 1.716539  | 1.766933  |   |           |           |           |
| C                                      | -0.912424 | 2.804747  | 2.456393  |   |           |           |           |
| C                                      | -0.338437 | 0.467826  | 2.401972  |   |           |           |           |
| C                                      | -1.435288 | 2.642593  | 3.736979  |   |           |           |           |
| H                                      | -0.966781 | 3.780781  | 1.976218  |   |           |           |           |
| C                                      | -0.859423 | 0.303929  | 3.683255  |   |           |           |           |

|   |           |           |           |   |          |           |           |
|---|-----------|-----------|-----------|---|----------|-----------|-----------|
| H | -4.543534 | -1.027695 | 1.834476  | C | 3.051547 | -0.943373 | 4.509104  |
| C | -2.755832 | -3.419164 | 3.463362  | H | 3.229942 | -1.383081 | 5.496888  |
| H | -0.849923 | -4.196839 | 2.815078  | H | 3.903300 | -0.300948 | 4.257795  |
| H | -4.644720 | -2.455791 | 3.851996  | H | 2.152791 | -0.317330 | 4.565994  |
| H | -2.806195 | -4.053368 | 4.346976  | C | 4.128224 | -2.897697 | 3.359754  |
| C | -3.265634 | -1.854689 | -1.603633 | H | 4.010079 | -3.664975 | 2.590264  |
| C | -4.241892 | -2.809929 | -1.300125 | H | 4.999757 | -2.281178 | 3.111825  |
| C | -2.886889 | -1.677948 | -2.941858 | H | 4.323658 | -3.392576 | 4.318873  |
| C | -4.832015 | -3.560274 | -2.312858 | C | 1.638187 | -2.865461 | 3.761198  |
| H | -4.541194 | -2.966652 | -0.263709 | H | 0.737494 | -2.240886 | 3.706451  |
| C | -3.483951 | -2.421408 | -3.955851 | H | 1.534057 | -3.688271 | 3.050537  |
| H | -2.106664 | -0.947500 | -3.175550 | H | 1.700885 | -3.279799 | 4.775171  |
| C | -4.458344 | -3.365265 | -3.641206 | H | 0.735874 | -3.263692 | -1.219145 |
| H | -5.590190 | -4.301337 | -2.064128 | H | 2.553863 | -2.252314 | -1.497703 |
| H | -3.178454 | -2.271913 | -4.990331 |   |          |           |           |
| H | -4.921335 | -3.955501 | -4.430196 |   |          |           |           |
| C | 2.084829  | -1.289513 | -1.278794 |   |          |           |           |
| C | 0.439217  | -2.479383 | -1.919013 |   |          |           |           |
| C | 0.890272  | -2.671507 | -3.289374 |   |          |           |           |
| H | 0.381176  | -2.073569 | -4.052592 |   |          |           |           |
| C | 1.893482  | -3.479454 | -3.673021 |   |          |           |           |
| H | 2.425457  | -4.101837 | -2.952370 |   |          |           |           |
| H | 2.191037  | -3.576385 | -4.715209 |   |          |           |           |
| H | -0.646377 | -2.347636 | -1.888980 |   |          |           |           |
| N | 2.403777  | -0.978888 | 0.069589  |   |          |           |           |
| C | 2.601146  | -0.244707 | -2.256829 |   |          |           |           |
| H | 2.164604  | -0.455477 | -3.240556 |   |          |           |           |
| H | 2.258525  | 0.756092  | -1.959752 |   |          |           |           |
| C | 4.106974  | -0.270334 | -2.328089 |   |          |           |           |
| C | 4.857865  | 0.556869  | -1.489348 |   |          |           |           |
| C | 4.778528  | -1.148289 | -3.181850 |   |          |           |           |
| C | 6.248464  | 0.522417  | -1.512294 |   |          |           |           |
| H | 4.340311  | 1.240184  | -0.815220 |   |          |           |           |
| C | 6.169644  | -1.184114 | -3.210312 |   |          |           |           |
| H | 4.194288  | -1.810414 | -3.823904 |   |          |           |           |
| C | 6.909338  | -0.347479 | -2.375979 |   |          |           |           |
| H | 6.816340  | 1.179420  | -0.853829 |   |          |           |           |
| H | 6.679963  | -1.868037 | -3.887253 |   |          |           |           |
| H | 7.997648  | -0.376395 | -2.398904 |   |          |           |           |
| H | 2.424187  | -0.004604 | 0.354977  |   |          |           |           |
| C | 2.478685  | -1.914445 | 1.061626  |   |          |           |           |
| O | 2.350689  | -3.116663 | 0.896965  |   |          |           |           |
| O | 2.702944  | -1.268781 | 2.233815  |   |          |           |           |
| C | 2.879474  | -2.037497 | 3.468343  |   |          |           |           |
